# Supplementary material for: Multianalytical investigation reveals psychotropic substances in a ptolemaic Egyptian vase
Source: PubMed Central journal article supplement — Sci Rep. 2024 Nov 13;14:27891. doi: 10.1038/s41598-024-78721-8 (PMC11561246; doi:10.1038/s41598-024-78721-8), 2024-11-13

## Ritual revealed: psychotropic substances in a Ptolemaic Egyptian vase.

Davide Tanasi<sup>1</sup>, Branko F. van Oppen de Ruiten<sup>2</sup>, Fiorella Florian<sup>3</sup>, Radmila Pavlovic<sup>4,5</sup>, Luca Maria Chiesa<sup>4</sup>, Igor Fochi<sup>6</sup>, Chiaramaria Stani<sup>7</sup>, Lisa Vaccari<sup>8</sup>, Dale Chaput<sup>9</sup>, Giorgio Samorini<sup>10</sup>, Alberto Pallavicini<sup>3</sup>, Sabrina Semeraro<sup>11</sup>, Anastasia Serena Gaetano<sup>11</sup>, Sabina Licen<sup>11</sup>, Pierluigi Barbieri<sup>11</sup>, Enrico Greco<sup>11\*</sup>

### SUPPLEMENTARY INFORMATION

#### aDNA Metabarcoding Consensus Sequences

Nitrariaceae:

ATCCTGTTTTACGAGAACAACAAGGTTTCATAAAGCGAGAAAAAGT

Cleomaceae:

ATCCTGGTTTACGCGAACAACAAGAGTTTAGAAAGCGAGAAAAAAGGG

Nymphaeaceae:

ATCCTGTTTACAGAAAACAAGGTTTCCTTTCCTAGAAAGCGAGAATCAAAAAAGAG

**Figure S1.** 3D model of the Bes-vase from the Tampa Museum of Art produced by the authors via structured light 3D scanning with an Artec Spider 3D scanner (<https://skfb.ly/oFApP>).

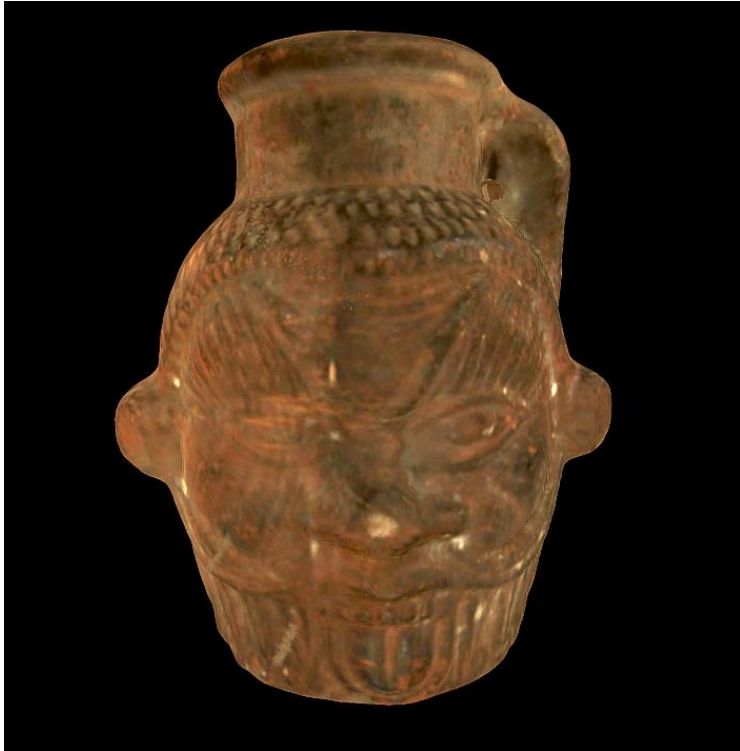

**Table S1.** Non-human proteins identified with coverage and unique peptides. The threshold of the unique peptides for the protein assignment was set at 3

| Proteins                                                                                                       | UniProt ID | Taxa                                                         | Score  | Coverage (%) | Peptides | Unique peptides |
|----------------------------------------------------------------------------------------------------------------|------------|--------------------------------------------------------------|--------|--------------|----------|-----------------|
| Myosin heavy chain, muscle                                                                                     | P05661     | <i>Drosophila melanogaster</i>                               | 83,663 | 7,8          | 12       | <b>12</b>       |
| Arginine kinase                                                                                                | O61367     | <i>Apis mellifera</i>                                        | 42,429 | 18,3         | 5        | <b>4</b>        |
| Heat shock protein SSC1, mitochondrial                                                                         | P0CS90     | <i>Saccharomyces cerevisiae</i> (strain ATCC 204508 / S288c) | 40,478 | 8,4          | 5        | <b>4</b>        |
| Alpha-amylase/trypsin inhibitor                                                                                | P17314     | <i>Triticum aestivum</i>                                     | 115,1  | 38,7         | 4        | <b>4</b>        |
| Alpha-actinin, sarcomeric                                                                                      | P18091     | <i>Drosophila melanogaster</i>                               | 36,046 | 6            | 4        | <b>4</b>        |
| V-type proton ATPase subunit B                                                                                 | P31409     | <i>Drosophila melanogaster</i>                               | 24,728 | 10,8         | 4        | <b>4</b>        |
| 11S globulin seed storage protein                                                                              | Q9XHP0     | <i>Sesamum indicum</i>                                       | 26,03  | 11,8         | 4        | <b>4</b>        |
| 14-3-3 protein beta/alpha-A;14-3-3 protein eta;14-3-3-like protein 2;14-3-3-like protein 1;14-3-3 protein zeta | P29310     | <i>Drosophila melanogaster</i>                               | 28,56  | 19,8         | 4        | <b>3</b>        |
| Calmodulin                                                                                                     | P62152     | <i>Drosophila melanogaster</i>                               | 18,205 | 29,5         | 3        | <b>3</b>        |
| Tropomyosin-2                                                                                                  | P09491     | <i>Drosophila melanogaster</i>                               | 18,995 | 11,3         | 3        | <b>3</b>        |
| ADP-ribosylation factor 1                                                                                      | P36579     | <i>Schizosaccharomyces pombe</i> (strain 972 / ATCC 24843)   | 20,419 | 21,7         | 3        | <b>3</b>        |
| Tropomyosin-1, isoforms 33/34                                                                                  | P49455     | <i>Drosophila melanogaster</i>                               | 35,855 | 15,1         | 4        | <b>3</b>        |
| Aconitate hydratase, mitochondrial                                                                             | P19414     | <i>Saccharomyces cerevisiae</i> (strain ATCC 204508 / S288c) | 20,064 | 5,2          | 3        | <b>3</b>        |

**Table S2.** Human proteins identified with coverage and unique peptides. The threshold of the unique peptides for the protein assignment was set at 3

| Proteins                              | UniProt ID | Taxa                | Score  | Coverage (%) | Peptides | Unique peptides |
|---------------------------------------|------------|---------------------|--------|--------------|----------|-----------------|
| Mucin-5B                              | Q9HC84     | <i>Homo sapiens</i> | 150,87 | 7            | 18       | 18              |
| Lactotransferrin                      | P02788     | <i>Homo sapiens</i> | 123,89 | 20           | 19       | <b>9</b>        |
| Polymeric immunoglobulin receptor     | P01833     | <i>Homo sapiens</i> | 60,595 | 14           | 9        | <b>8</b>        |
| Annexin A1                            | P04083     | <i>Homo sapiens</i> | 65,733 | 31,2         | 8        | <b>8</b>        |
| Arginase-1                            | P05089     | <i>Homo sapiens</i> | 77,198 | 35,4         | 10       | <b>8</b>        |
| Annexin A2                            | P07355     | <i>Homo sapiens</i> | 146,81 | 24,5         | 15       | <b>8</b>        |
| Prolactin-inducible protein           | P12273     | <i>Homo sapiens</i> | 67,253 | 58,9         | 9        | <b>7</b>        |
| Serpin B12                            | Q96P63     | <i>Homo sapiens</i> | 117,89 | 24           | 11       | <b>7</b>        |
| IgGfc-binding protein                 | Q9Y6R7     | <i>Homo sapiens</i> | 46,66  | 3,4          | 7        | <b>7</b>        |
| Serpin B3                             | P29508     | <i>Homo sapiens</i> | 294,11 | 26,4         | 14       | <b>6</b>        |
| Ig kappa chain C region               | P01834     | <i>Homo sapiens</i> | 80,7   | 80,4         | 6        | <b>6</b>        |
| Alpha-amylase 2B                      | P0DUB6     | <i>Homo sapiens</i> | 62,037 | 19           | 6        | <b>6</b>        |
| Ig alpha-1 chain C region             | P01876     | <i>Homo sapiens</i> | 54,753 | 23,5         | 6        | <b>5</b>        |
| Alpha-2-macroglobulin-like protein 1  | A8K2U0     | <i>Homo sapiens</i> | 45,368 | 4,2          | 7        | <b>5</b>        |
| BPI fold-containing family B member 1 | Q8TDL5     | <i>Homo sapiens</i> | 30,776 | 15,5         | 5        | <b>5</b>        |
| Serum albumin                         | P02768     | <i>Homo sapiens</i> | 135,58 | 19,4         | 26       | <b>4</b>        |
| Cathepsin D                           | P07339     | <i>Homo sapiens</i> | 56,442 | 14,3         | 8        | <b>4</b>        |

|                                      |        |                     |        |      |   |          |
|--------------------------------------|--------|---------------------|--------|------|---|----------|
| Zinc-alpha-2-glycoprotein            | P25311 | <i>Homo sapiens</i> | 53,363 | 18,5 | 7 | <b>4</b> |
| Calmodulin-like protein 3            | P27482 | <i>Homo sapiens</i> | 38,298 | 35,6 | 4 | <b>4</b> |
| Lysozyme C                           | P61626 | <i>Homo sapiens</i> | 67,759 | 40,5 | 5 | <b>4</b> |
| Desmocollin-3                        | Q14574 | <i>Homo sapiens</i> | 42,15  | 6,8  | 6 | <b>4</b> |
| Suprabasin                           | Q6UWP8 | <i>Homo sapiens</i> | 24,943 | 20,7 | 4 | <b>4</b> |
| Zymogen granule protein 16 homolog B | Q96DA0 | <i>Homo sapiens</i> | 132,33 | 36,5 | 4 | <b>4</b> |
| Protein S100-A14                     | Q9HCY8 | <i>Homo sapiens</i> | 35,287 | 54,8 | 4 | <b>4</b> |
| Hemoglobin subunit beta              | P68871 | <i>Homo sapiens</i> | 72,29  | 53,7 | 9 | <b>3</b> |
| Cystatin-SN                          | P01037 | <i>Homo sapiens</i> | 46,359 | 56,7 | 5 | <b>3</b> |
| Gamma-glutamylcyclotransferase       | O75223 | <i>Homo sapiens</i> | 36,63  | 28,2 | 5 | <b>3</b> |
| Immunoglobulin J chain               | P01591 | <i>Homo sapiens</i> | 18,781 | 22,6 | 3 | <b>3</b> |
| Myeloperoxidase;                     | P05164 | <i>Homo sapiens</i> | 17,718 | 4,6  | 3 | <b>3</b> |
| Alpha-enolase                        | P06733 | <i>Homo sapiens</i> | 37,065 | 11,3 | 5 | <b>3</b> |
| Protein S100-A7                      | P31151 | <i>Homo sapiens</i> | 30,075 | 22,8 | 5 | <b>3</b> |
| Protein POF1B                        | Q8WVV4 | <i>Homo sapiens</i> | 28,17  | 6,1  | 4 | <b>3</b> |

**Table S3.** Identification of compounds undertaken by the untarget/target HPLC-Exploris-Orbitrap®-MS procedure using the measured m/z values of parent feature in the resolved MS/MS mass spectra and the corresponding retention times (RT) accompanied by chromatographical peak area values.

| Name                                                                               | m/z       | RT [min] | Area    |
|------------------------------------------------------------------------------------|-----------|----------|---------|
| <b>Alkaloids</b>                                                                   |           |          |         |
| Harmaline                                                                          | 215,1178  | 4,244    | 4,7E+09 |
| Harmine                                                                            | 213,1022  | 4,272    | 3,7E+09 |
| Tetrahydro-harmine                                                                 | 217,13356 | 3,943    | 1,2E+07 |
| Harmol (demethylated harmaline)                                                    | 199,0866  | 3,321    | 8,9E+06 |
| Vasicine                                                                           | 189,10223 | 2,673    | 2,8E+08 |
| Ruine (7-Methoxy-1-methyl-9H-beta-carbolin-8-yl beta-D-glucopyranoside)            | 391,15    | 3,082    | 1,8E+07 |
| Probable degradation of indole alkaloid (1-(6-methoxy-1H-indol-2-yl)ethan-1-imine) | 188,10696 | 3,943    | 7,5E+06 |
| Cytisine                                                                           | 189,1023  | 4.85     | 1,7E+05 |
| Probable degradation of isoquinoline alkaloid (1,5-isoquinolinediol or isomer)     | 162,055   | 1,059    | 3,1E+06 |
| Nicotine                                                                           | 163,12299 | 1,287    | 7,3E+06 |
| Sinapine                                                                           | 310,16473 | 3,46     | 2,3E+06 |
| Nupharidine                                                                        | 250,18024 | 4,841    | 2,1E+06 |

|                                                         |           |        |                     |
|---------------------------------------------------------|-----------|--------|---------------------|
| Neferine                                                | 625,32721 | 14,54  | 1,7E+05<br>(traces) |
| <b>Carbohydrates</b>                                    |           |        |                     |
| Cellobiose                                              | 377,08557 | 0,994  | 1,3E+08             |
| Gluconic acid or isomer                                 | 195,05103 | 0,998  | 2,2E+07             |
| Hexitol                                                 | 181,07181 | 0,96   | 9,7E+06             |
| Trisaccharide (tree hexose units)                       | 503,16    | 0,998  | 3,3E+06             |
| Xylitol or isomer                                       | 151,06126 | 1,008  | 2,6E+06             |
| Chitobiose                                              | 407,24036 | 9,142  | 8,5E+05             |
| <b>Tannines</b>                                         |           |        |                     |
| Gallic acid                                             | 169,01431 | 1,712  | 1,6E+07             |
| 1,6-Bis-O-(3,4,5-trihydroxybenzoyl)hexopyranose         | 483,07806 | 3,059  | 2,4E+06             |
| 1,2,3,6-Tetra-O-galloyl-β-D-glucose                     | 787,09961 | 3,624  | 7,7E+05             |
| <b>Fatty acid and derivates</b>                         |           |        |                     |
| 9,12,13-Trihydroxy-15-octadecenoic acid (9,12,13-TODEA) | 329,23335 | 6,437  | 1,2E+08             |
| Pinolenic acid                                          | 279,23193 | 11,437 | 1,5E+07             |

|                                                          |           |       |         |
|----------------------------------------------------------|-----------|-------|---------|
| Suberic acid                                             | 173,08197 | 4,175 | 2,8E+07 |
| 12,13-Dihydroxy-9-octadecenoic acid (12,13-DIHOME)       | 313,23846 | 8,689 | 9,9E+06 |
| 9-Hydroxy-octadecadienoic acid (9-HODE)                  | 295,22668 | 10,66 | 9,0E+06 |
| O-Arachidonoyl ethanolamine                              | 348,28955 | 9,118 | 1,0E+06 |
| 12-oxo Phytodienoic Acid                                 | 293,2111  | 9,989 | 4,3E+06 |
| <b>Heterocyclic compounds</b>                            |           |       |         |
| Uric acid                                                | 167,02112 | 1,055 | 8,8E+07 |
| 6-methoxyquinoline                                       | 160,07571 | 1,718 | 5,2E+06 |
| Xanthine                                                 | 151,02621 | 1,269 | 3,0E+06 |
| Caffeine                                                 | 195,0877  | 3,274 | 1,6E+06 |
| Fraxetin                                                 | 207,0299  | 3,805 | 1,4E+06 |
| N1-[4-(1,3-Oxazol-5-yl)phenyl]cyclopropane-1-carboxamide | 229,09724 | 3.58  | 2,1E+07 |
| <b>Amino acids and derivates</b>                         |           |       |         |
| N-Benzoyl-L-phenyalaninol                                | 256,13321 | 6,093 | 4,8E+07 |
| Arginine                                                 | 175,11899 | 0,937 | 1,3E+07 |



|                                           |           |       |         |
|-------------------------------------------|-----------|-------|---------|
| Tryptophan                                | 188,0706  | 2,99  | 9,5E+06 |
| Phenylalanine                             | 166,08628 | 2,153 | 7,8E+06 |
| Carnitine                                 | 162,11249 | 0,991 | 7,5E+06 |
| N-Acetyl-glutamic acid                    | 188,05644 | 1,308 | 7,0E+06 |
| Tyrosine                                  | 182,08119 | 1,309 | 4,4E+06 |
| Histidine                                 | 156,07681 | 0,951 | 2,4E+06 |
| <b>Organic acids and derivates</b>        |           |       |         |
| Citric acid                               | 191,01974 | 1,271 | 1,6E+07 |
| P-coumaric acid                           | 165,05467 | 1,307 | 3,3E+06 |
| Gentisic acid (2,5-dihydroxybenzoic acid) | 153,01938 | 2,833 | 1,7E+06 |
| 3-Anisic acid                             | 151,0401  | 5,044 | 1,5E+06 |
| 4-Hydroxyphenylacetic acid                | 151,0401  | 6,717 | 1,0E+06 |
| Ferulic acid                              | 193,0506  | 4,62  | 1,2E+06 |
| Isoferulic acid                           | 193,0506  | 5,479 | 2,1E+06 |
| <b>Flavonoids</b>                         |           |       |         |

|                                                                                                                                         |           |       |          |
|-----------------------------------------------------------------------------------------------------------------------------------------|-----------|-------|----------|
| Quercetin 3-O-acetyl-rhamnoside                                                                                                         | 489,10388 | 5,081 | 2,9E+07  |
| Quercitrin                                                                                                                              | 447,09311 | 4,477 | 2,4E+07  |
| Myricitrin                                                                                                                              | 463,08817 | 4,094 | 2,1E+07  |
| Myricetin 3-O-galactopyranoside                                                                                                         | 479,08301 | 3,753 | 3,4E+06  |
| 7-Hydroxy-2-(4-hydroxyphenyl)-4-oxo-3,4-dihydro-2H-chromen-5-yl $\beta$ -D-glucopyranoside (Salipurposide) o isomer<br>Isosalipurposide | 433,11395 | 4,99  | 1,1E+07  |
| Isosalipurposide o isomer (salipurposide)                                                                                               | 433,11393 | 4,10  | 0.87E+07 |
| Kaempferol 3-(2''-acetylramnoside)                                                                                                      | 473,10896 | 5,493 | 8,3E+06  |
| Naringenin                                                                                                                              | 273,07575 | 4,97  | 4,4E+06  |
| Afzelin (kaempferol 3-rhamnoside)                                                                                                       | 431,09833 | 4,819 | 6,9E+06  |
| <b>Triterpene</b>                                                                                                                       |           |       |          |
| 18- $\beta$ -Glycyrrhetic acid                                                                                                          | 469,3323  | 9,785 | 1,2E+06  |
| <b>Various fungal metabolites</b>                                                                                                       |           |       |          |
| Neovasipyridone E                                                                                                                       | 308,22205 | 5,696 | 6,4E+06  |
| Aspernigrin A                                                                                                                           | 229,09724 | 4,69  | 2,1E+07  |
| Libertellenone G                                                                                                                        | 315,19537 | 9,835 | 1,2E+06  |

|                 |           |        |         |
|-----------------|-----------|--------|---------|
| 2-furoylglycine | 168,0302  | 5,243  | 2,8E+06 |
| <b>Unknown</b>  |           |        |         |
| Unknown I       | 252,10814 | 4,844  | 6,1E+06 |
| Unknown II      | 403,17682 | 11,275 | 1,9E+06 |
| Unknown III     | 201,1023  | 2,876  | 1,2E+07 |

**TABLE S4.** Extracted ion chromatogram from full MS and relative fragmentation pattern obtained in dd-MS2 acquisition mode for all compounds listed in Table 3

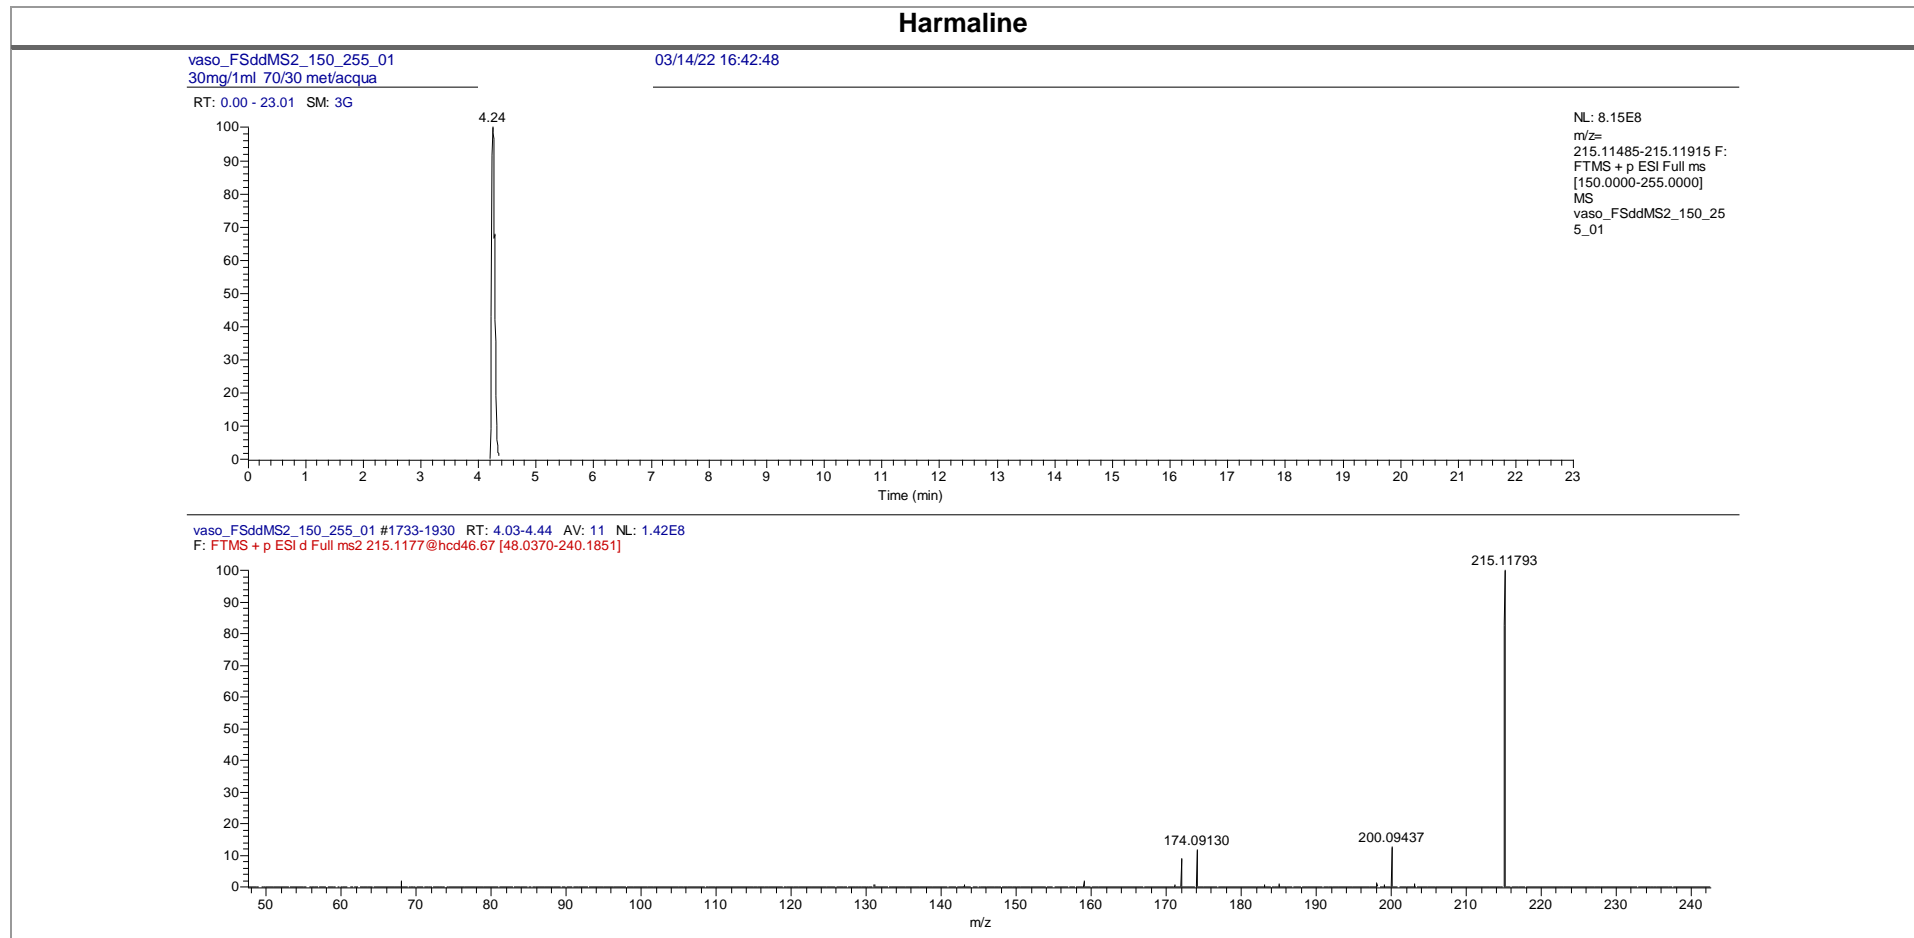

# Harmine

vaso\_FSddMS2\_150\_255\_01  
30mg/1ml 70/30 met/acqua

03/14/22 16:42:48

RT: 0.00 - 23.01 SM: 3G

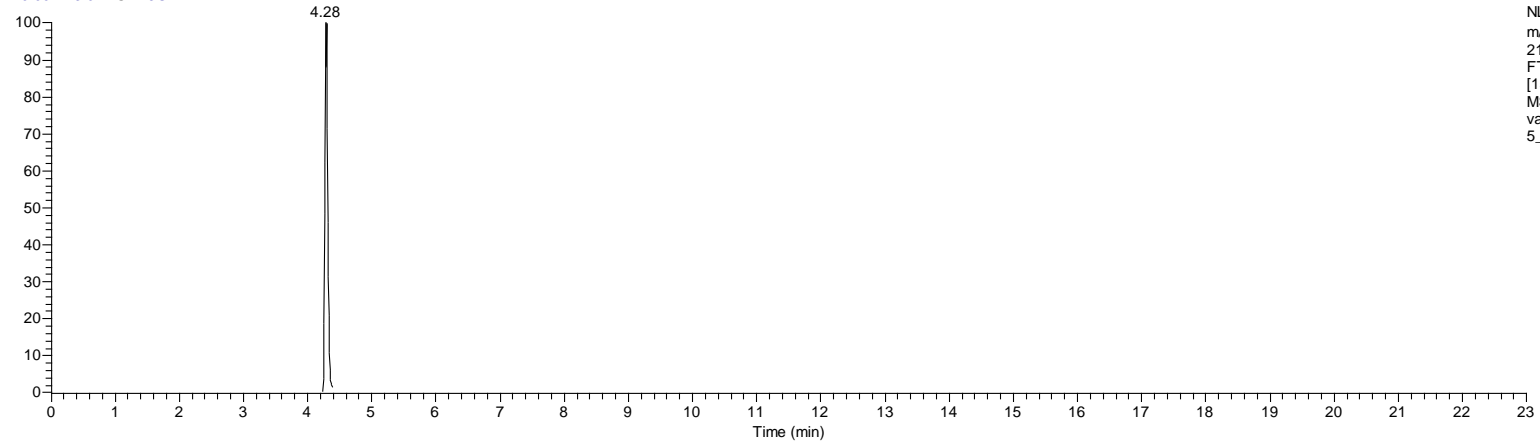

NL: 7.52E8  
m/z=  
213.09987-213.10413 F:  
FTMS + p ESI Full ms  
[150.0000-255.0000]  
MS  
vaso\_FSddMS2\_150\_25  
5\_01

vaso\_FSddMS2\_150\_255\_01 #1762-1903 RT: 4.16-4.39 AV: 5 NL: 8.20E7  
F: FTMS + p ESI d Full ms2 213.1027@hcd46.67 [47.6259-238.1297]

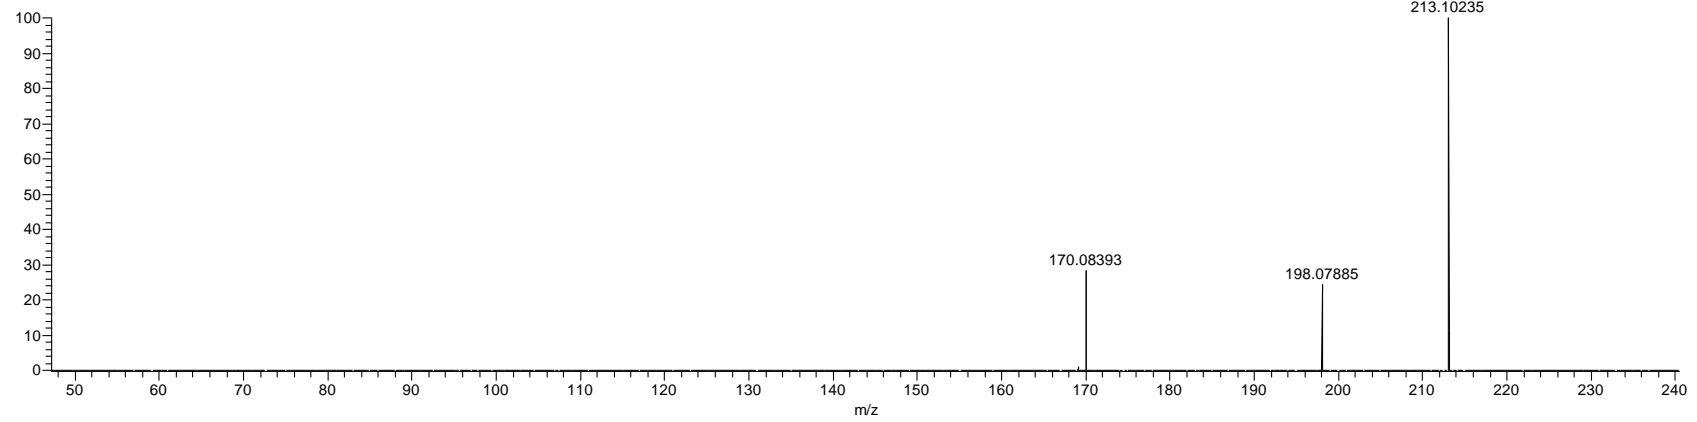

# Tetrahydro-harmine

vaso\_FSddMS2\_150\_255\_01  
30mg/1ml 70/30 met/acqua

03/14/22 16:42:48

RT: 0.00 - 23.01 SM: 3G

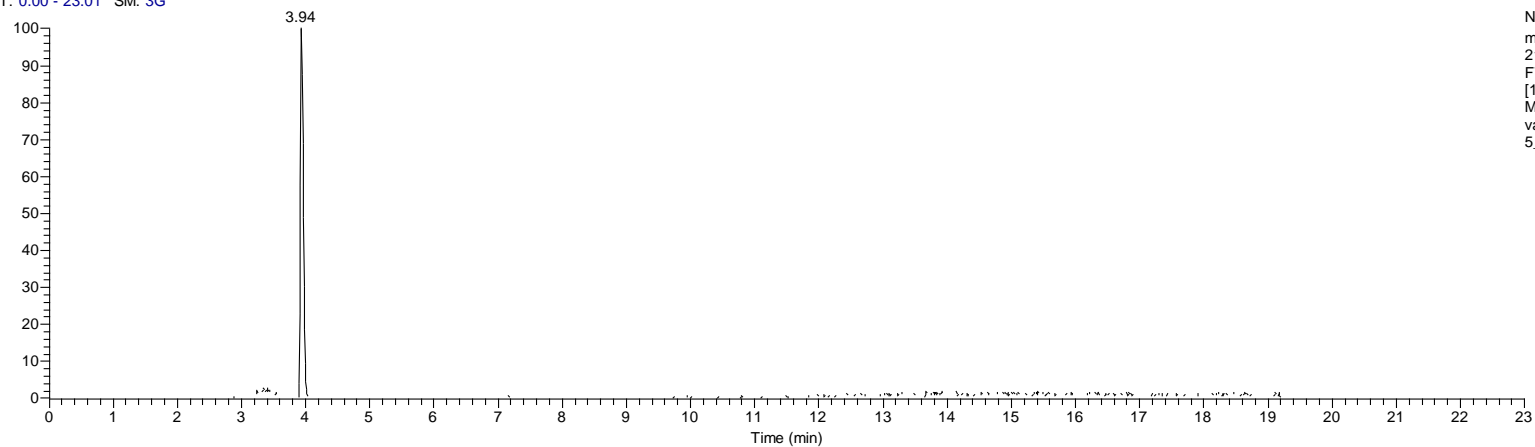

NL: 2.02E6  
m/z=  
217.13083-217.13517 F:  
FTMS + p ESI Full ms  
[150.0000-255.0000]  
MS  
vaso\_FSddMS2\_150\_25  
5\_01

vaso\_FSddMS2\_150\_255\_01 #1661-1711 RT: 3.91-3.96 AV: 2 NL: 3.55E5  
F: FTMS + p ESI d Full ms2 217.1335@hcd46.67 [48.4482-242.2412]

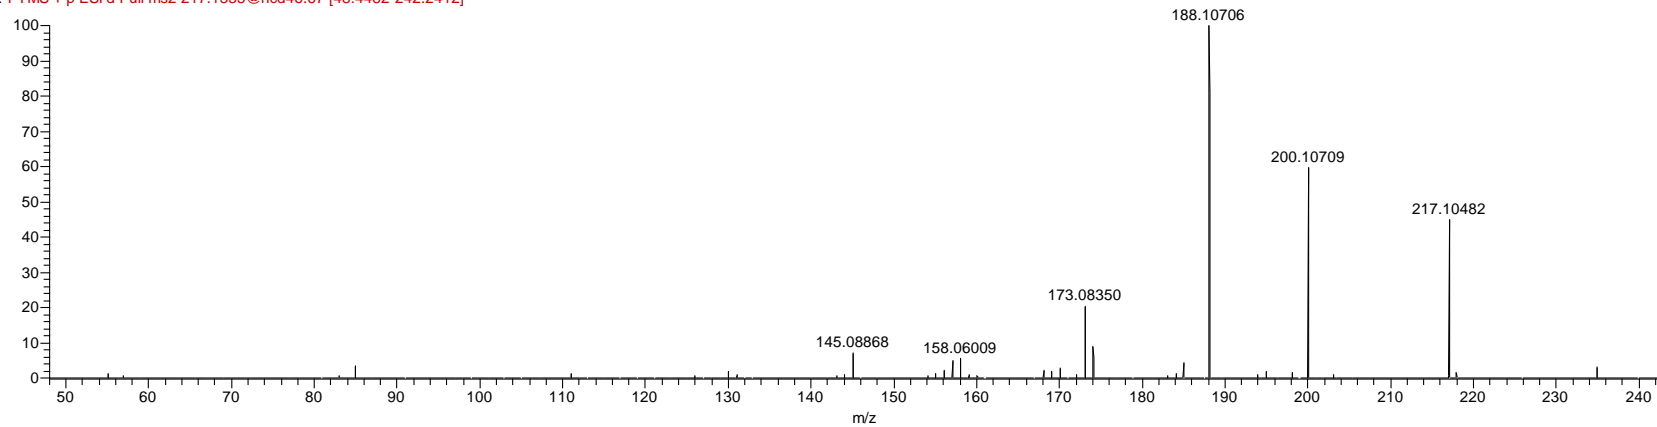

# Harmol

vaso\_FSddMS2\_150\_255\_01  
30mg/1ml 70/30 met/acqua

03/14/22 16:42:48

RT: 0.00 - 23.01 SM: 3G

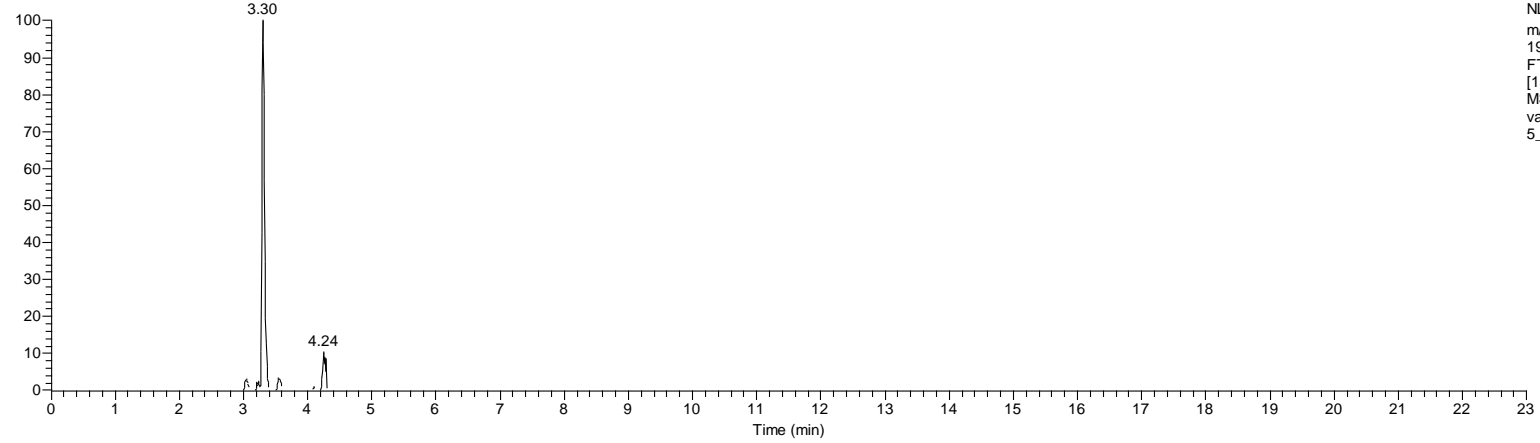

NL: 2.15E6  
m/z=  
199.08401-199.08799 F:  
FTMS + p ESI Full ms  
[150.0000-255.0000]  
MS  
vaso\_FSddMS2\_150\_25  
5\_01

vaso\_FSddMS2\_150\_255\_01 #1365-1456 RT: 3.18-3.38 AV: 5 SB: 11 2.33-3.08 NL: 2.50E5  
F: FTMS + p ESI d Full ms2 199.0294@hcd46.67 [44.7550-223.7750]

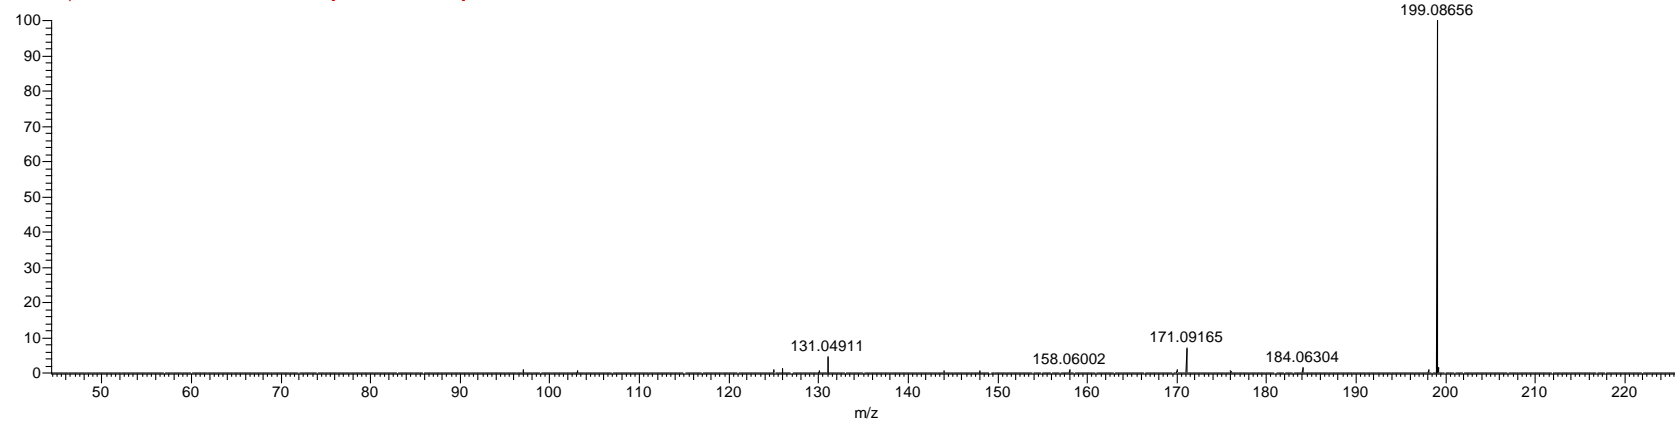

# Vasicine

vaso\_FSddMS2\_01  
30mg/1ml 70/30 met/acqua

03/14/22 16:18:45

RT: 0.00 - 23.00

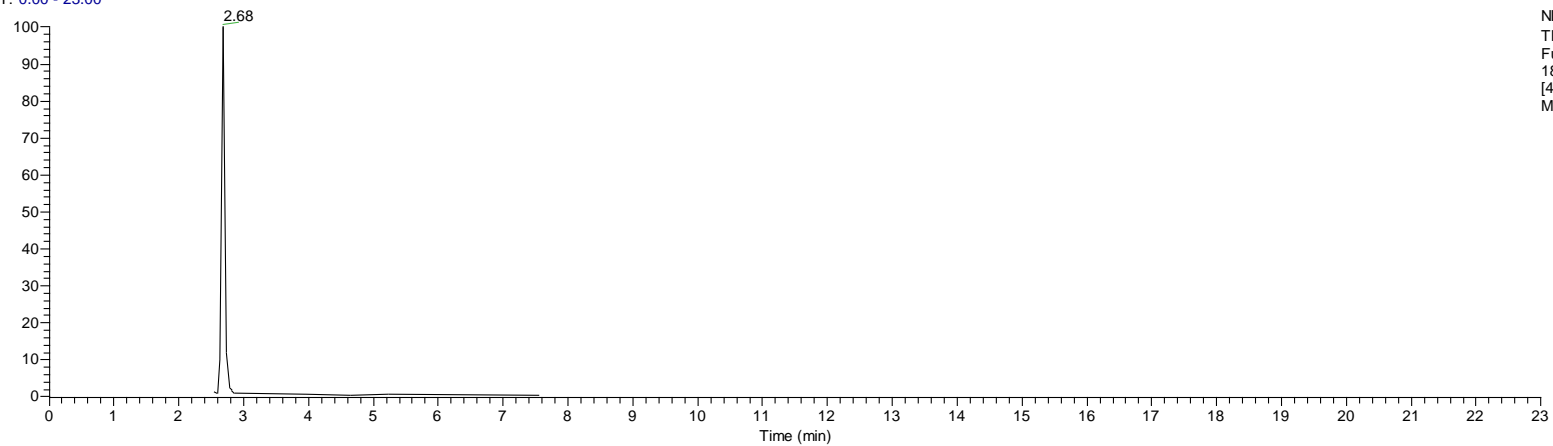

NL: 3.34E7  
TIC F: FTMS + p ESI d  
Full ms2  
189.1023@hcd46.67  
[42.7299-213.6493]  
MS vaso\_FSddMS2\_01

vaso\_FSddMS2\_01 #1106-1165 RT: 2.59-2.68 AV: 3 NL: 7.54E6  
F: FTMS + p ESI d Full ms2 189.1023@hcd46.67 [42.7299-213.6493]

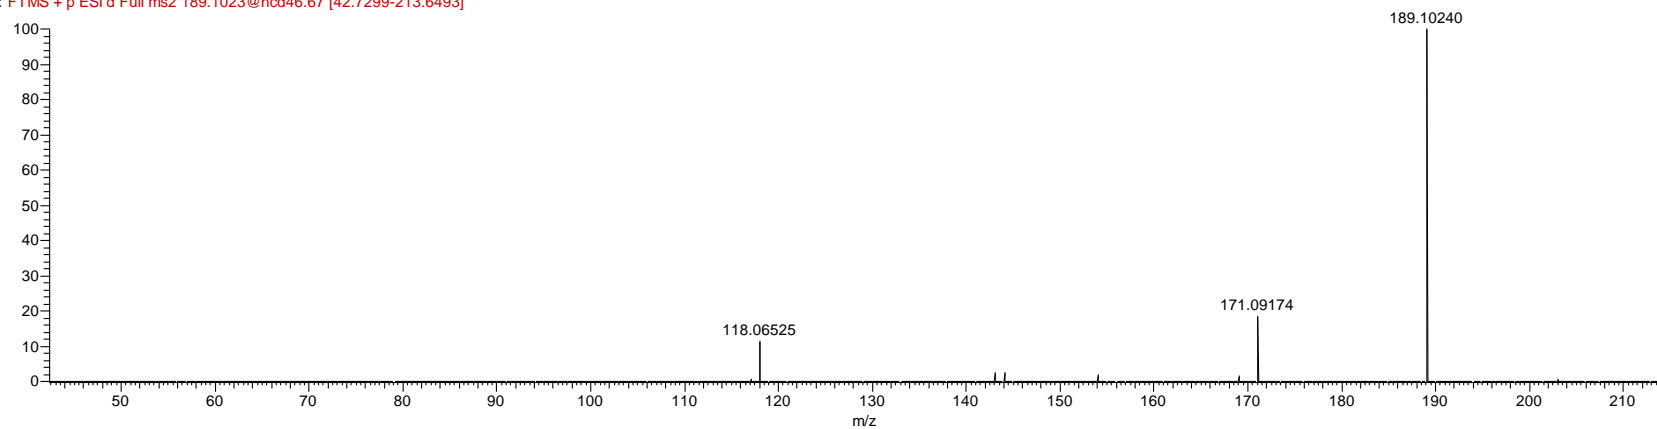



# Ruine (7-Methoxy-1-methyl-9H-beta-carboline-8-yl beta-D-glucopyranoside)

vaso\_FSddMS2\_245\_455\_01  
30mg/1ml 70/30 met/acqua

03/14/22 17:06:52

RT: 0.00 - 23.00 SM: 3G

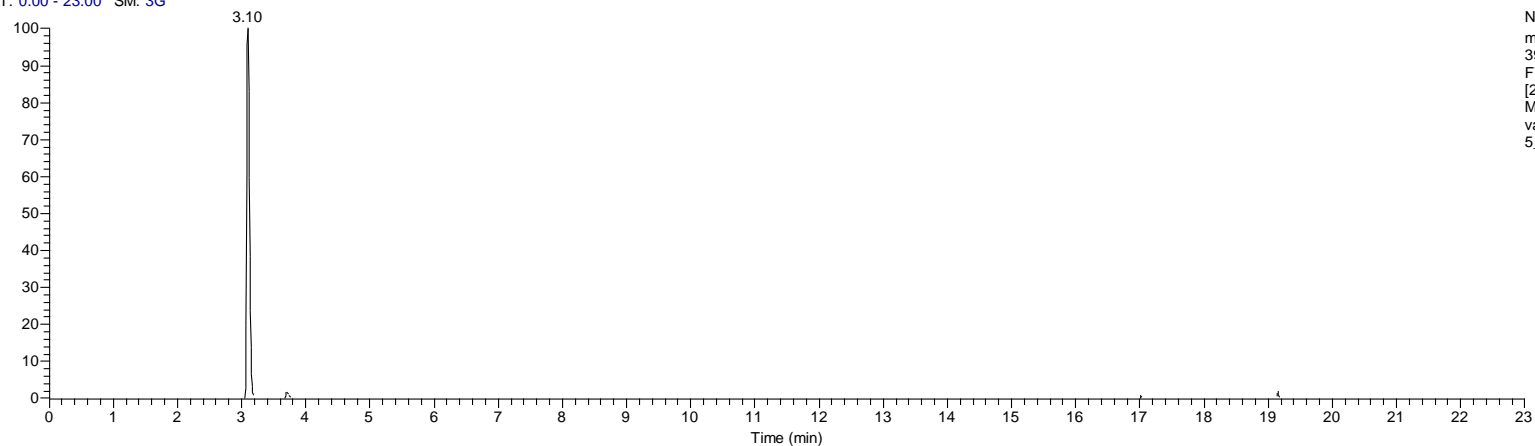

NL: 4.41E6  
m/z=  
391.14609-391.15391 F:  
FTMS + p ESI Full ms  
[245.0000-455.0000]  
MS  
vaso\_FSddMS2\_245\_45  
5\_01

vaso\_FSddMS2\_245\_455\_01 #1232 RT: 3.12 AV: 1 NL: 9.35E5  
F: FTMS + p ESI d Full ms2 391.1501@hcd46.67 [50.0000-419.7381]

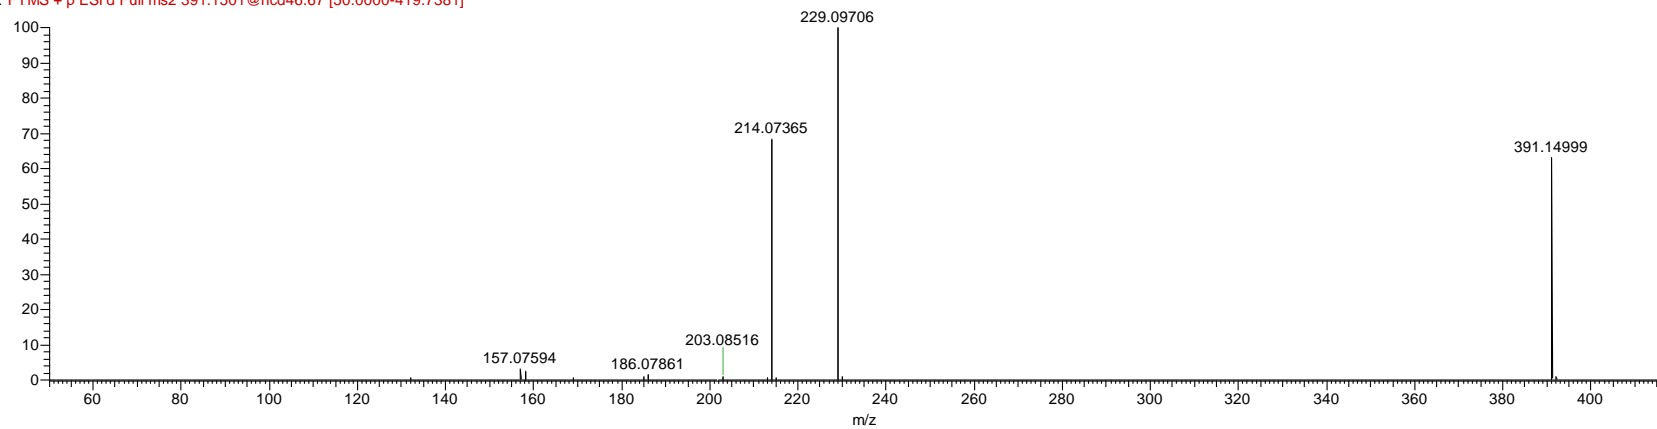

# Probable degradation of indole alkaloid (1-(6-methoxy-1H-indol-2-yl)ethan-1-imine)

vaso\_FSddMS2\_150\_255\_01  
30mg/1ml 70/30 met/acqua

03/14/22 16:42:48

RT: 0.00 - 23.01 SM: 15G

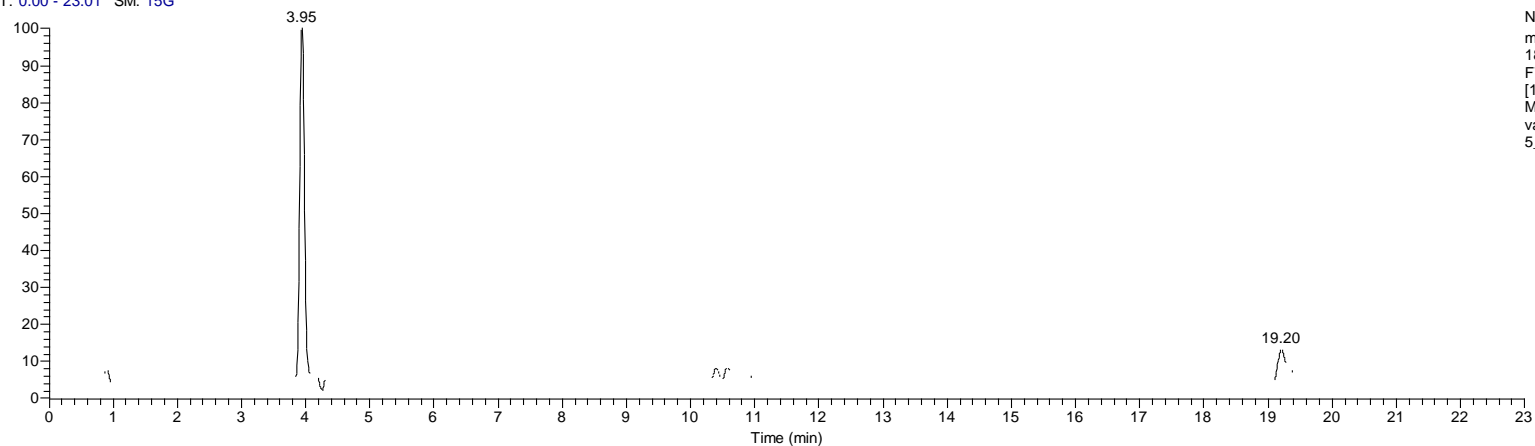

NL: 9.15E5  
m/z=  
188.10512-188.10888 F:  
FTMS + p ESI Full ms  
[150.0000-255.0000]  
MS  
vaso\_FSddMS2\_150\_25  
5\_01

vaso\_FSddMS2\_150\_255\_01 #1478-1777 RT: 3.92-3.99 AV: 2 SB: 2 2.33-3.08 NL: 2.26E5  
F: FTMS + p ESI d Full ms2 188.0706@hcd46.67 [42.5194-212.5971]

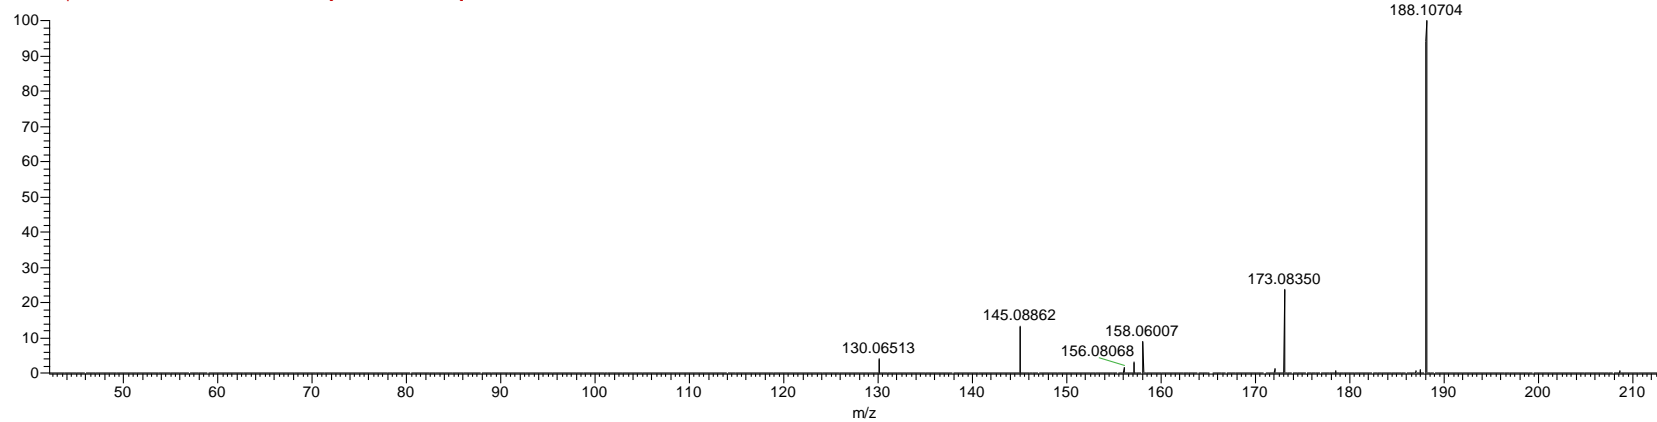

# Cytisine

C:\Users\...\vaso\_FSddMS2\_150\_255\_neg\_01  
30mg/1ml 70/30 met/acqua

03/15/22 12:21:25

RT: 0.00 - 23.00 SM: 7G

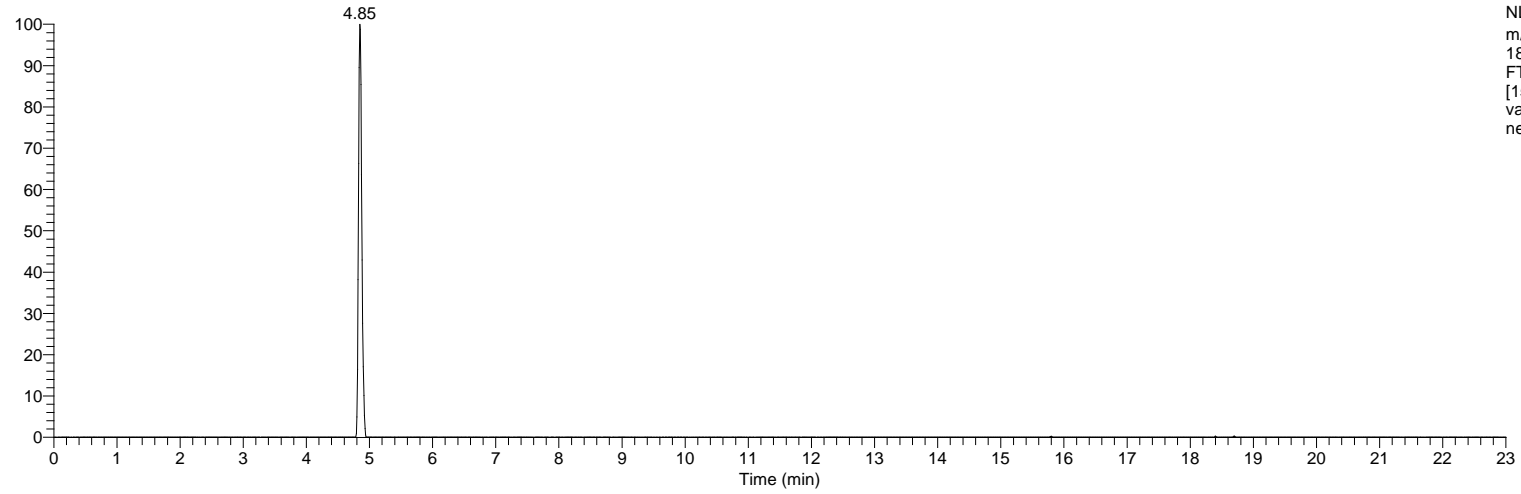

NL: 1.74E5  
m/z=  
189.10239-189.10447 F:  
FTMS - p ESI Full ms  
[150.0000-255.0000] MS  
vaso\_FSddMS2\_150\_255\_  
neg\_01

vaso\_FSddMS2\_150\_255\_neg\_01 #1836-1914 RT: 4.74-4.84 AV: 2 NL: 4.65E4  
F: FTMS - p ESI d Full ms2 189.0670@hcd46.67 [42.7227-213.6133]

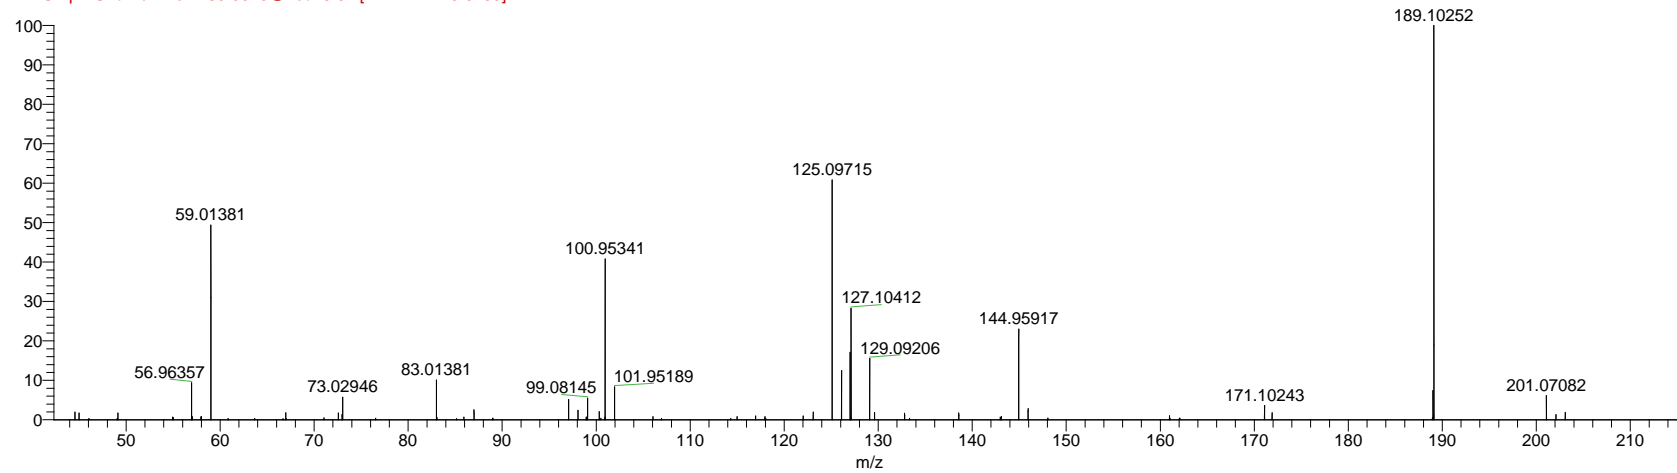

### Probable degradation of isoquinoline alkaloid (1,5-isoquinolinediol or isomer)

vaso\_FSddMS2\_150\_255\_01  
30mg/1ml 70/30 met/acqua

03/14/22 16:42:48

RT: 0.00 - 23.01 SM: 3G

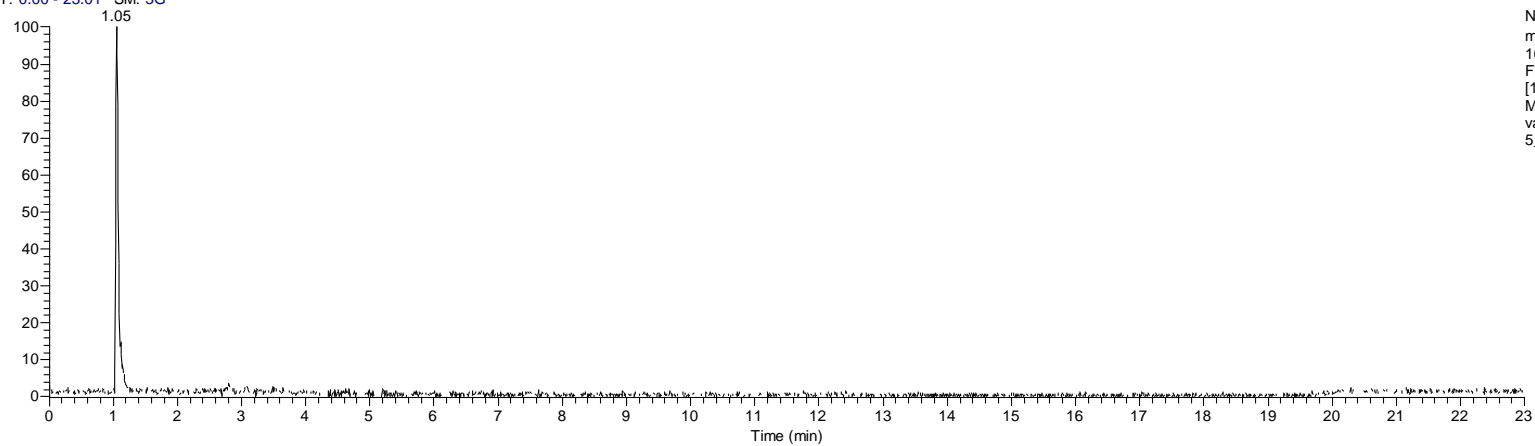

NL: 7.99E5  
m/z=  
162.05338-162.05662 F:  
FTMS + p ESI Full ms  
[150.0000-255.0000]  
MS  
vaso\_FSddMS2\_150\_25  
5\_01

vaso\_FSddMS2\_150\_255\_01 #345-462 RT: 0.95-1.06 AV: 5 NL: 4.30E5  
F: FTMS + p ESI d Full ms2 162.0762@hcd46.67 [40.0000-186.0827]

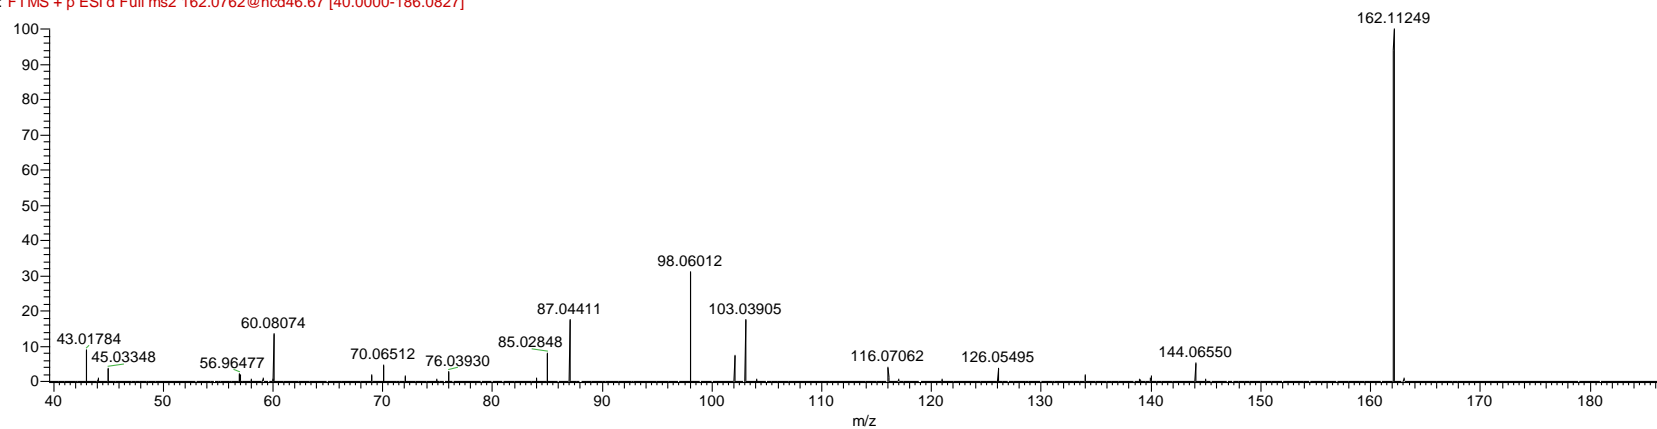

# Nicotine

vaso\_FSddMS2\_150\_255\_01  
30mg/1ml 70/30 met/acqua

03/14/22 16:42:48

RT: 0.00 - 23.01 SM: 15G

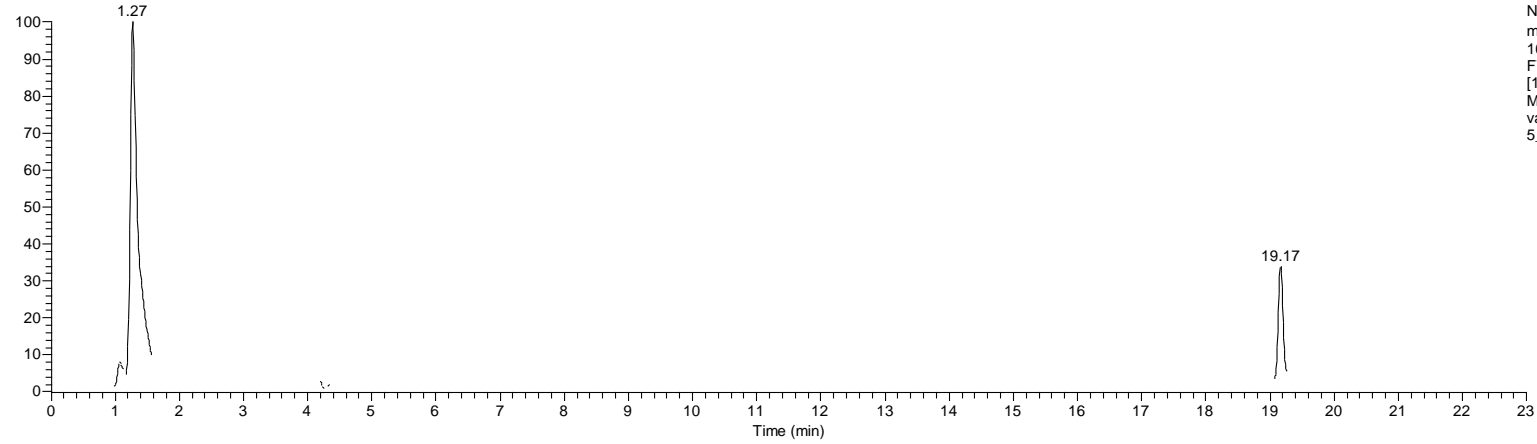

NL: 9.58E5  
m/z=  
163.12037-163.12363 F:  
FTMS + p ESI Full ms  
[150.0000-255.0000]  
MS  
vaso\_FSddMS2\_150\_25  
5\_01

vaso\_FSddMS2\_150\_255\_01 #417-557 RT: 1.25-1.30 AV: 2 SB: 1 1.65-2.50 NL: 2.64E5  
F: FTMS + p ESI d Full ms2 163.1230@hcd46.67 [40.0000-187.1505]

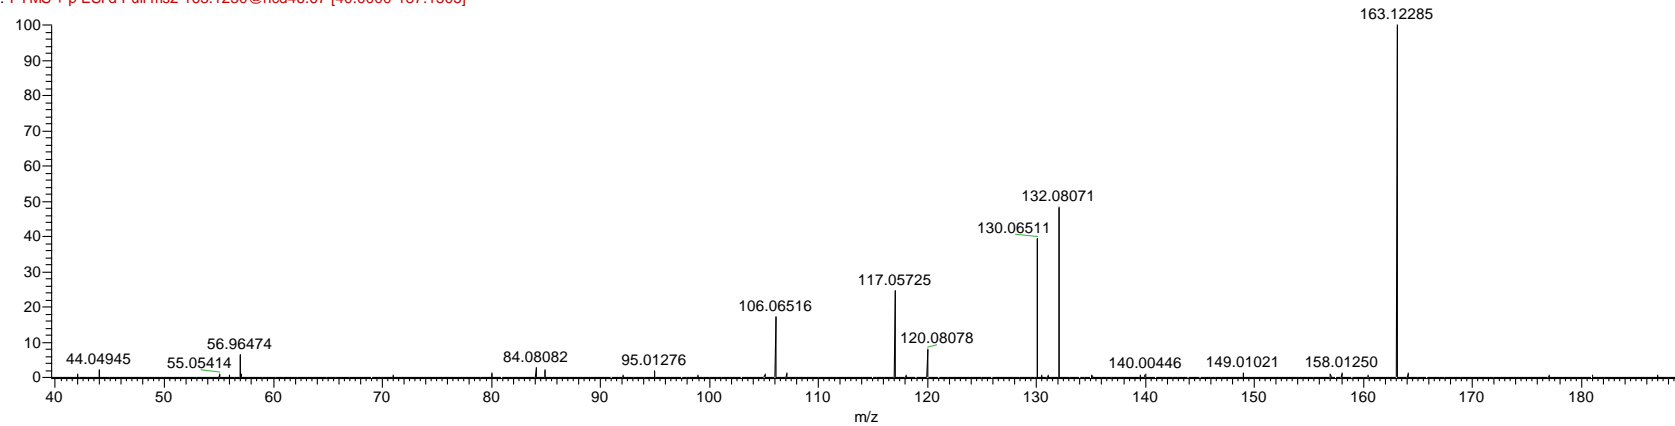

# Sinapine

vaso\_FSddMS2\_245\_455\_01  
30mg/1ml 70/30 met/acqua

03/14/22 17:06:52

RT: 0.00 - 23.00 SM: 15G

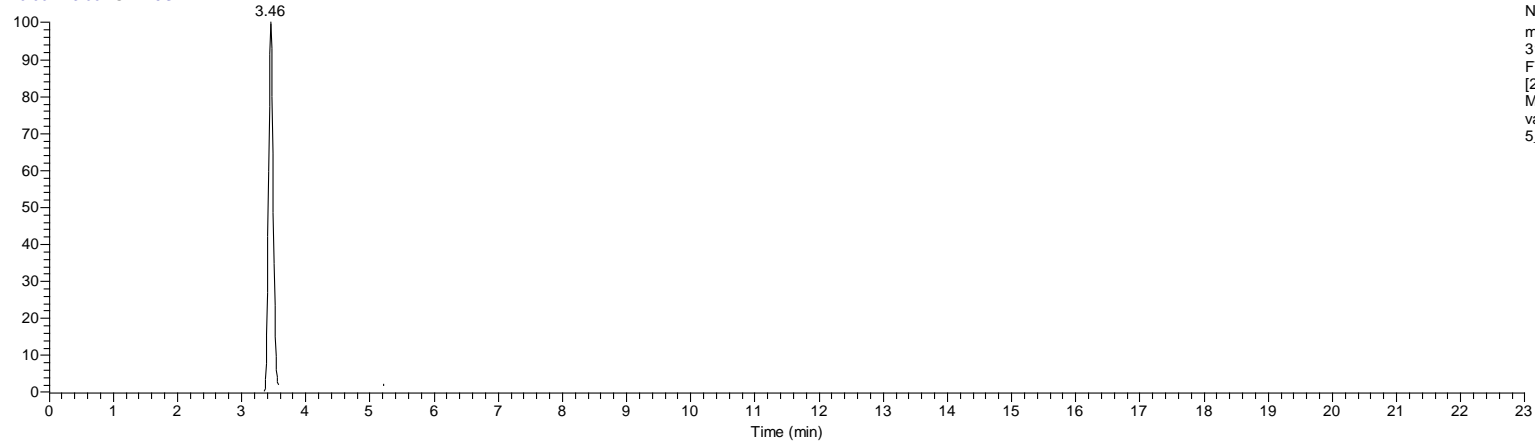

NL: 3.19E5  
m/z=  
310.16245-310.16555 F:  
FTMS + p ESI Full ms  
[245.0000-455.0000]  
MS  
vaso\_FSddMS2\_245\_45  
5\_01

vaso\_FSddMS2\_245\_455\_01 #1292-1390 RT: 3.45-3.48 AV: 2 SB: 4 5.55-8.24 , 1.27-3.73 NL: 9.67E4  
F: FTMS + p ESI d Full ms2 310.1341@hcd46.67 [50.0000-337.1018]

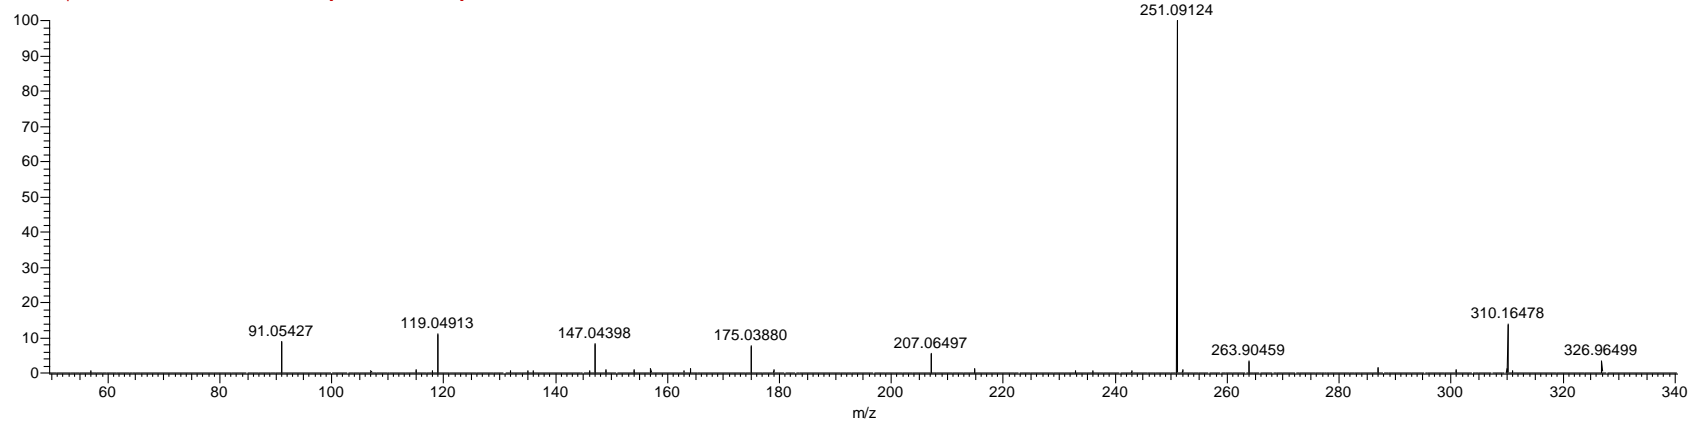

# Nupharidine

vaso\_FSddMS2\_245\_455\_01  
30mg/1ml 70/30 met/acqua

03/14/22 17:06:52

RT: 0.00 - 23.00 SM: 15G

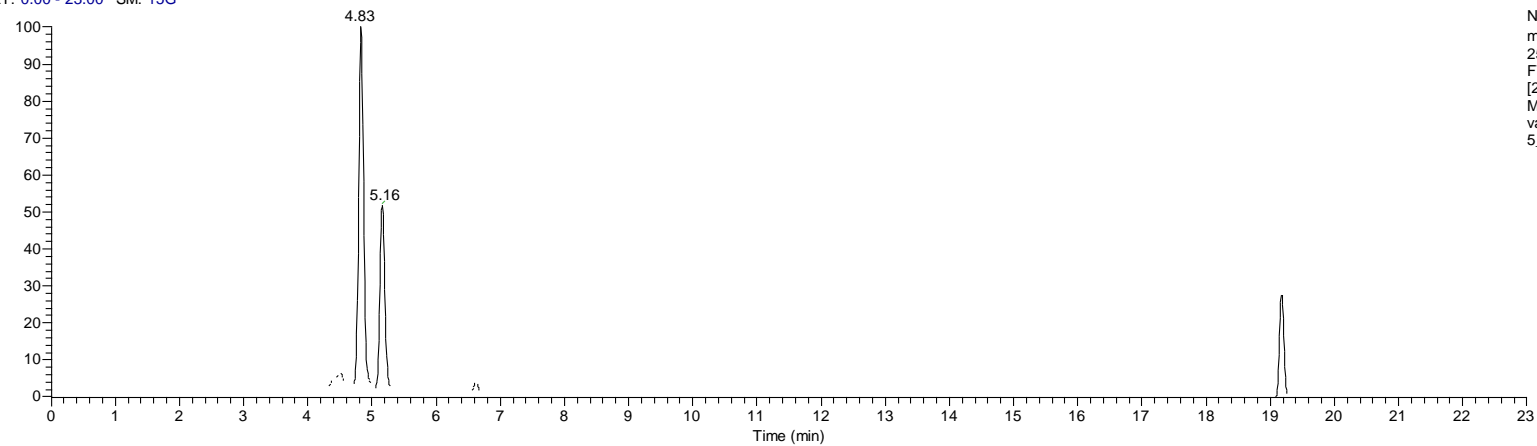

NL: 2.99E5  
m/z=  
250.17899-250.18149 F:  
FTMS + p ESI Full ms  
[245.0000-455.0000]  
MS  
vaso\_FSddMS2\_245\_45  
5\_01

vaso\_FSddMS2\_245\_455\_01 #1883-1949 RT: 4.82-4.86 AV: 2 NL: 1.32E5  
F: FTMS + p ESI d Full ms2 250.1802@hcd46.67 [50.0000-275.9488]

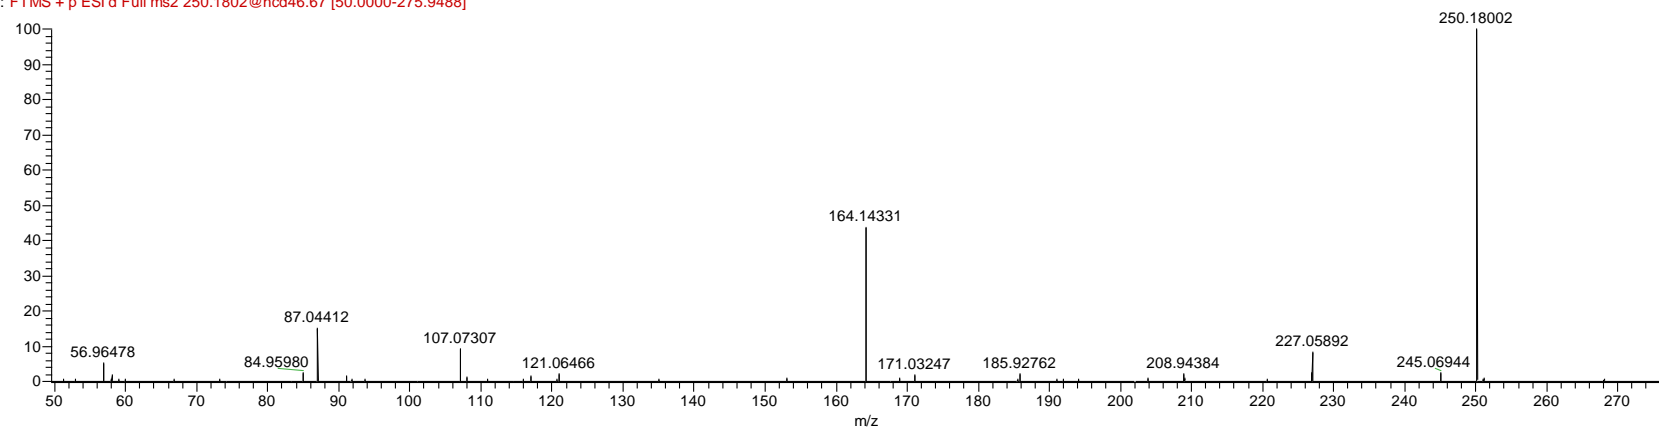

# Cellobiose

vaso\_FSddMS2\_245\_455\_neg\_01  
30mg/1ml 70/30 met/acqua

03/15/22 12:45:25

RT: 0.00 - 23.00 SM: 3G

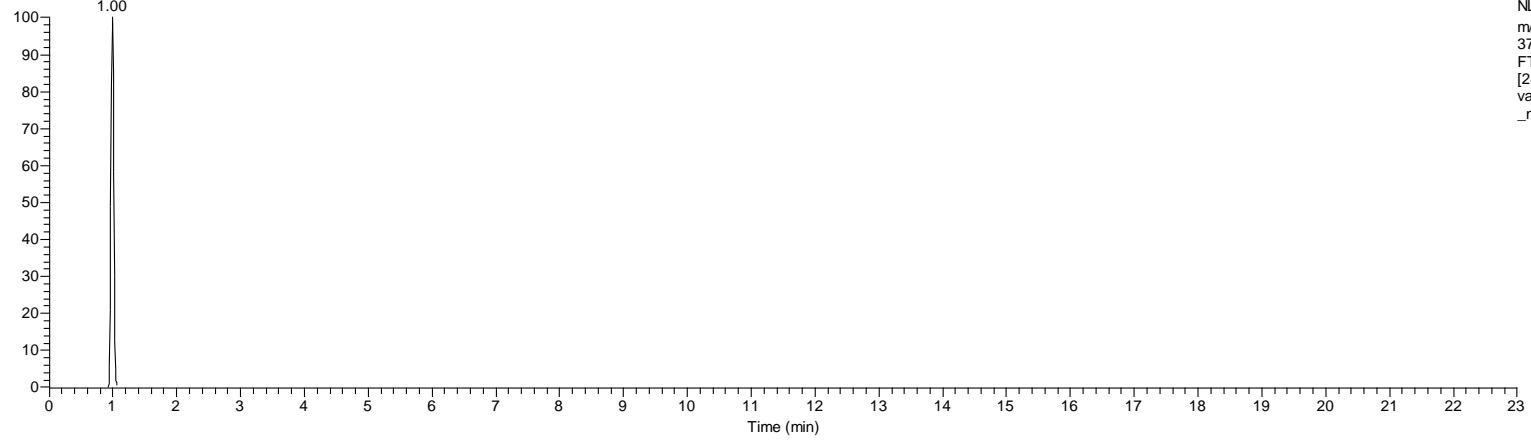

NL: 1.27E7  
m/z=  
377.08123-377.08877 F:  
FTMS - p ESI Full ms  
[245.0000-455.0000] MS  
vaso\_FSddMS2\_245\_455  
\_neg\_01

vaso\_FSddMS2\_245\_455\_neg\_01 #333-549 RT: 0.83-1.02 AV: 4 NL: 1.02E5  
F: FTMS - p ESI d Full ms2 377.0855@hcd46.67 [50.0000-405.3923]

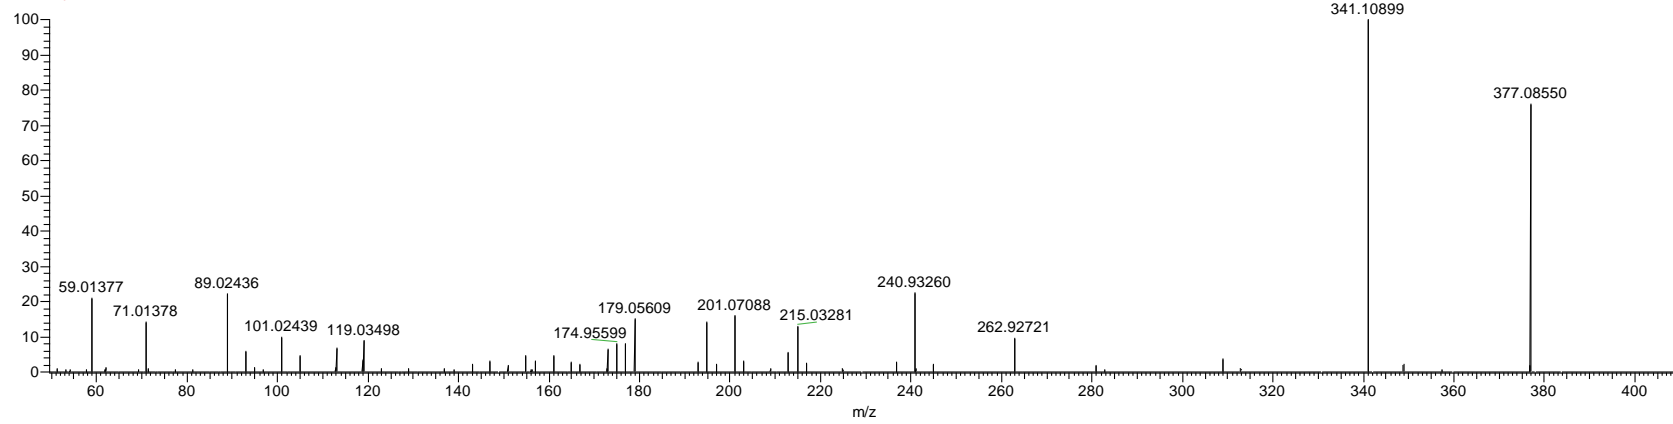



# Gluconic acid or isomer

vaso\_FSddMS2\_150\_255\_neg\_01  
30mg/1ml 70/30 met/acqua

03/15/22 12:21:25

RT: 0.00 - 23.00 SM: 15G

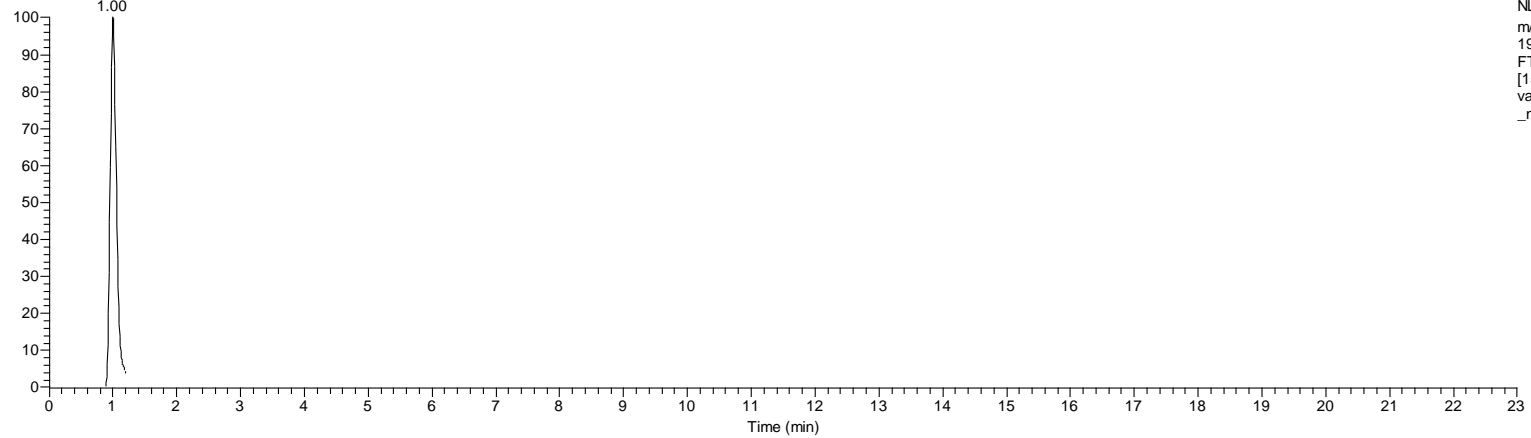

NL: 2.01E6  
m/z=  
195.04908-195.05298 F:  
FTMS - p ESI Full ms  
[150.0000-255.0000] MS  
vaso\_FSddMS2\_150\_255  
\_neg\_01

vaso\_FSddMS2\_150\_255\_neg\_01 #357 RT: 1.01 AV: 1 NL: 4.29E5  
F: FTMS - p ESI d Full ms2 195.1391@hcd46.67 [43.9614-219.8069]

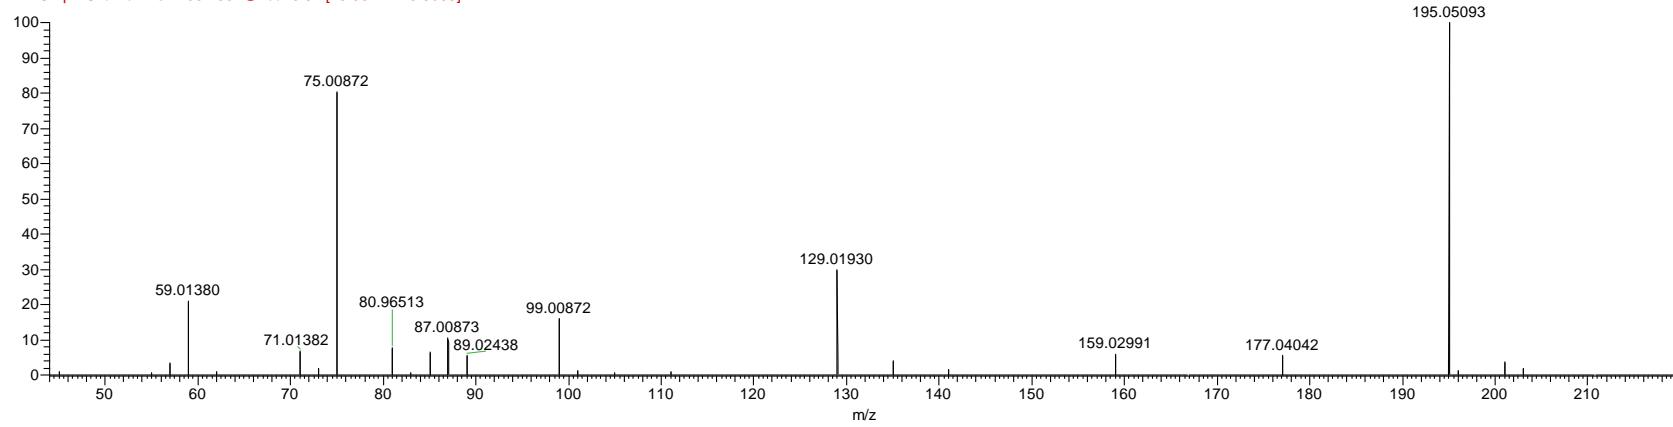

# Hexitol

vaso\_FSddMS2\_150\_255\_neg\_01  
30mg/1ml 70/30 met/acqua

03/15/22 12:21:25

RT: 0.00 - 23.00 SM: 15G

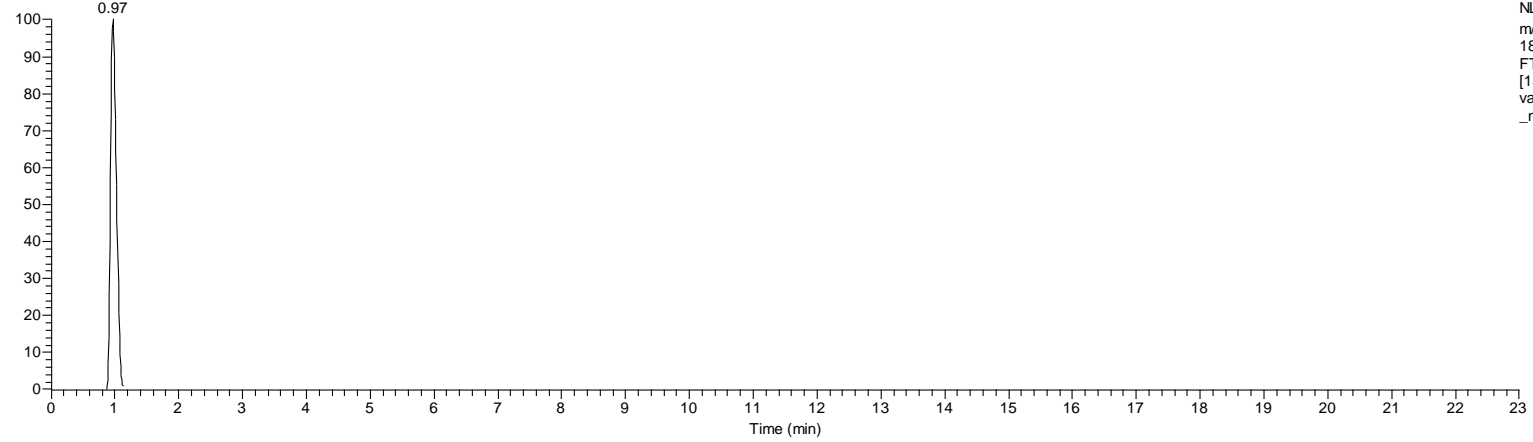

NL: 1.06E6  
m/z=  
181.06999-181.07361 F:  
FTMS - p ESI Full ms  
[150.0000-255.0000] MS  
vaso\_FSddMS2\_150\_255  
\_neg\_01

vaso\_FSddMS2\_150\_255\_neg\_01 #269-368 RT: 0.81-0.99 AV: 5 SB: 37 1.14-2.19, 0.22-0.71 NL: 3.71E4  
F: FTMS - p ESI d Full ms2 181.0718@hcd46.67 [41.0916-205.4582]

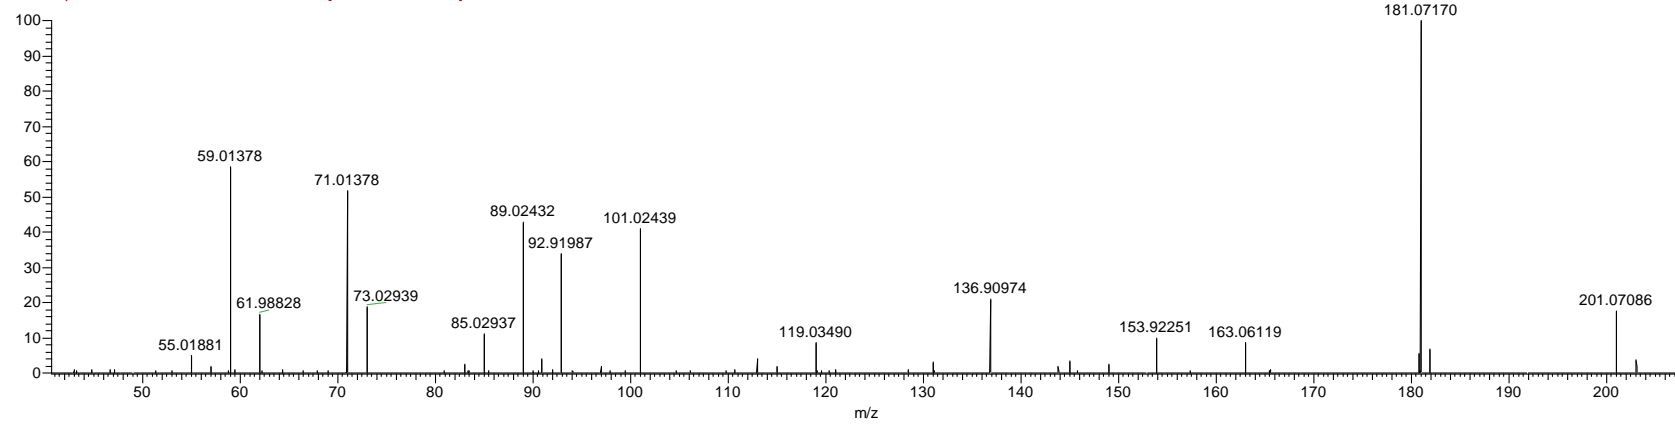

# Trisaccharide (tree hexose units)

vaso\_FSddMS2\_445\_850\_neg\_01  
30mg/1ml 70/30 met/acqua

03/15/22 13:09:26

RT: 0.00 - 23.00 SM: 15G

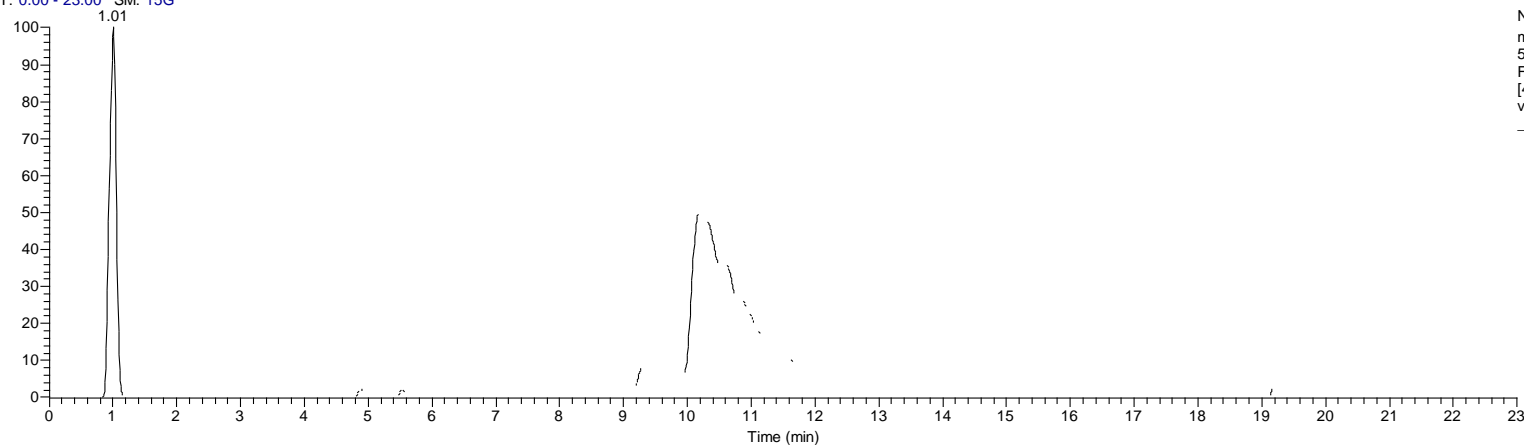

NL: 2.28E5  
m/z=  
503.14100-503.18100 F:  
FTMS - p ESI Full ms  
[445.0000-850.0000] MS  
vaso\_FSddMS2\_445\_850  
\_neg\_01

vaso\_FSddMS2\_445\_850\_neg\_01 #337-448 RT: 1.00-1.04 AV: 2 SB: 19 0.32-0.54 , 1.34-13.23 NL: 5.60E4  
F: FTMS - p ESI d Full ms2 503.1185@hcd46.67 [53.3946-533.9459]

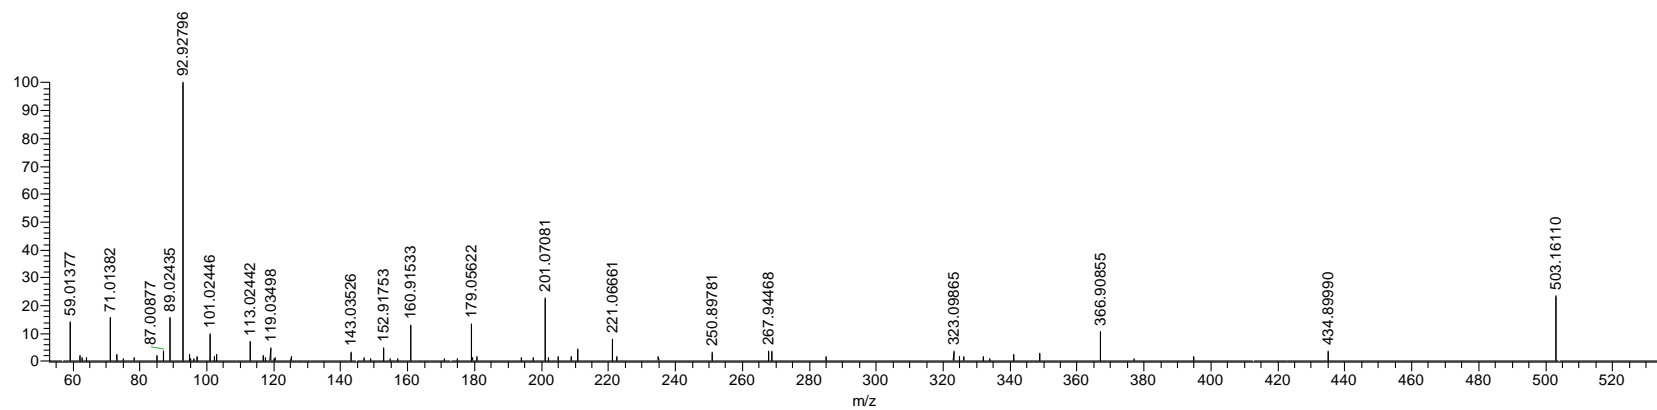

# Xylitol

vaso\_FSddMS2\_150\_255\_neg\_01  
30mg/1ml 70/30 met/acqua

03/15/22 12:21:25

RT: 0.00 - 23.00 SM: 15G

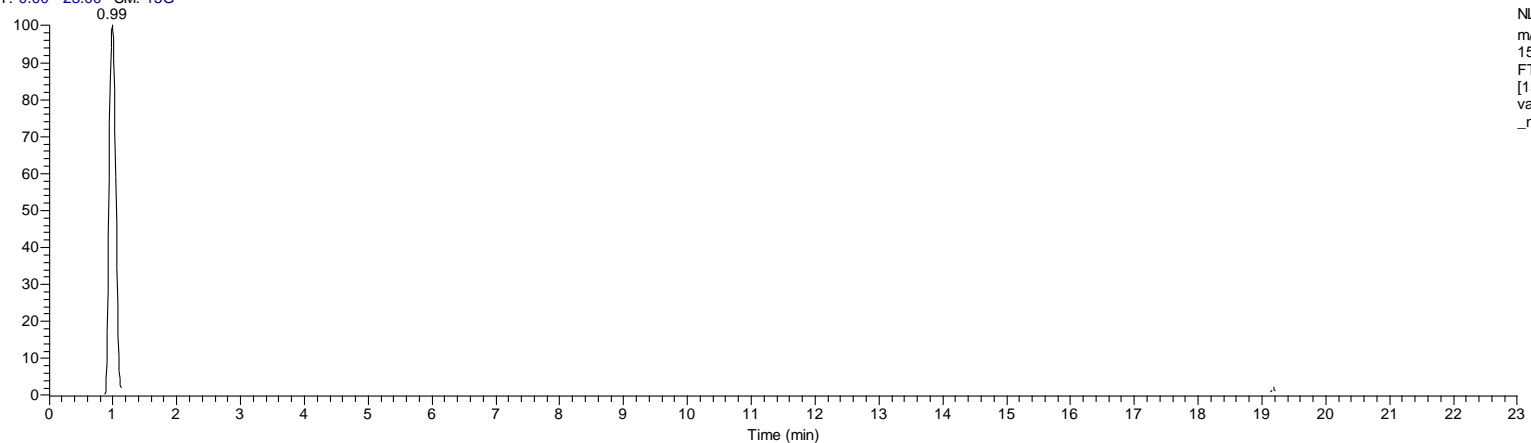

NL: 4.51E5  
m/z=  
151.05975-151.06277 F:  
FTMS - p ESI Full ms  
[150.0000-255.0000] MS  
vaso\_FSddMS2\_150\_255  
\_neg\_01

vaso\_FSddMS2\_150\_255\_neg\_01 #281-390 RT: 0.96-1.02 AV: 3 NL: 1.65E5  
F: FTMS - p ESI d Full ms2 150.9829@hcd46.67 [40.0000-174.7675]

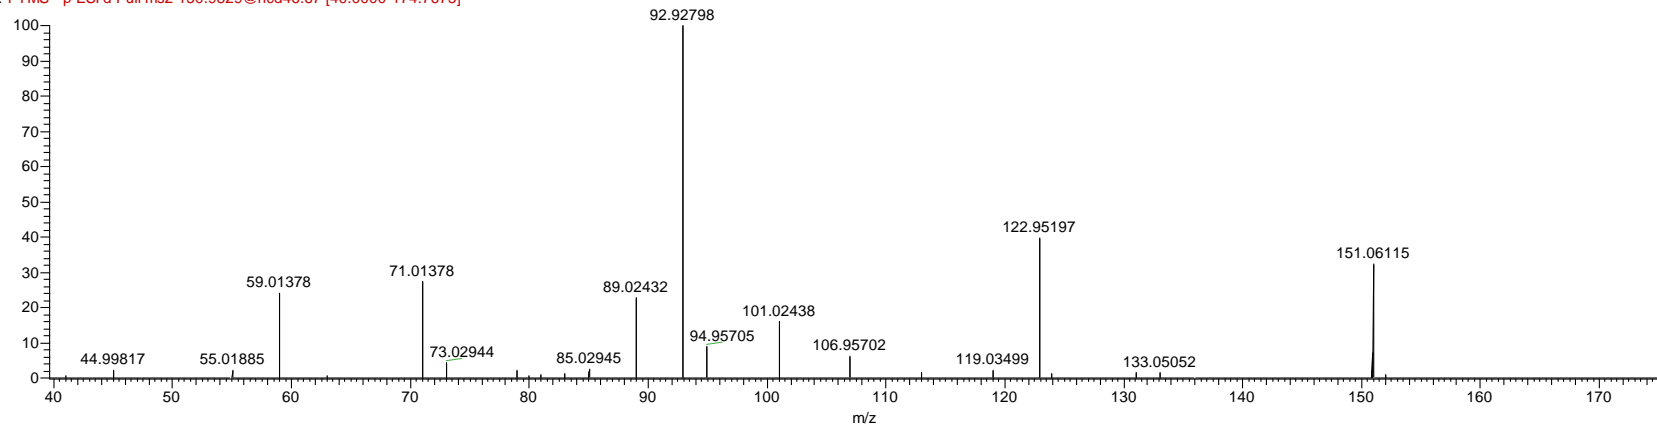

# Chitobiose

vaso\_FSddMS2\_245\_455\_01  
30mg/1ml 70/30 met/acqua

03/14/22 17:06:52

RT: 0.00 - 23.00 SM: 15G

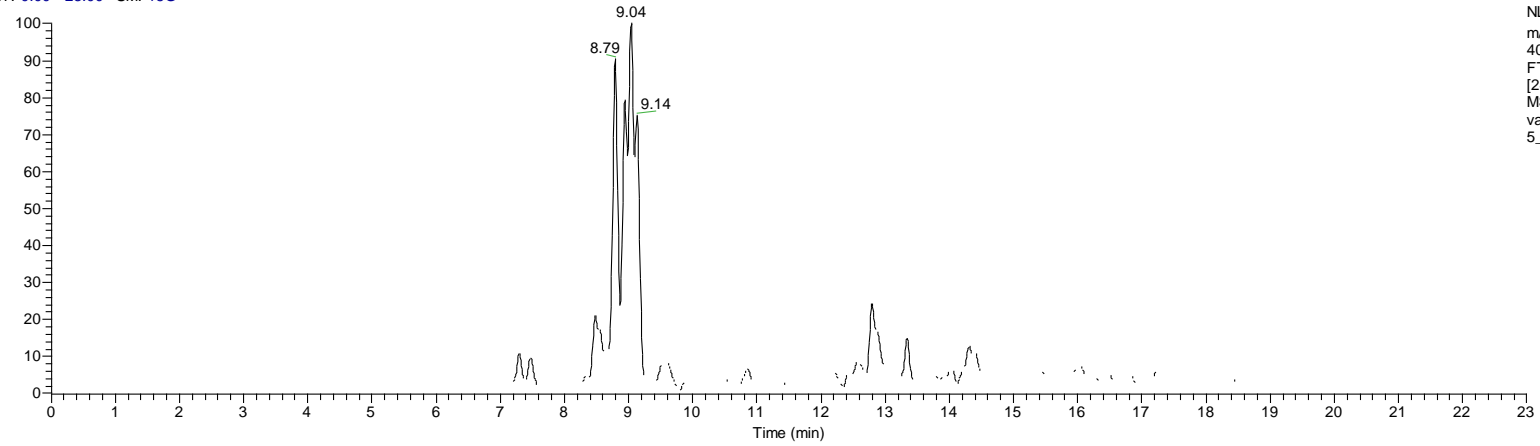

NL: 1.76E5  
m/z=  
407.23796-407.24204 F:  
FTMS + p ESI Full ms  
[245.0000-455.0000]  
MS  
vaso\_FSddMS2\_245\_45  
5\_01

vaso\_FSddMS2\_245\_455\_01 #3560-3612 RT: 8.83-8.93 AV: 2 SB: 1 5.55-8.24 , 1.27-3.73 NL: 4.95E4  
F: FTMS + p ESI d Full ms2 407.2404@hcd46.67 [50.0000-436.1502]

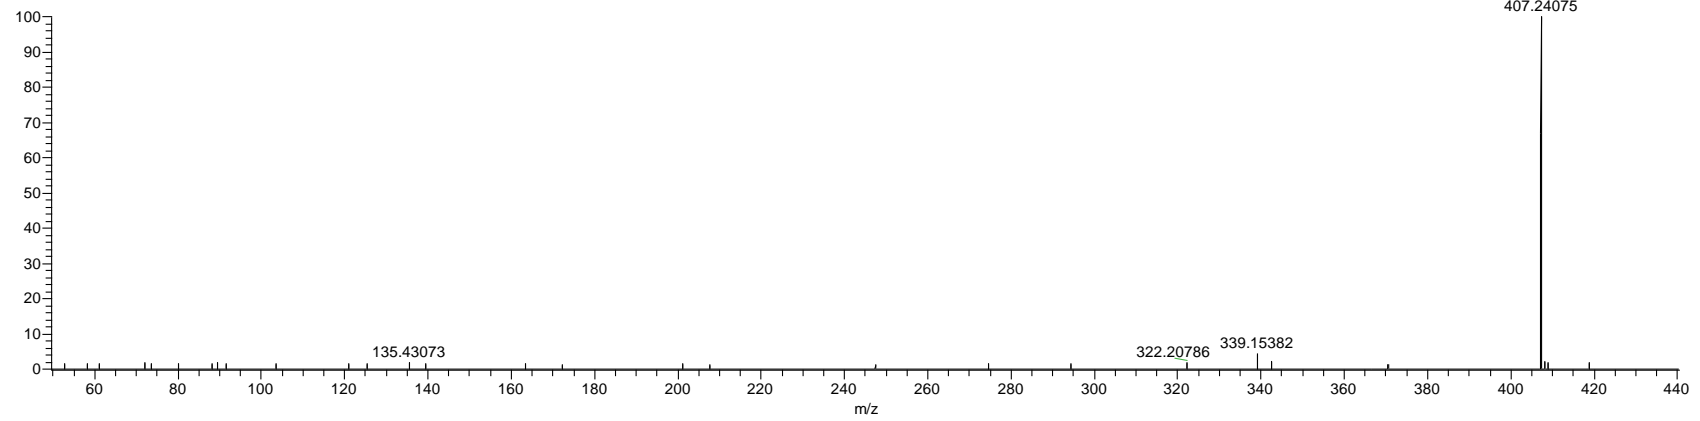

# Gallic acid

vaso\_FSddMS2\_150\_255\_neg\_01  
30mg/1ml 70/30 met/acqua

03/15/22 12:21:25

RT: 0.00 - 23.00 SM: 15G  
1.69

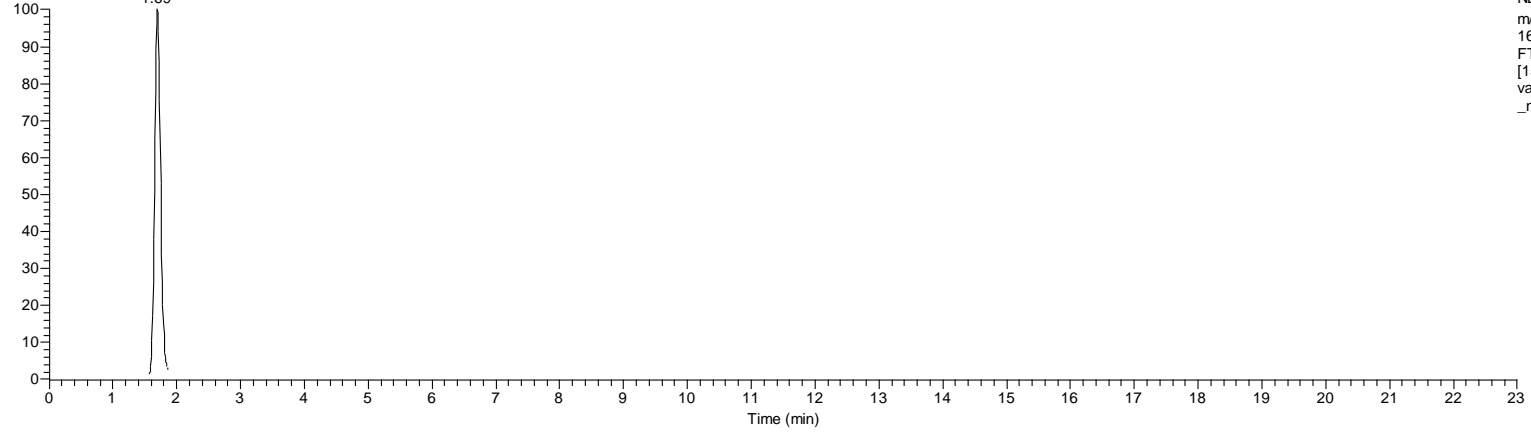

NL: 2.19E6  
m/z=  
169.01262-169.01600 F:  
FTMS - p ESI Full ms  
[150.0000-255.0000] MS  
vaso\_FSddMS2\_150\_255  
\_neg\_01

vaso\_FSddMS2\_150\_255\_neg\_01 #637-673 RT: 1.68-1.73 AV: 2 NL: 4.93E5  
F: FTMS - p ESI d Full ms2 169.1234@hcd46.67 [40.0000-193.2709]

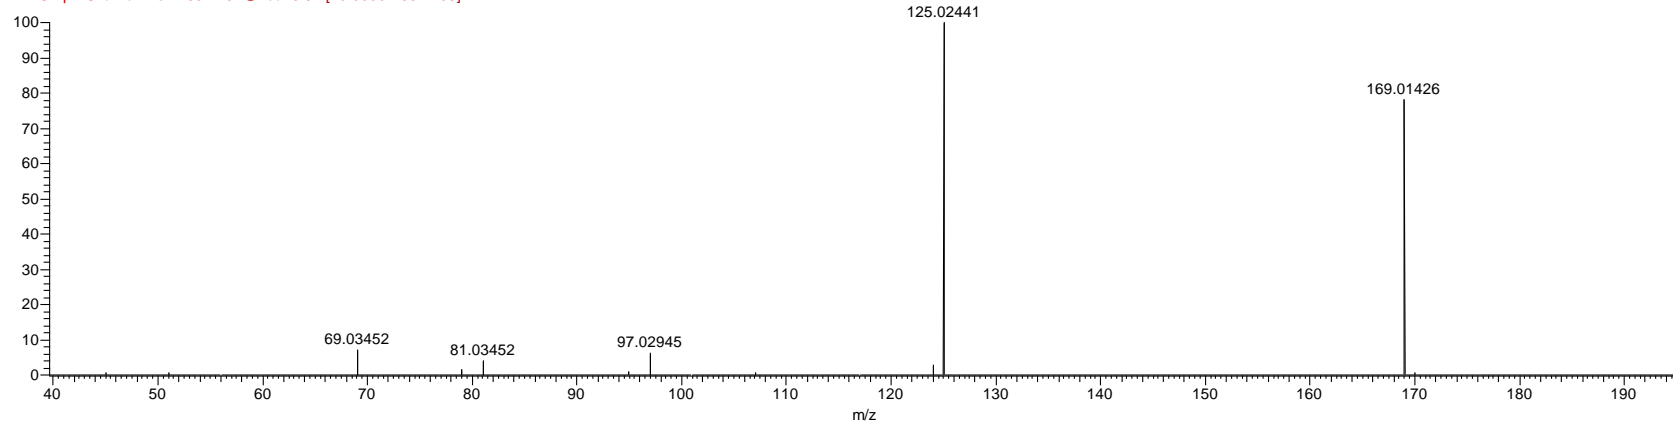

# 1,2,3,6-Tetra-O-galloyl- $\beta$ -D-glucose

vaso\_FSddMS2\_445\_850\_neg\_01  
30mg/1ml 70/30 met/acqua

03/15/22 13:09:26

RT: 0.00 - 23.00 SM: 15G

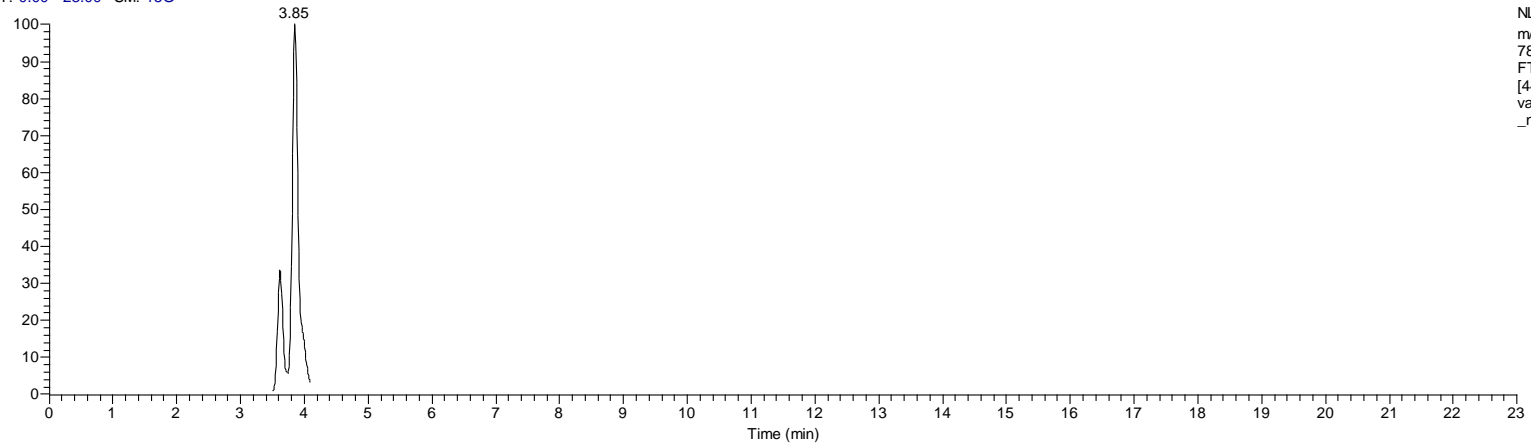

NL: 8.37E5  
m/z=  
787.09400-787.10400 F:  
FTMS - p ESI Full ms  
[445.0000-850.0000] MS  
vaso\_FSddMS2\_445\_850  
\_neg\_01

vaso\_FSddMS2\_445\_850\_neg\_01 #1492 RT: 3.83 AV: 1 SB: 6 3.72-6.78 , 1.14-2.26 NL: 1.31E5  
F: FTMS - p ESI d Full ms2 787.0994@hcd46.67 [82.3606-823.6064]

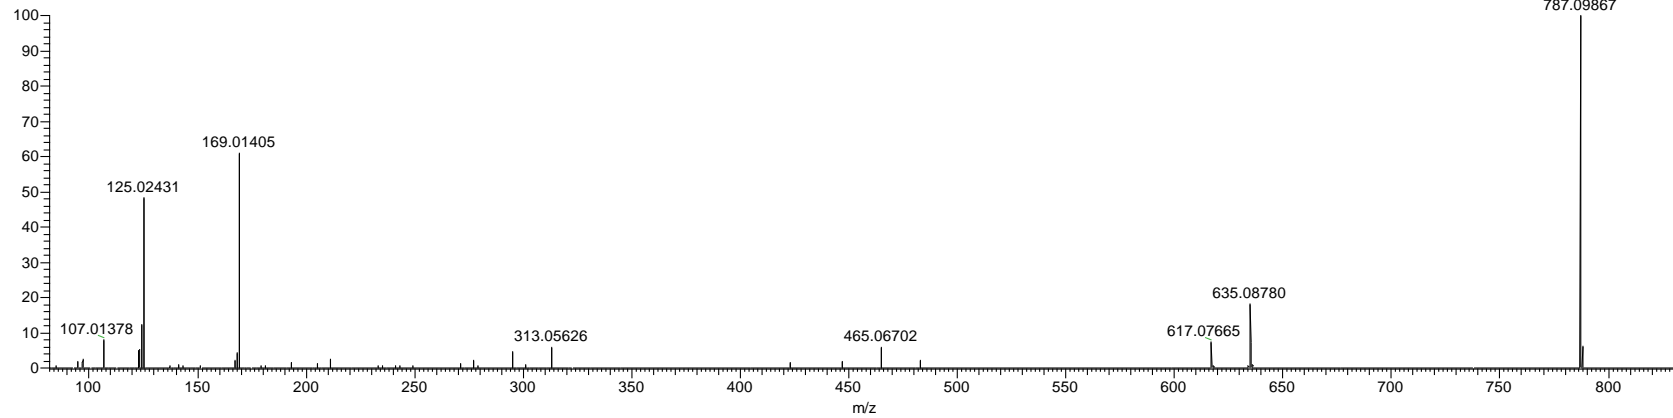

# 1-O,6-O-digalloyl- $\beta$ -D-glucose

vaso\_FSddMS2\_445\_850\_neg\_01  
30mg/1ml 70/30 met/acqua

03/15/22 13:09:26

RT: 0.00 - 23.00 SM: 15G

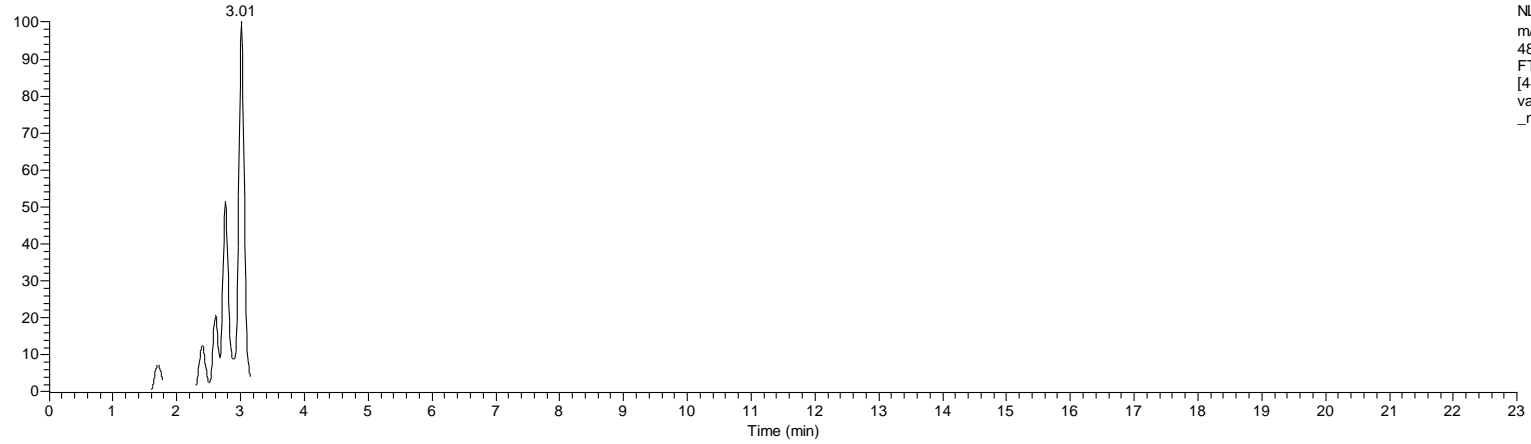

NL: 3.94E5  
m/z=  
483.07300-483.08300 F:  
FTMS - p ESI Full ms  
[445.0000-850.0000] MS  
vaso\_FSddMS2\_445\_850  
\_neg\_01

vaso\_FSddMS2\_445\_850\_neg\_01 #1132 RT: 2.99 AV: 1 SB: 3 3.72-6.78 , 1.14-2.26 NL: 5.63E4  
F: FTMS - p ESI d Full ms2 483.0781@hcd46.67 [51.3505-513.5047]

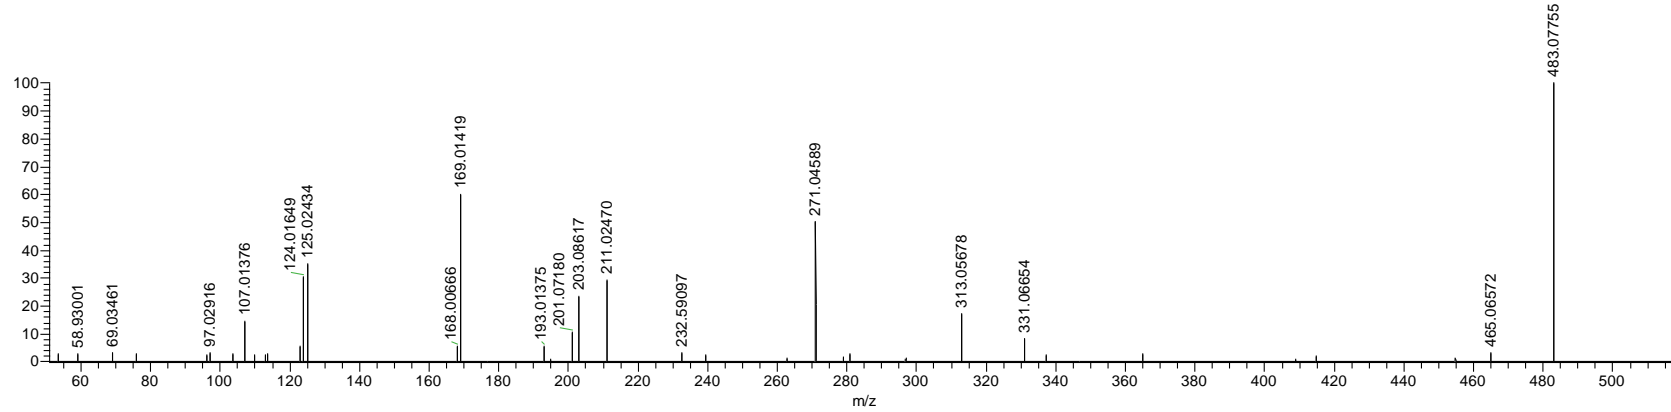



# 9,12,13-Trihydroxy-15-octadecenoic acid

vaso\_FSddMS2\_245\_455\_neg\_01  
30mg/1ml 70/30 met/acqua

03/15/22 12:45:25

RT: 0.00 - 23.00 SM: 15G

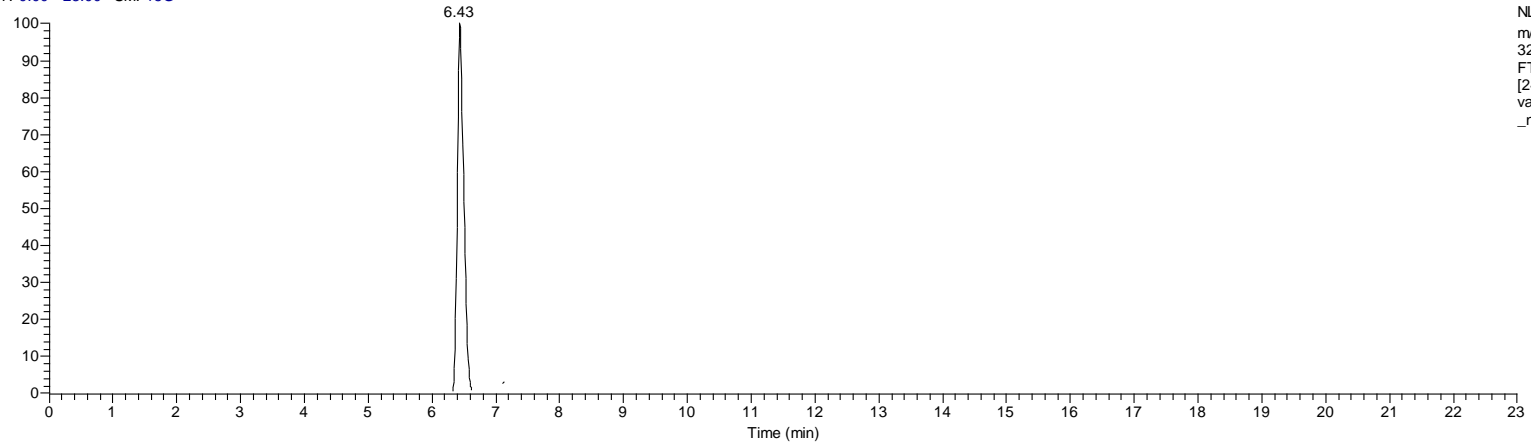

NL: 1.43E7  
m/z=  
329.23005-329.23663 F:  
FTMS - p ESI Full ms  
[245.0000-455.0000] MS  
vaso\_FSddMS2\_245\_455  
\_neg\_01

vaso\_FSddMS2\_245\_455\_neg\_01 #2617-2762 RT: 6.36-6.52 AV: 4 NL: 2.50E6  
F: FTMS - p ESI d Full ms2 329.2334@hcd46.67 [50.0000-356.5831]

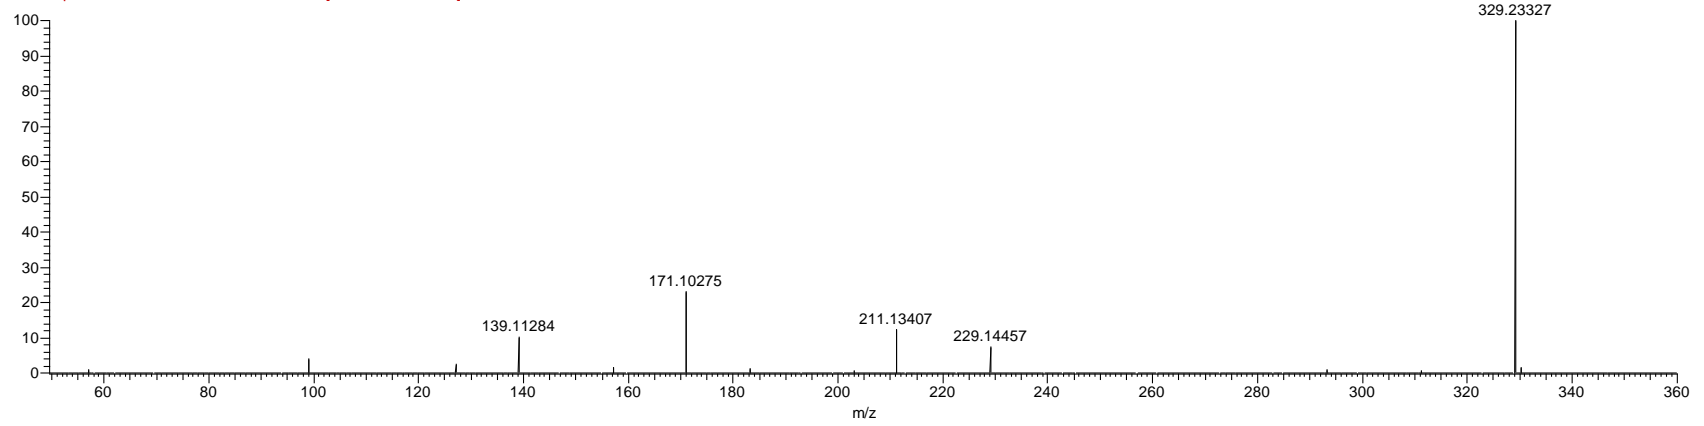

# Pinolenic acid

vaso\_FSddMS2\_245\_455\_01  
30mg/1ml 70/30 met/acqua

03/14/22 17:06:52

RT: 0.00 - 23.00 SM: 15G

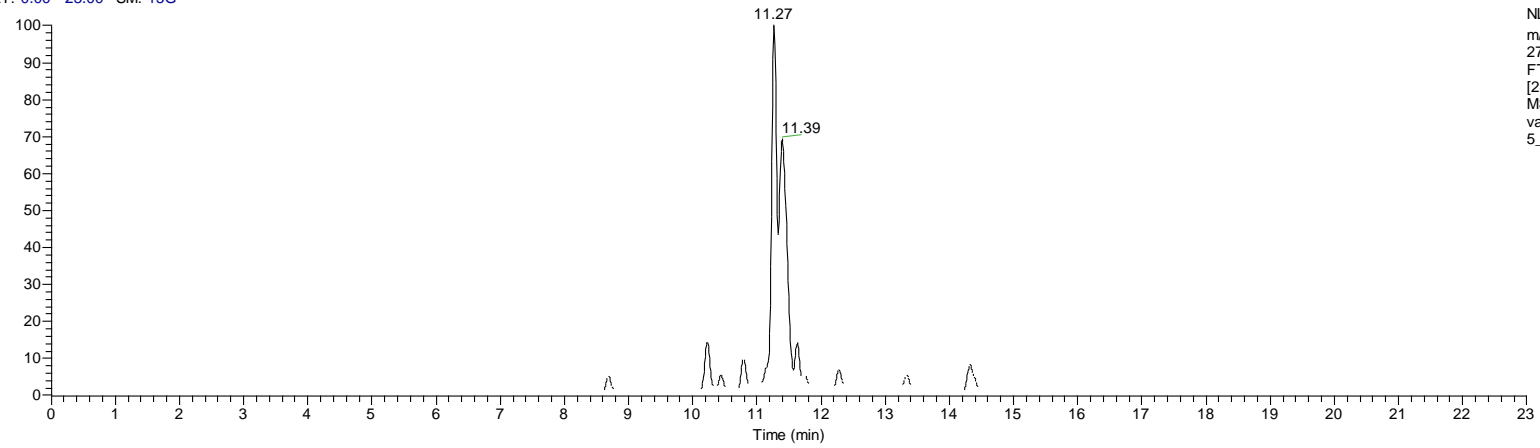

NL: 3.88E6  
m/z=  
279.22914-279.23472 F:  
FTMS + p ESI Full ms  
[245.0000-455.0000]  
MS  
vaso\_FSddMS2\_245\_45  
5\_01

vaso\_FSddMS2\_245\_455\_01 #4502-4661 RT: 11.06-11.40 AV: 12 NL: 4.79E5  
F: FTMS + p ESI d Full ms2 279.1567@hcd46.67 [50.0000-305.5048]

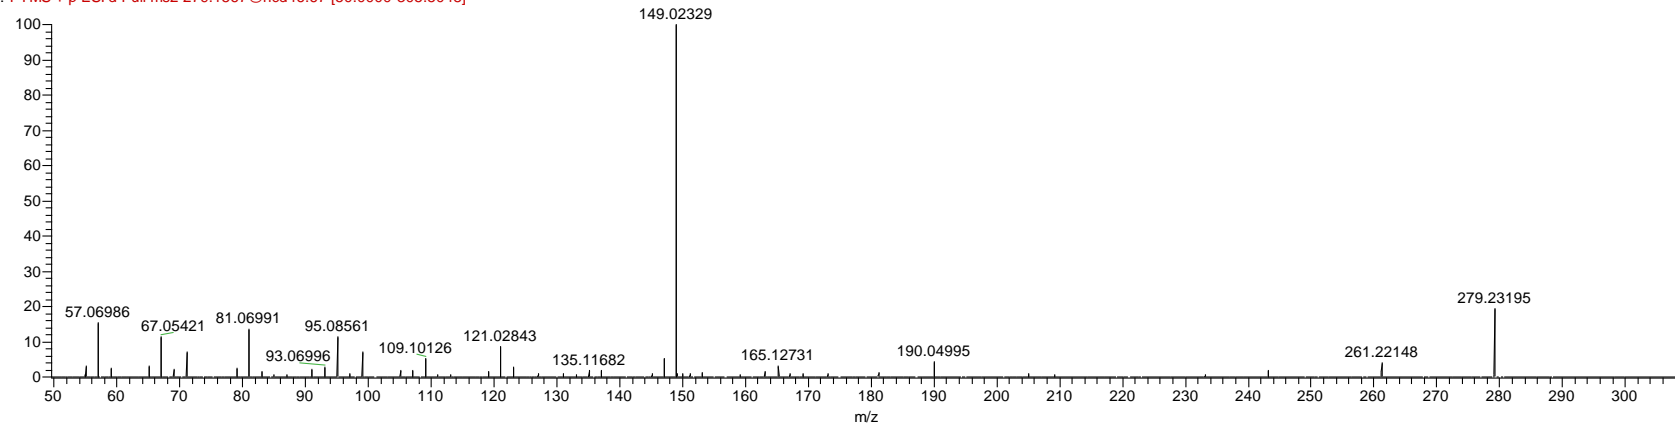

# Suberic acid

vaso\_FSddMS2\_150\_255\_neg\_01  
30mg/1ml 70/30 met/acqua

03/15/22 12:21:25

RT: 0.00 - 23.00 SM: 3G

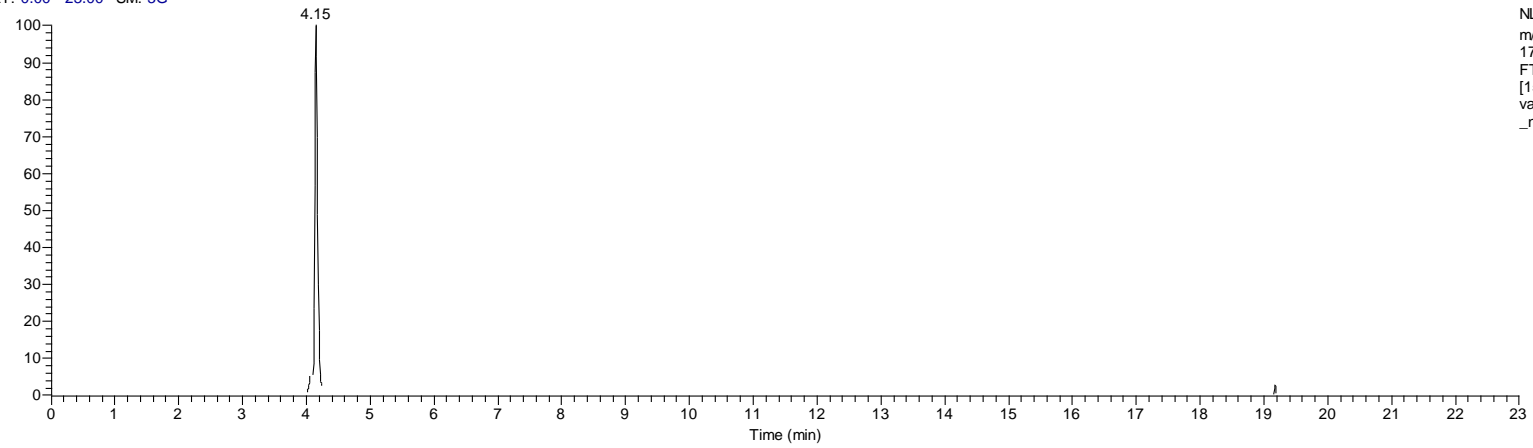

NL: 6.82E6  
m/z=  
173.08024-173.08370 F:  
FTMS - p ESI Full ms  
[150.0000-255.0000] MS  
vaso\_FSddMS2\_150\_255  
\_neg\_01

vaso\_FSddMS2\_150\_255\_neg\_01 #1554-1632 RT: 4.03-4.20 AV: 6 NL: 1.44E6  
F: FTMS - p ESI d Full ms2 173.0819@hcd46.67 [40.0000-197.3086]

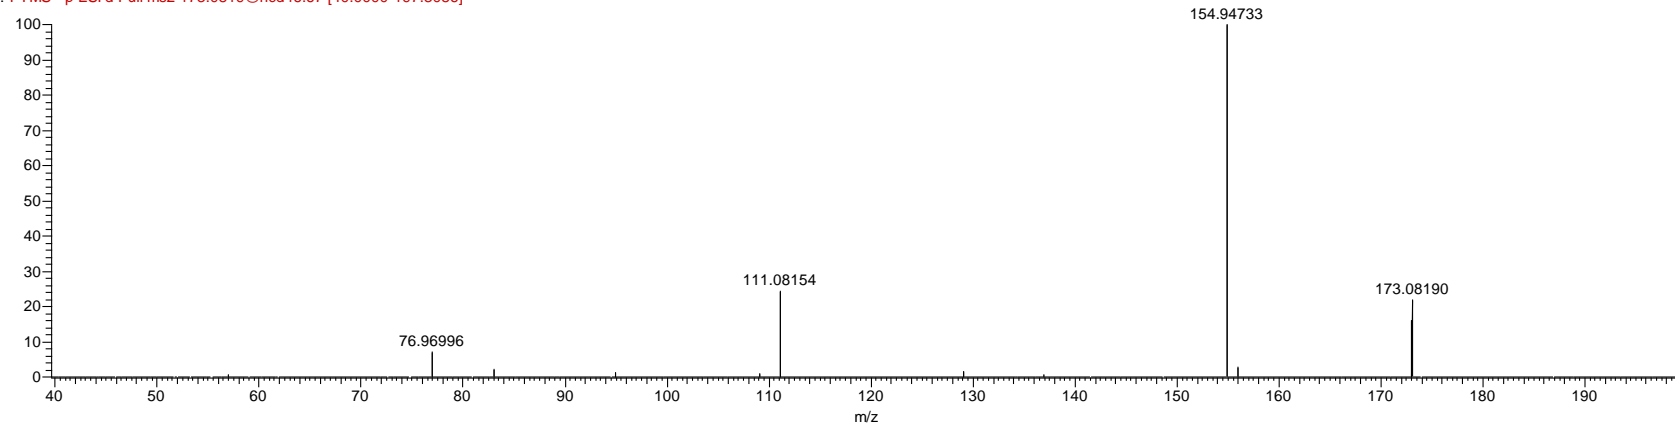

# 12,13-Dihydroxy-9-octadecenoic acid

vaso\_FSddMS2\_245\_455\_neg\_01  
30mg/1ml 70/30 met/acqua

03/15/22 12:45:25

RT: 0.00 - 23.00 SM: 15G

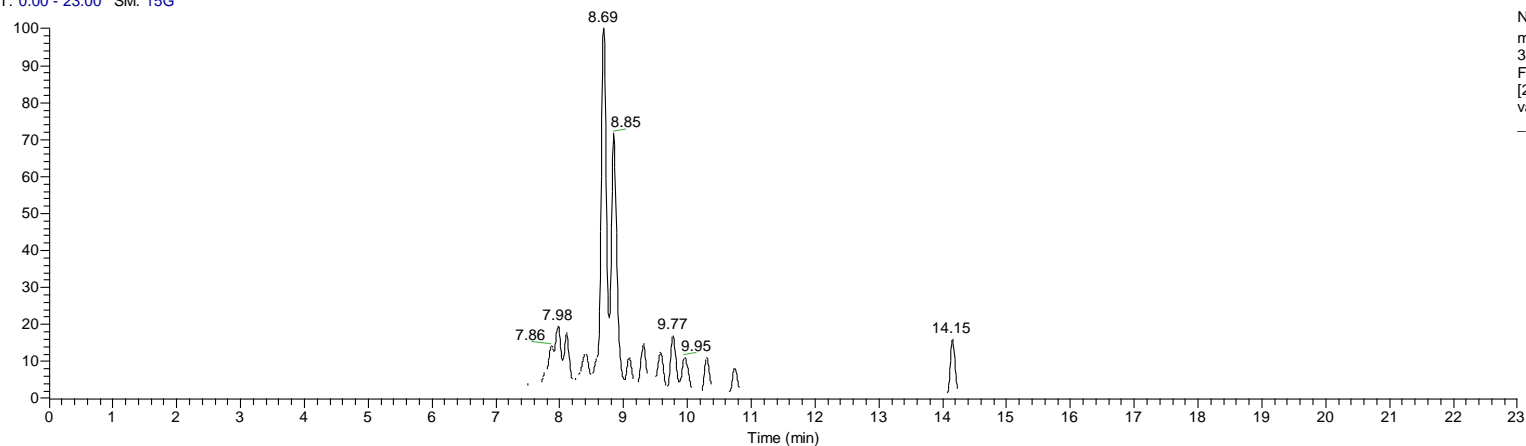

NL: 1.40E6  
m/z=  
313.23527-313.24153 F:  
FTMS - p ESI Full ms  
[245.0000-455.0000] MS  
vaso\_FSddMS2\_245\_455  
\_neg\_01

vaso\_FSddMS2\_245\_455\_neg\_01 #3629-3709 RT: 8.69-8.74 AV: 2 NL: 3.49E5  
F: FTMS - p ESI d Full ms2 313.2384@hcd46.67 [50.0000-340.2681]

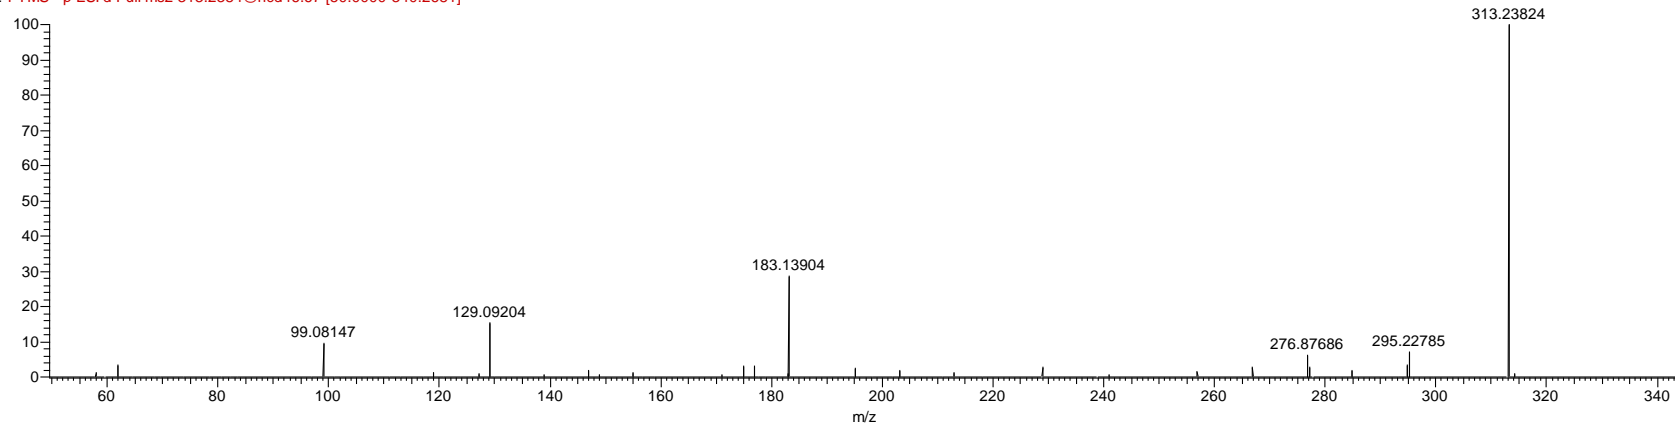

# 9-Hydroxy-octadecadienoic acid

vaso\_FSddMS2\_245\_455\_01  
30mg/1ml 70/30 met/acqua

03/14/22 17:06:52

RT: 0.00 - 23.00 SM: 15G

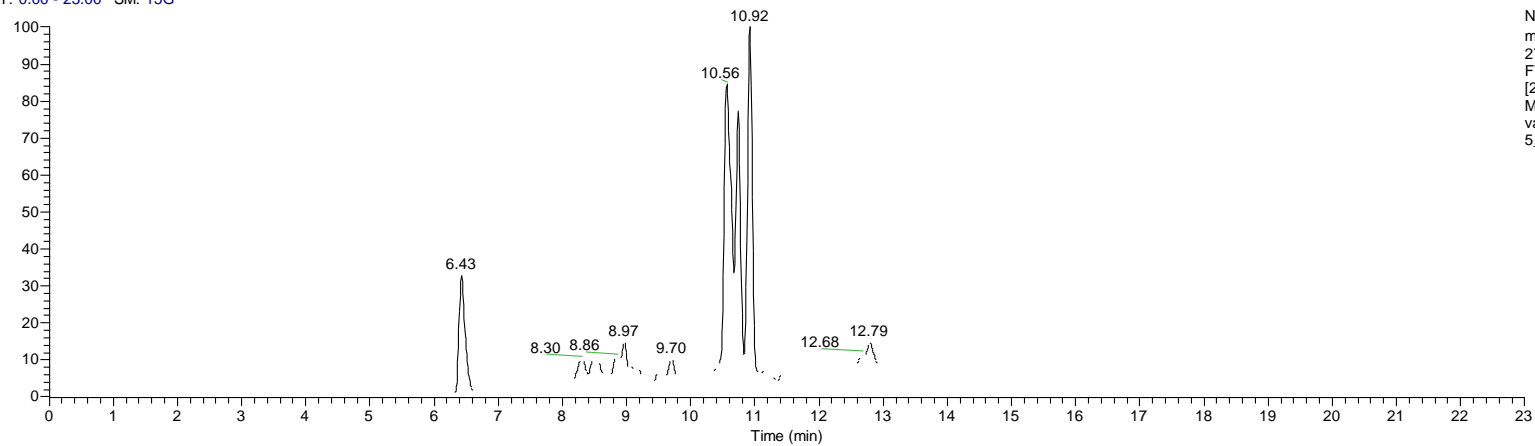

NL: 1.06E6  
m/z=  
277.21046-277.22154 F:  
FTMS + p ESI Full ms  
[245.0000-455.0000]  
MS  
vaso\_FSddMS2\_245\_45  
5\_01

vaso\_FSddMS2\_245\_455\_01 #4302-4431 RT: 10.61-10.87 AV: 8 NL: 2.99E4  
F: FTMS + p ESI d Full ms2 277.1281@hcd46.67 [50.0000-303.4357]

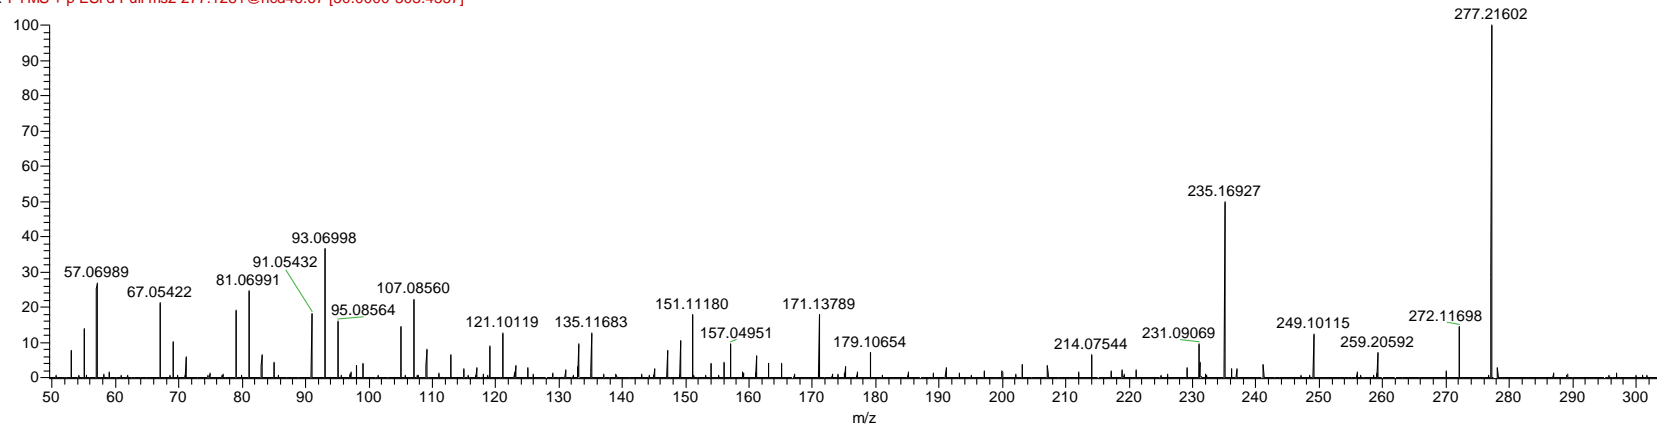

# O-Arachidonoyl ethanolamine

vaso\_FSddMS2\_245\_455\_01  
30mg/1ml 70/30 met/acqua

03/14/22 17:06:52

RT: 0.00 - 23.00 SM: 15G

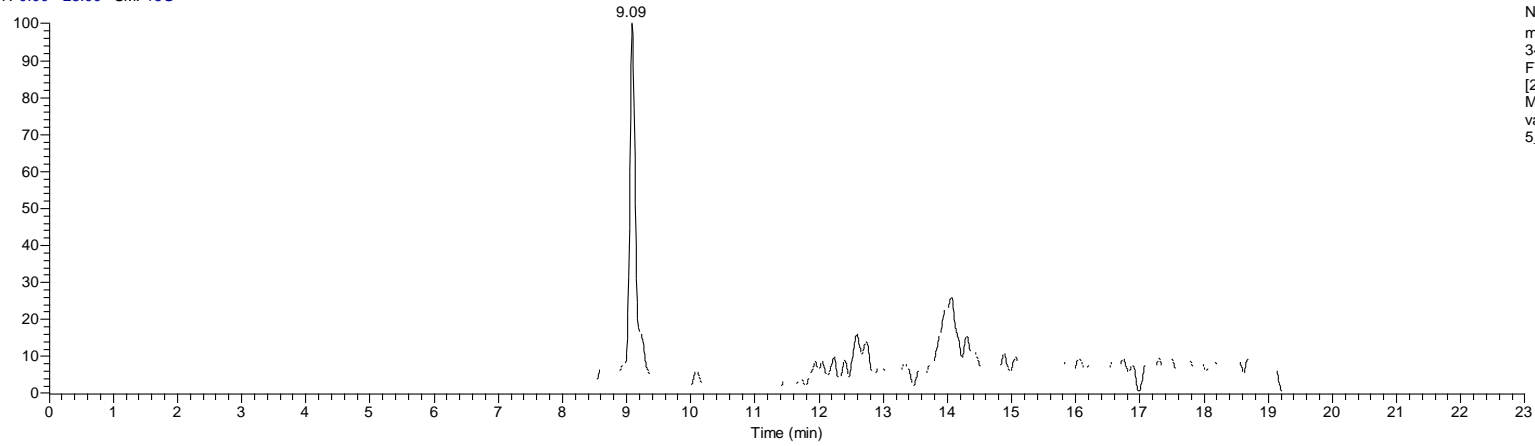

NL: 1.34E5  
m/z=  
348.28552-348.29248 F:  
FTMS + p ESI Full ms  
[245.0000-455.0000]  
MS  
vaso\_FSddMS2\_245\_45  
5\_01

vaso\_FSddMS2\_245\_455\_01 #3592-3740 RT: 9.09-9.13 AV: 2 SB: 6 5.55-8.24 , 1.27-3.73 NL: 7.97E4  
F: FTMS + p ESI d Full ms2 348.2743@hcd46.67 [50.0000-376.0048]

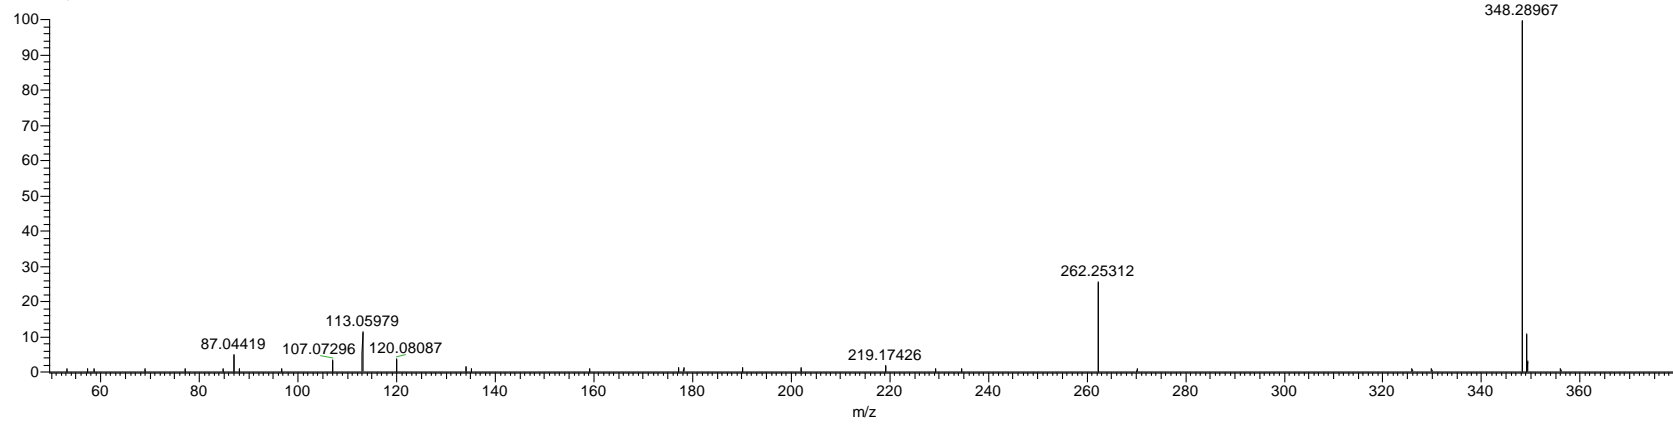

# 12-oxo Phytodienoic Acid

vaso\_FSddMS2\_245\_455\_01  
30mg/1ml 70/30 met/acqua

03/14/22 17:06:52

RT: 0.00 - 23.00 SM: 15G

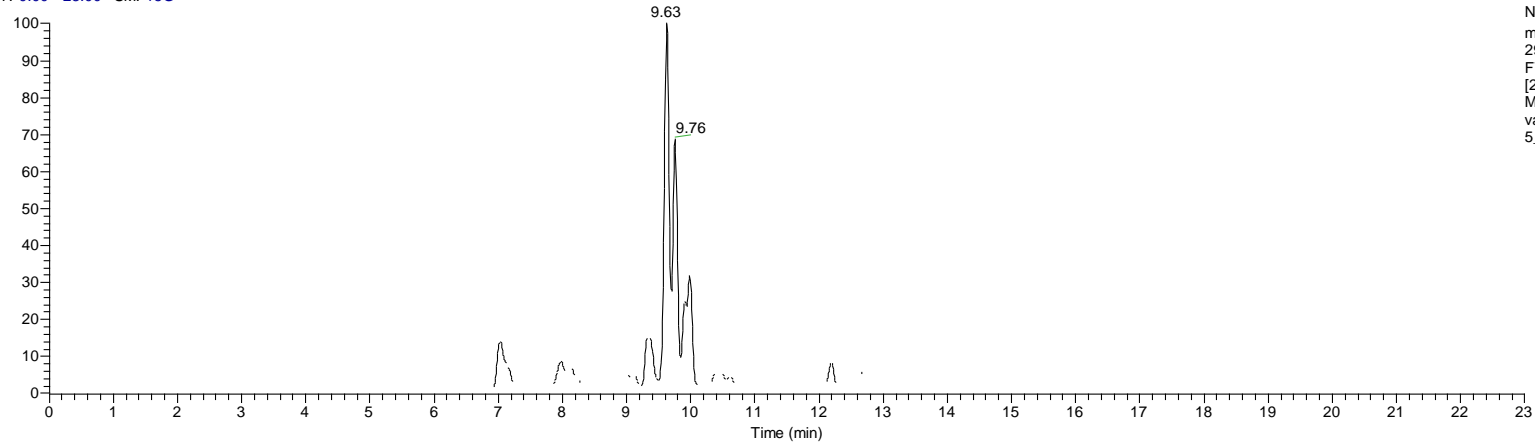

NL: 1.81E6  
m/z=  
293.21071-293.21129 F:  
FTMS + p ESI Full ms  
[245.0000-455.0000]  
MS  
vaso\_FSddMS2\_245\_45  
5\_01

vaso\_FSddMS2\_245\_455\_01 #3832-4045 RT: 9.49-9.96 AV: 10 SB: 20 5.55-8.24 , 1.27-3.73 NL: 2.66E5  
F: FTMS + p ESI d Full ms2 293.2109@hcd46.67 [50.0000-319.8402]

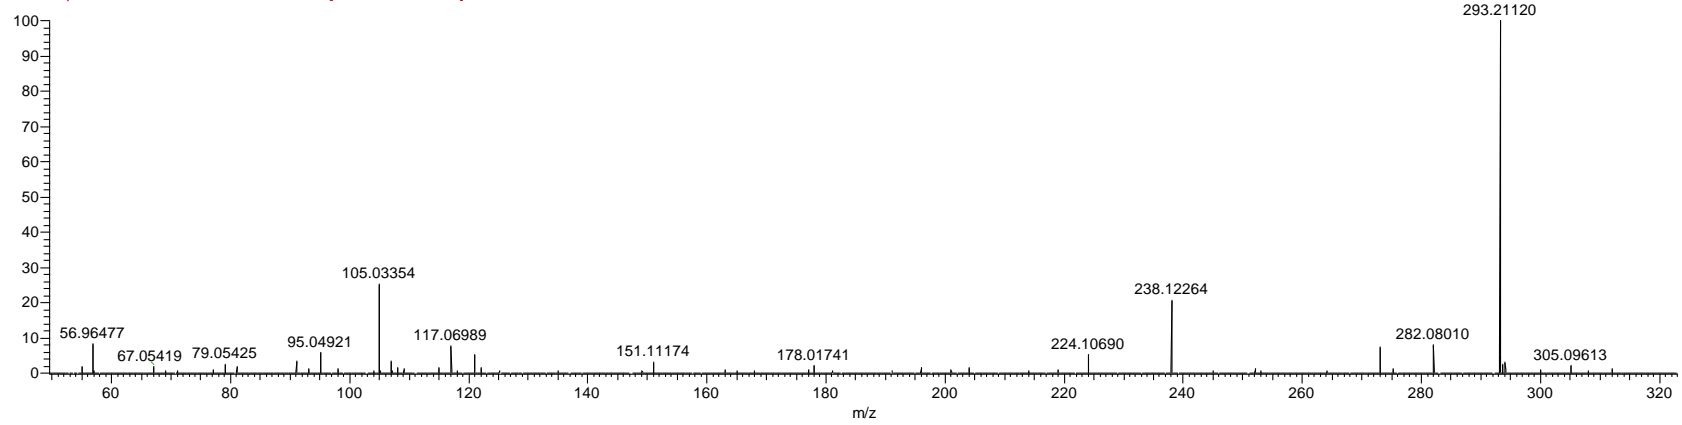

# Uric acid

vaso\_FSddMS2\_150\_255\_neg\_01  
30mg/1ml 70/30 met/acqua

03/15/22 12:21:25

RT: 0.00 - 23.00 SM: 15G

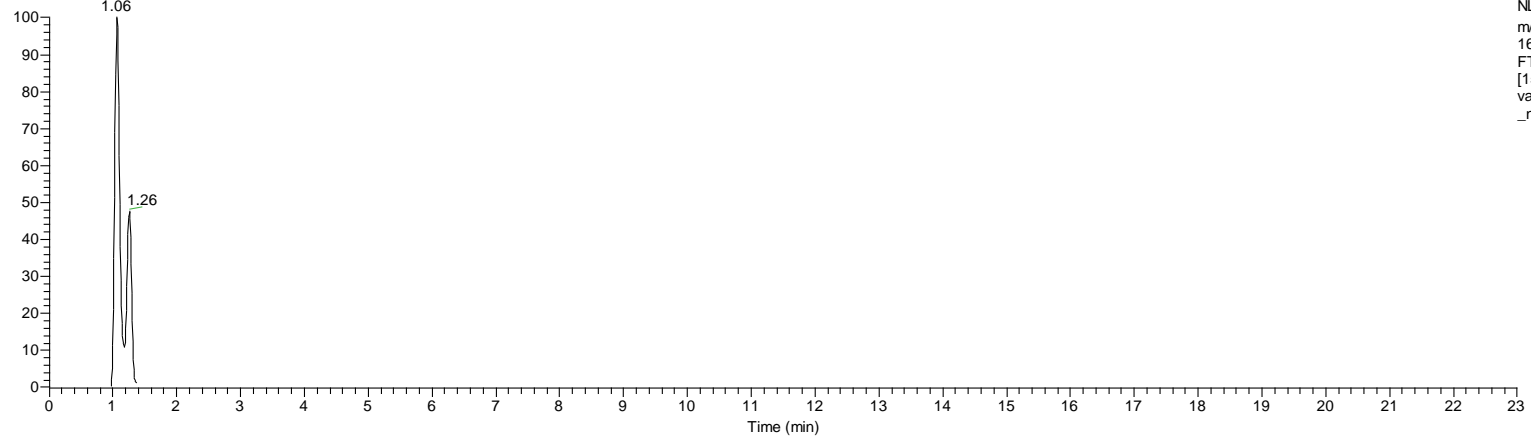

NL: 1.27E7  
m/z=  
167.01945-167.02279 F:  
FTMS - p ESI Full ms  
[150.0000-255.0000] MS  
vaso\_FSddMS2\_150\_255  
\_neg\_01

vaso\_FSddMS2\_150\_255\_neg\_01 #304-427 RT: 0.92-1.14 AV: 6 NL: 9.38E5  
F: FTMS - p ESI d Full ms2 167.0327@hcd46.67 [40.0000-191.1383]

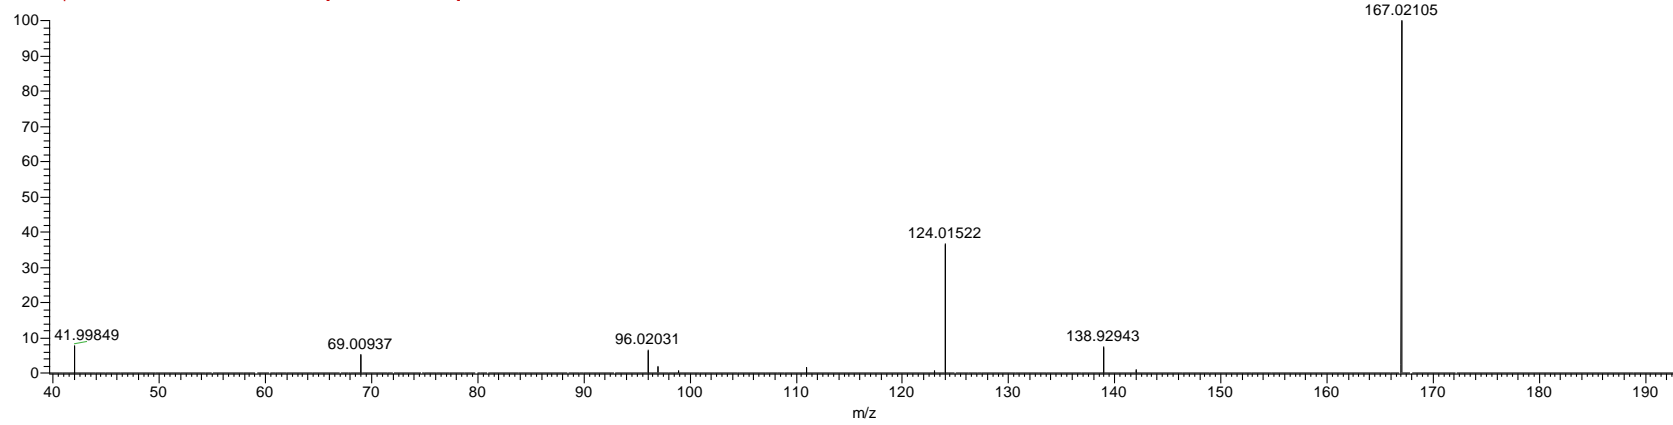



# 6-methoxyquinoline

vaso\_FSddMS2\_150\_255\_01  
30mg/1ml 70/30 met/acqua

03/14/22 16:42:48

RT: 0.00 - 23.01 SM: 15G

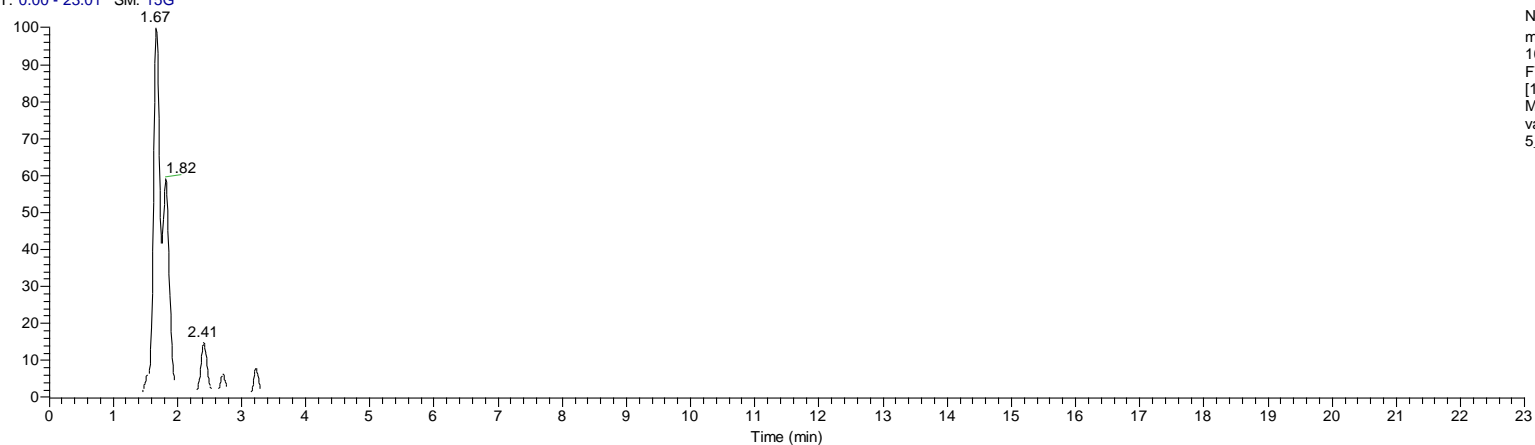

NL: 9.47E5  
m/z=  
160.07340-160.07660 F:  
FTMS + p ESI Full ms  
[150.0000-255.0000]  
MS  
vaso\_FSddMS2\_150\_25  
5\_01

vaso\_FSddMS2\_150\_255\_01 #658-819 RT: 1.62-1.89 AV: 7 SB: 2 2.79-4.24 , 6.15-13.03 NL: 1.32E5  
F: FTMS + p ESI d Full ms2 160.0682@hcd46.67 [40.0000-184.0346]

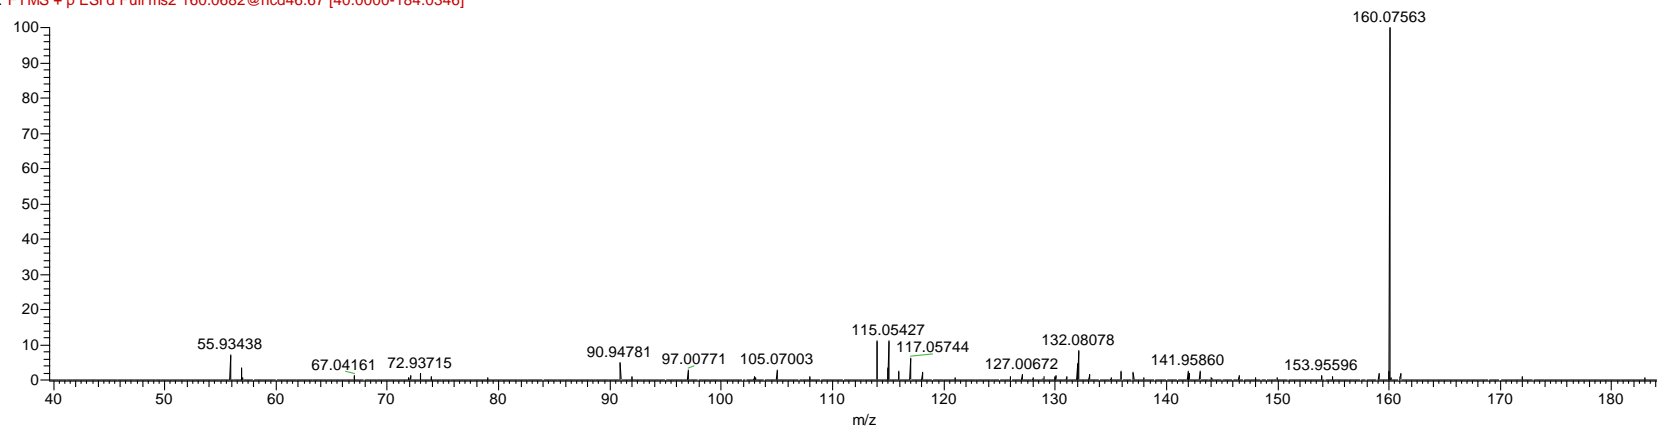

# Xanthine

vaso\_FSddMS2\_150\_255\_neg\_01  
30mg/1ml 70/30 met/acqua

03/15/22 12:21:25

RT: 0.00 - 23.00 SM: 15G

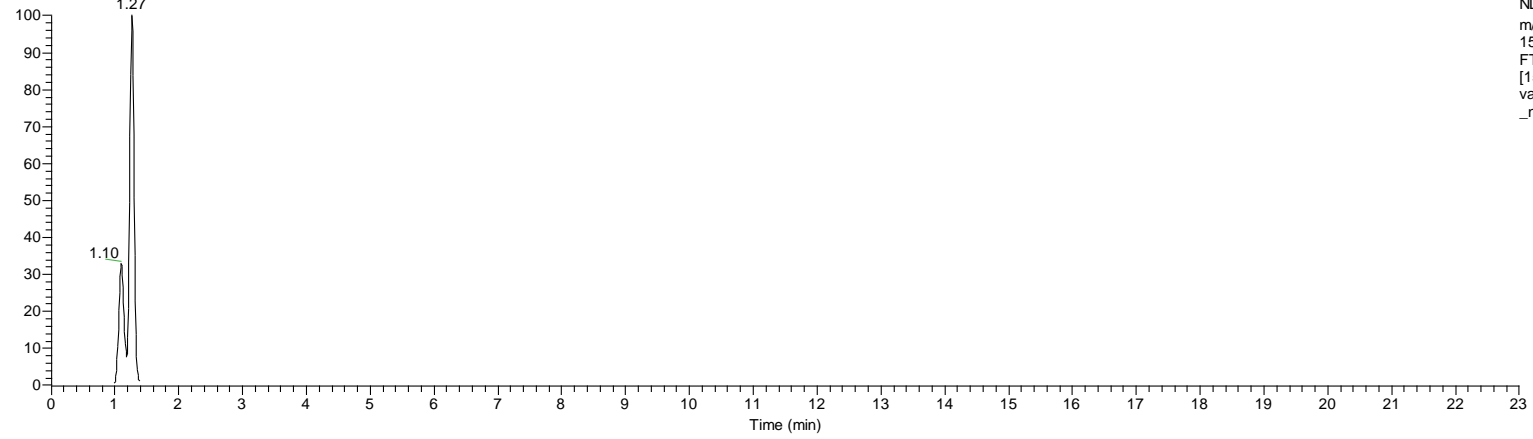

NL: 8.87E5  
m/z=  
151.02449-151.02751 F:  
FTMS - p ESI Full ms  
[150.0000-255.0000] MS  
vaso\_FSddMS2\_150\_255  
\_neg\_01

vaso\_FSddMS2\_150\_255\_neg\_01 #460 RT: 1.26 AV: 1 SB: 2 1.14-2.19 , 0.22-0.71 NL: 2.18E5  
F: FTMS - p ESI d Full ms2 150.9829@hcd46.67 [40.0000-174.7675]

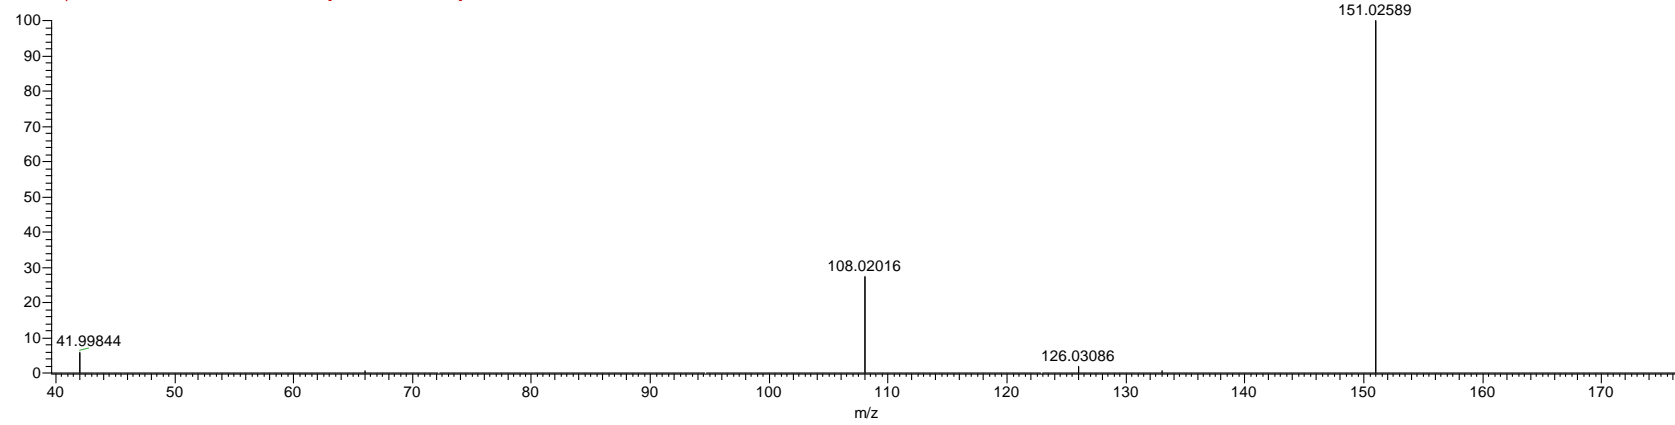

# Caffeine

vaso\_FSddMS2\_150\_255\_01  
30mg/1ml 70/30 met/acqua

03/14/22 16:42:48

RT: 0.00 - 23.01 SM: 11G

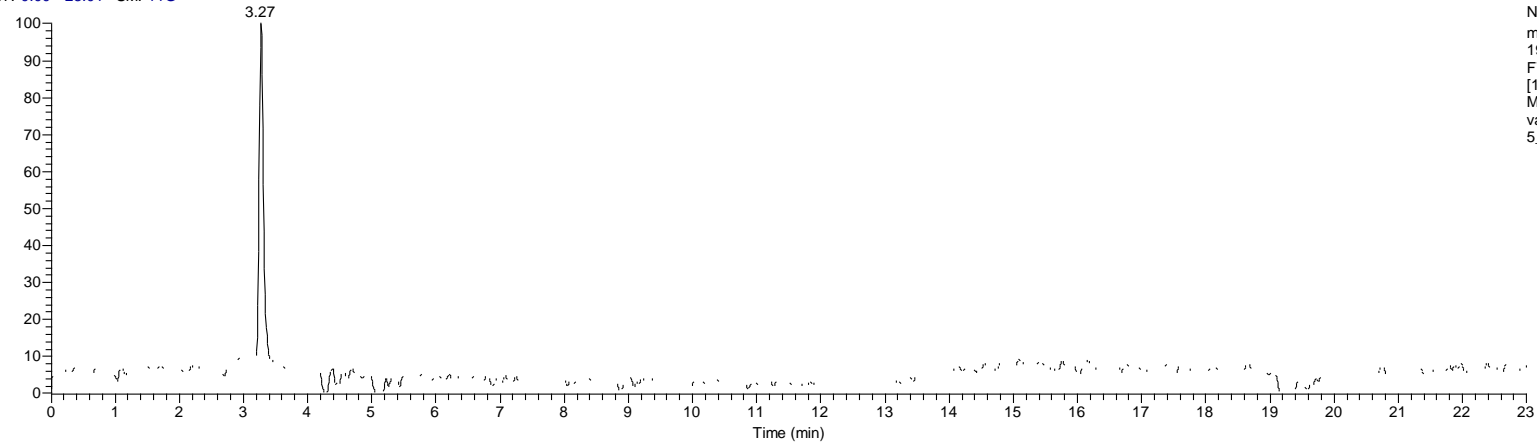

NL: 1.84E5  
m/z=  
195.08505-195.08895 F:  
FTMS + p ESI Full ms  
[150.0000-255.0000]  
MS  
vaso\_FSddMS2\_150\_25  
5\_01

vaso\_FSddMS2\_150\_255\_01 #1330 RT: 3.27 AV: 1 SB: 44 9.46-13.43 , 8.65-9.13 NL: 9.57E4  
F: FTMS + p ESI d Full ms2 194.9435@hcd46.67 [43.9215-219.6074]

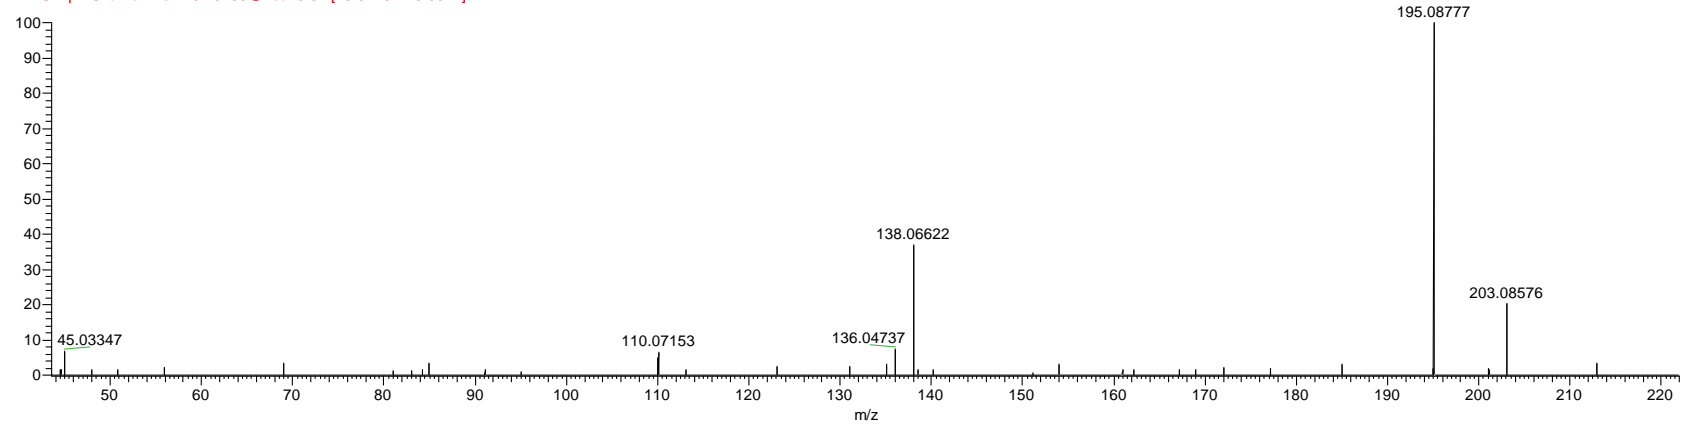

# Fraxetin

vaso\_FSddMS2\_150\_255\_neg\_01  
30mg/1ml 70/30 met/acqua

03/15/22 12:21:25

RT: 0.00 - 23.00 SM: 15G

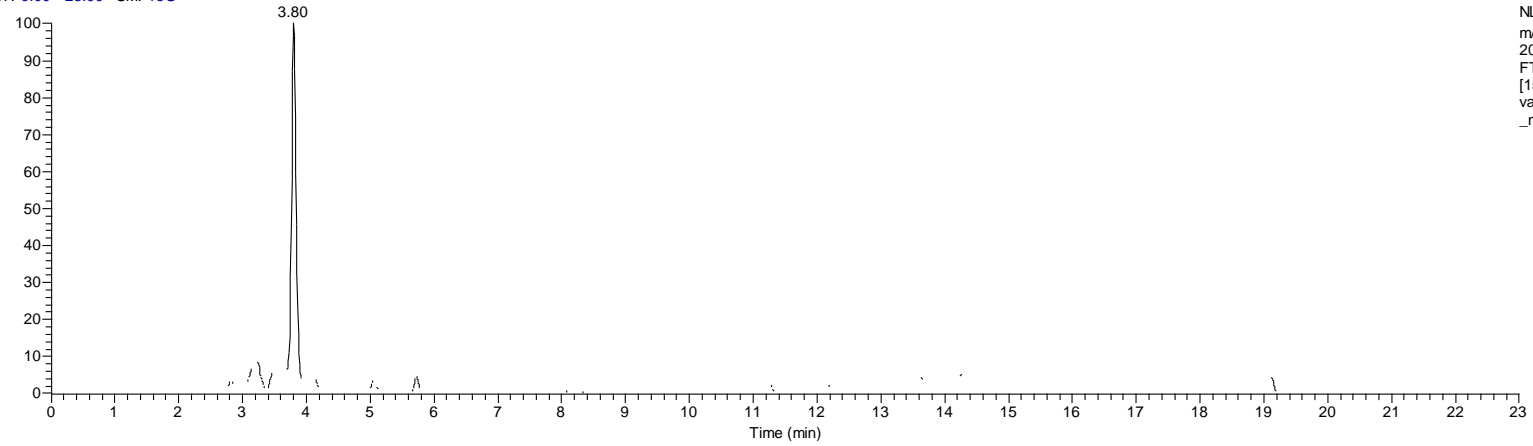

NL: 1.71E5  
m/z=  
207.02796-207.03004 F:  
FTMS - p ESI Full ms  
[150.0000-255.0000] MS  
vaso\_FSddMS2\_150\_255  
\_neg\_01

vaso\_FSddMS2\_150\_255\_neg\_01 #1456 RT: 3.80 AV: 1 SB: 4 5.84-7.14 , 0.26-4.50 NL: 5.26E4  
F: FTMS - p ESI d Full ms2 206.9887@hcd46.67 [46.3787-231.8934]

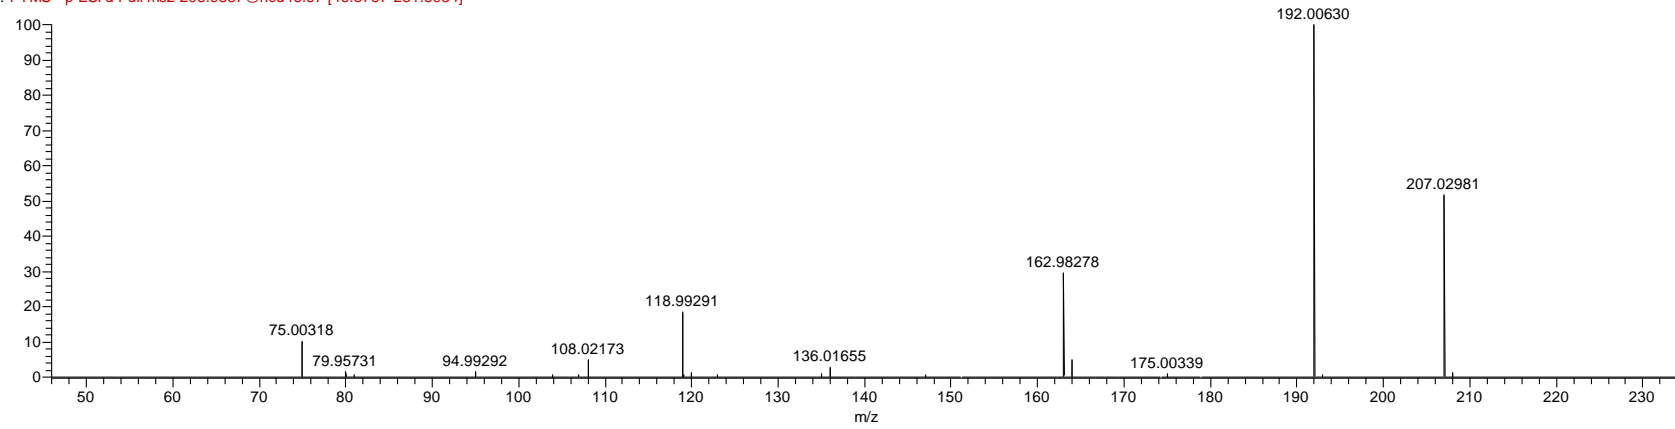

# N1-[4-(1,3-Oxazol-5-yl)phenyl]cyclopropane-1-carboxamide

vaso\_FSddMS2\_150\_255\_01  
30mg/1ml 70/30 met/acqua

03/14/22 16:42:48

RT: 0.00 - 23.01 SM: 3G

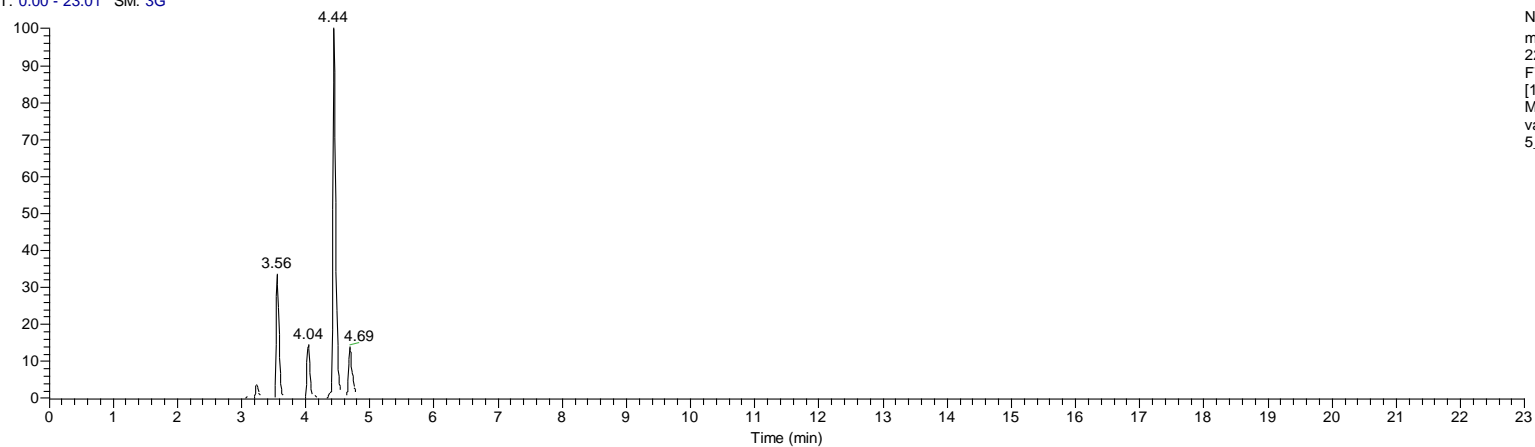

NL: 4.30E6  
m/z=  
229.09471-229.09929 F:  
FTMS + p ESI Full ms  
[150.0000-255.0000]  
MS  
vaso\_FSddMS2\_150\_25  
5\_01

vaso\_FSddMS2\_150\_255\_01 #1735 RT: 4.03 AV: 1 NL: 2.05E5  
F: FTMS + p ESI d Full ms2 229.0682@hcd46.67 [50.0000-254.4146]

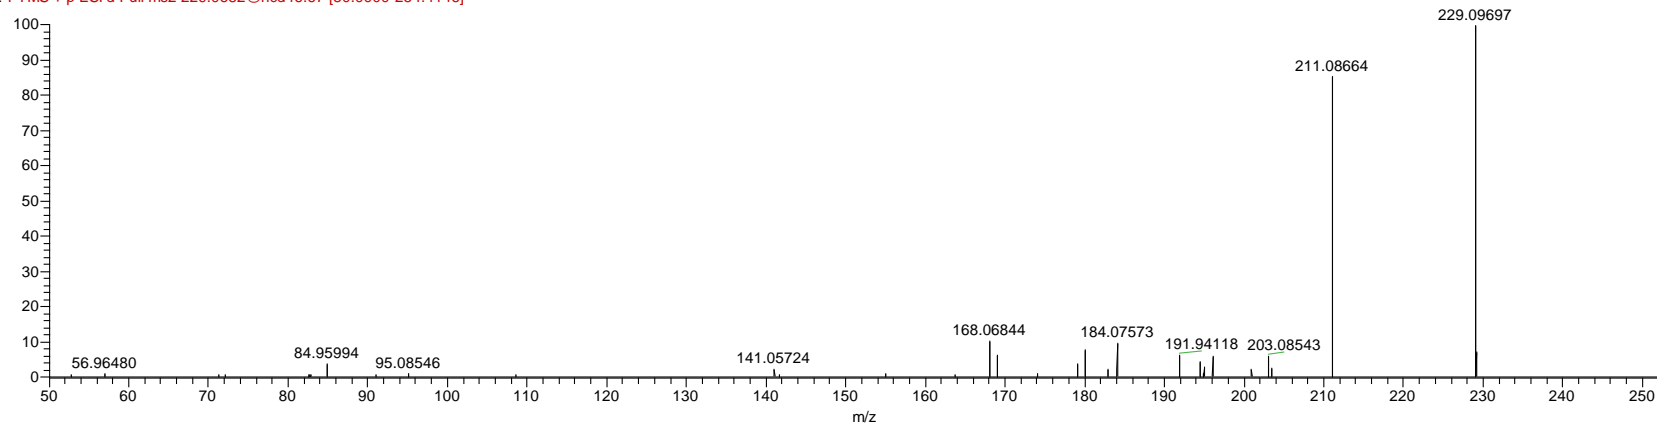

# N-Benzoyl-L-phenylalaninol

vaso\_FSddMS2\_245\_455\_01  
30mg/1ml 70/30 met/acqua

03/14/22 17:06:52

RT: 0.00 - 23.00 SM: 3G

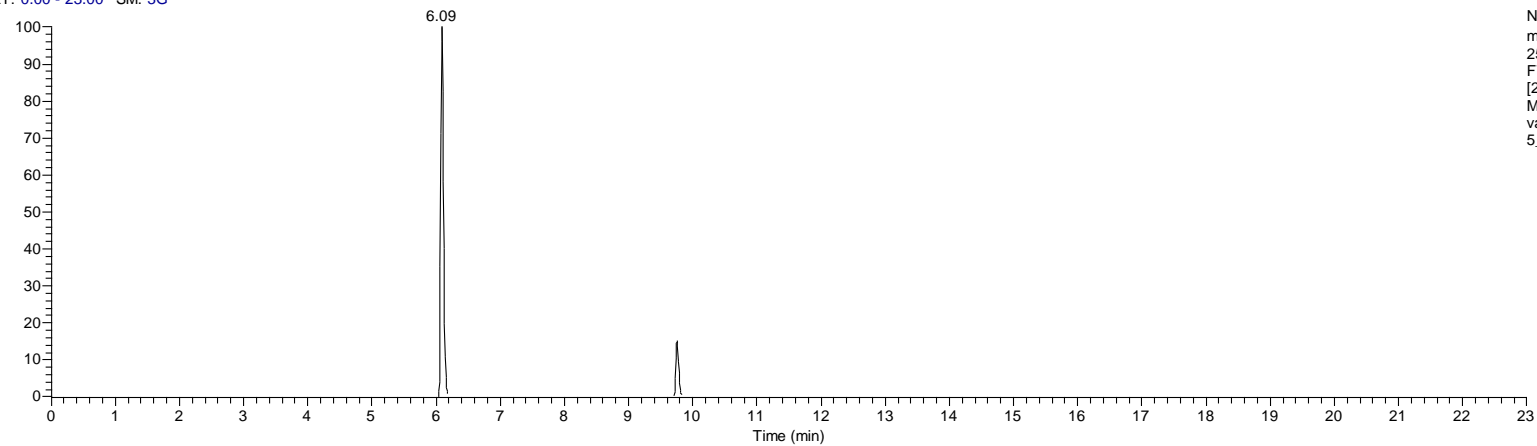

NL: 6.75E6  
m/z=  
256.13044-256.13556 F:  
FTMS + p ESI Full ms  
[245.0000-455.0000]  
MS  
vaso\_FSddMS2\_245\_45  
5\_01

vaso\_FSddMS2\_245\_455\_01 #2377-2461 RT: 5.99-6.15 AV: 6 SB: 8 6.34-6.81 , 5.39-5.82 NL: 9.61E5  
F: FTMS + p ESI d Full ms2 256.1333@hcd46.67 [50.0000-282.0209]

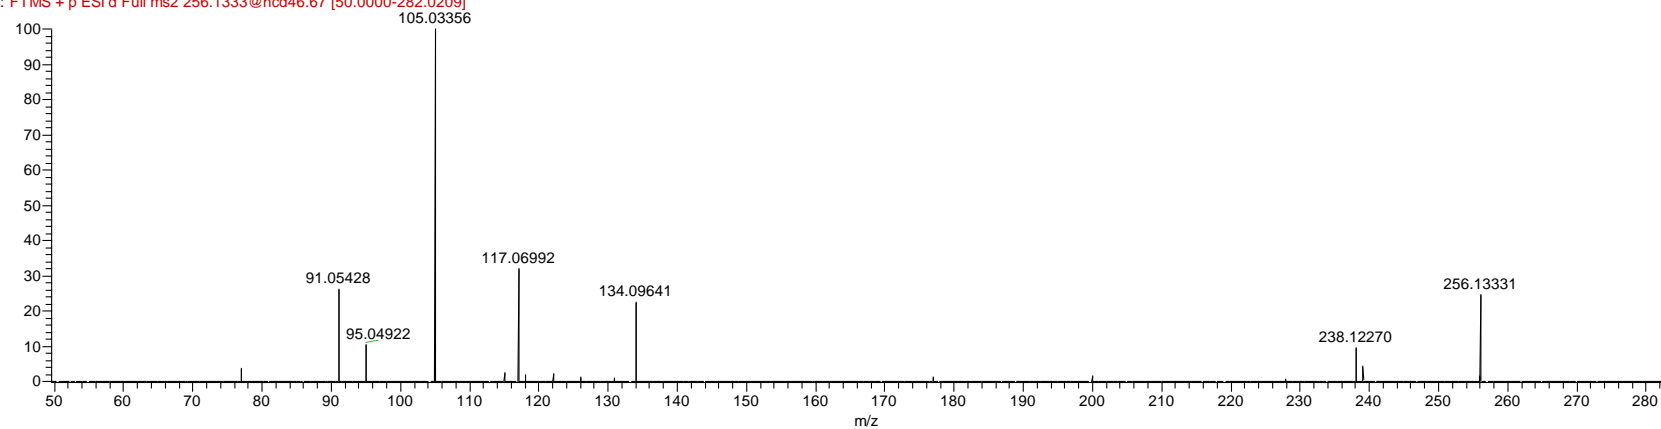

# Arginine

vaso\_FSddMS2\_150\_255\_01  
30mg/1ml 70/30 met/acqua

03/14/22 16:42:48

RT: 0.00 - 23.01 SM: 3G

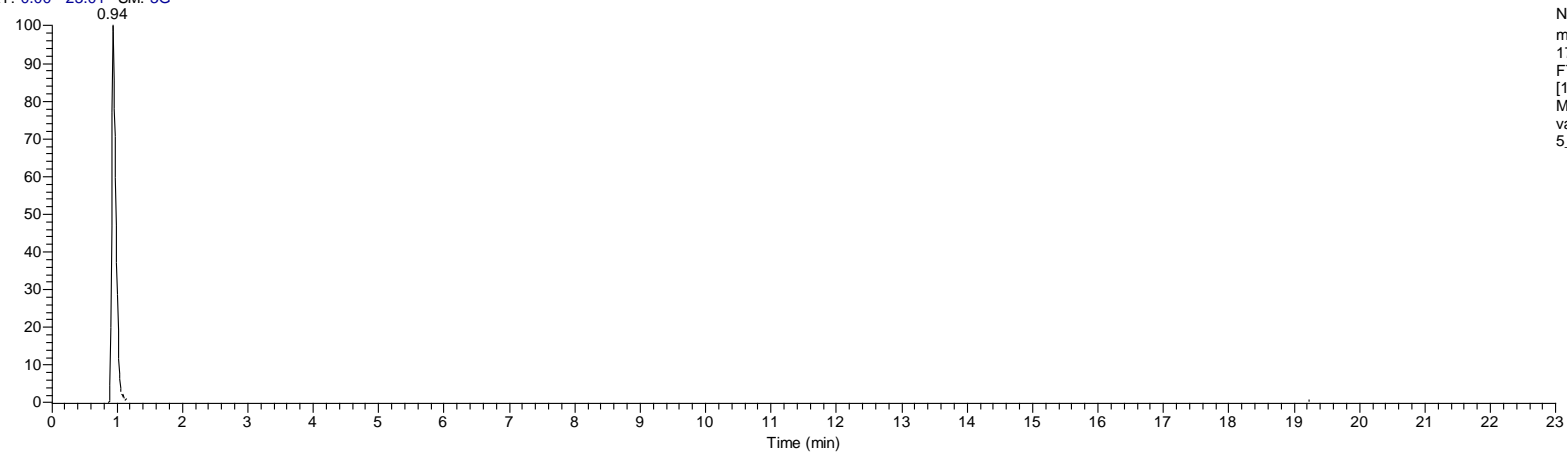

NL: 2.42E6  
m/z=  
175.11724-175.12074 F:  
FTMS + p ESI Full ms  
[150.0000-255.0000]  
MS  
vaso\_FSddMS2\_150\_25  
5\_01

vaso\_FSddMS2\_150\_255\_01 #390 RT: 0.92 AV: 1 NL: 2.40E5  
F: FTMS + p ESI d Full ms2 174.9381@hcd46.67 [40.0000-199.2018]

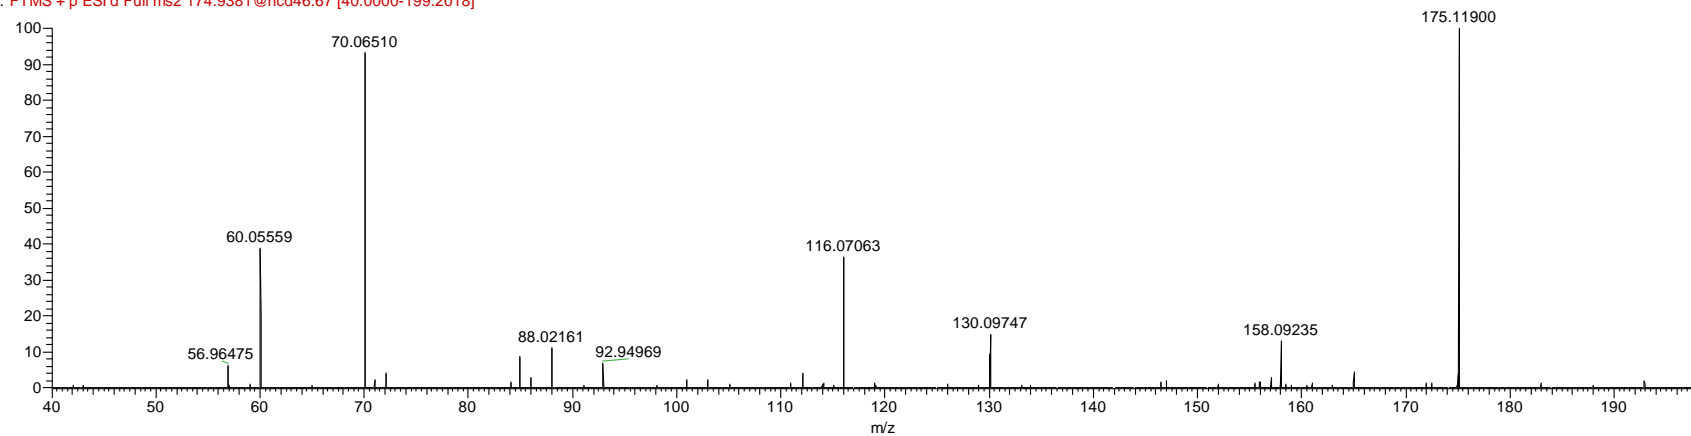

# Tryptophan

vaso\_FSddMS2\_150\_255\_01  
30mg/1ml 70/30 met/acqua

03/14/22 16:42:48

RT: 0.00 - 23.01 SM: 3G

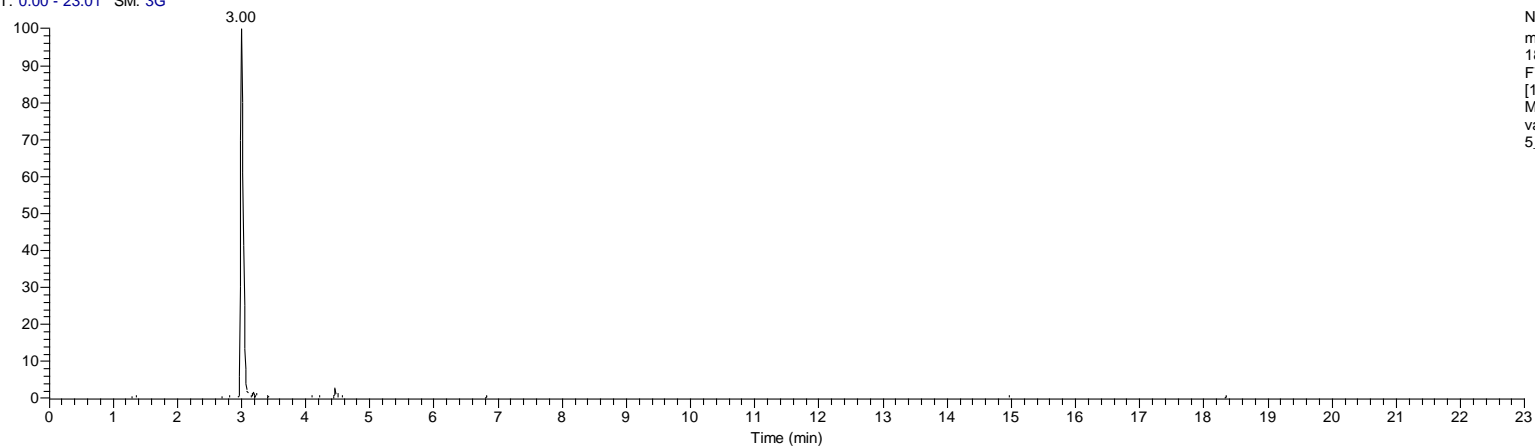

NL: 1.65E6  
m/z=  
188.06872-188.07248 F:  
FTMS + p ESI Full ms  
[150.0000-255.0000]  
MS  
vaso\_FSddMS2\_150\_25  
5\_01

vaso\_FSddMS2\_150\_255\_01 #1286 RT: 2.99 AV: 1 SB: 2 2.33-3.08 NL: 8.77E4  
F: FTMS + p ESI d Full ms2 188.0706@hcd46.67 [42.5194-212.5971]

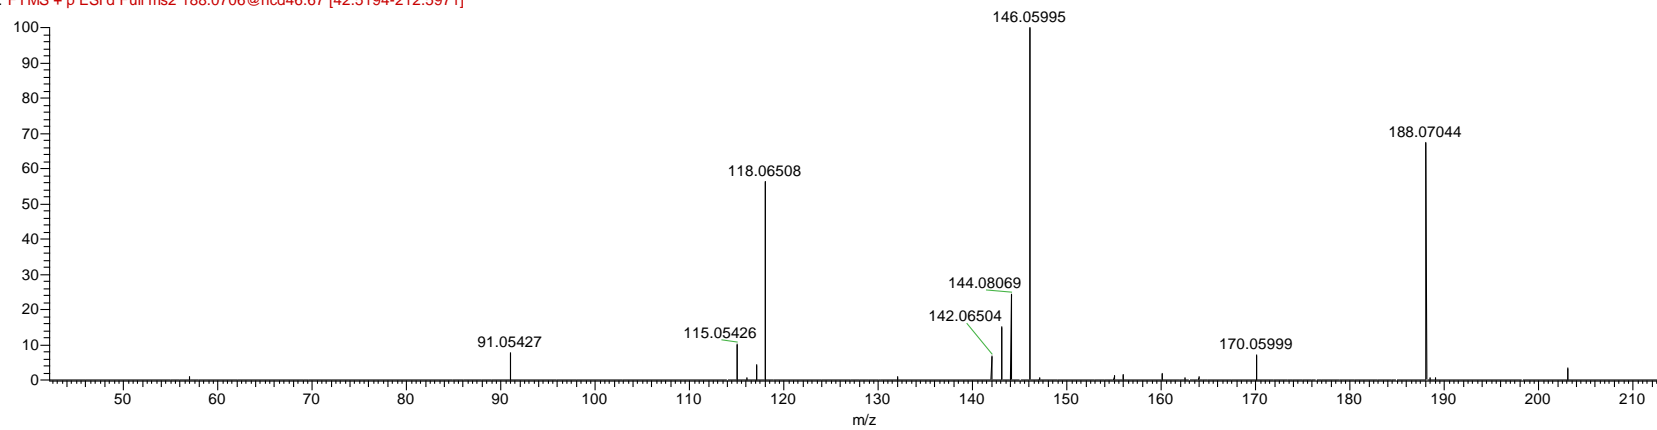



# Phenylalanine

vaso\_FSddMS2\_150\_255\_01  
30mg/1ml 70/30 met/acqua

03/14/22 16:42:48

RT: 0.00 - 23.01 SM: 3G

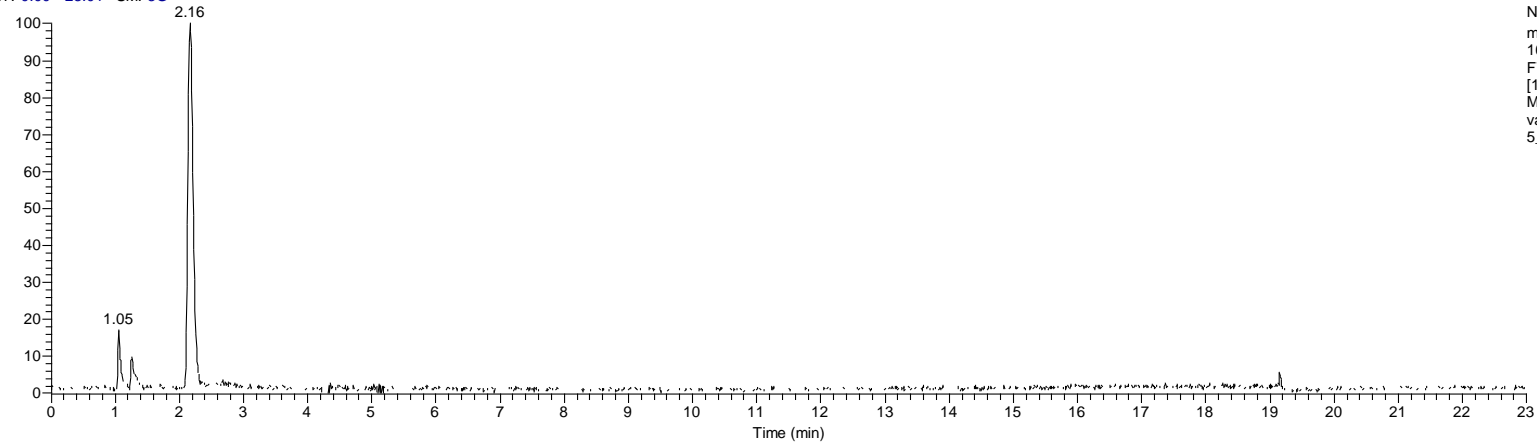

NL: 1.45E6  
m/z=  
166.08434-166.08766 F:  
FTMS + p ESI Full ms  
[150.0000-255.0000]  
MS  
vaso\_FSddMS2\_150\_25  
5\_01

vaso\_FSddMS2\_150\_255\_01 #892-957 RT: 2.12-2.21 AV: 3 NL: 7.49E5  
F: FTMS + p ESI d Full ms2 166.1227@hcd46.67 [40.0000-190.2102]

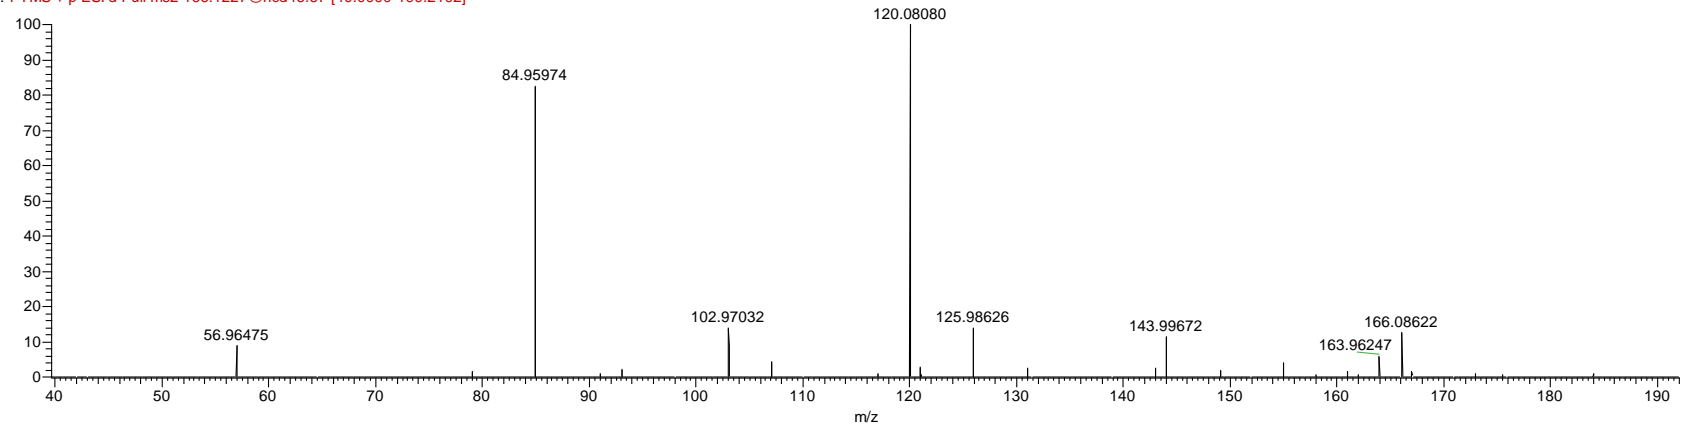

# Carnitine

vaso\_FSddMS2\_150\_255\_01  
30mg/1ml 70/30 met/acqua

03/14/22 16:42:48

RT: 0.00 - 23.01 SM: 15G

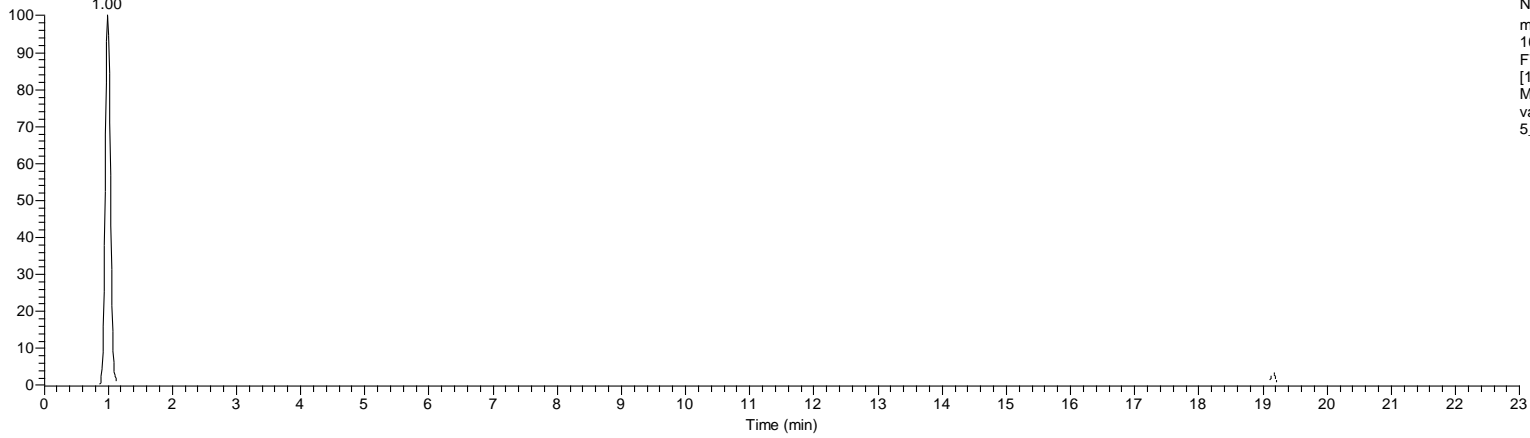

NL: 1.71E6  
m/z=  
162.11038-162.11362 F:  
FTMS + p ESI Full ms  
[150.0000-255.0000]  
MS  
vaso\_FSddMS2\_150\_25  
5\_01

vaso\_FSddMS2\_150\_255\_01 #414-433 RT: 1.00-1.01 AV: 2 NL: 7.60E5  
F: FTMS + p ESI d Full ms2 162.0762@hcd46.67 [40.0000-186.0827]

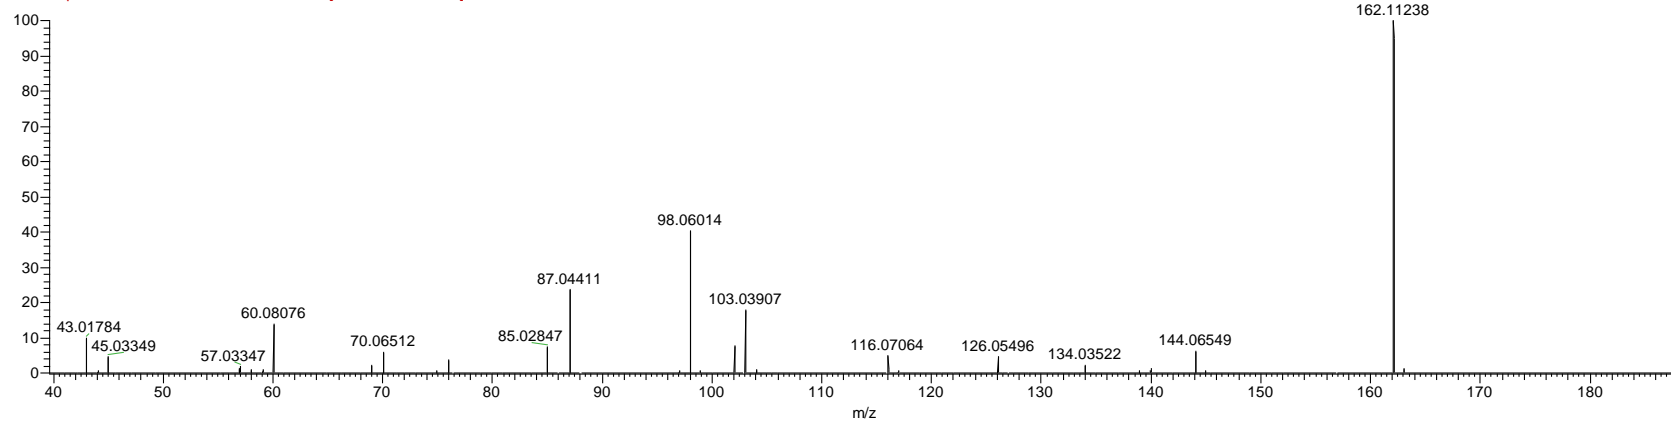

# N-Acetyl-glutamic acid

vaso\_FSddMS2\_150\_255\_neg\_01  
30mg/1ml 70/30 met/acqua

03/15/22 12:21:25

RT: 0.00 - 23.00 SM: 15G

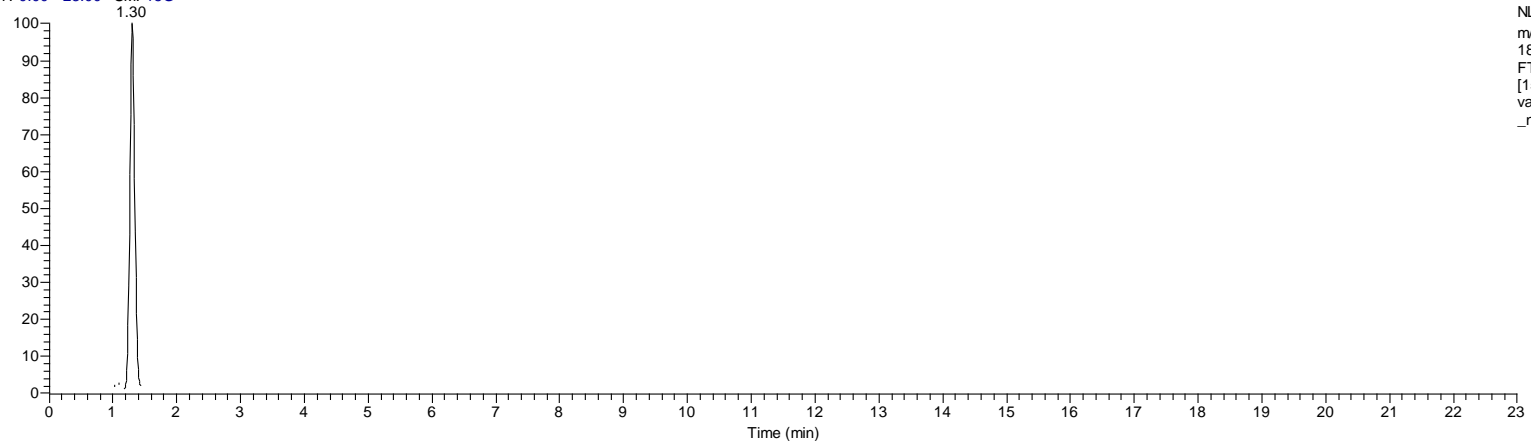

NL: 7.82E5  
m/z=  
188.05412-188.05788 F:  
FTMS - p ESI Full ms  
[150.0000-255.0000] MS  
vaso\_FSddMS2\_150\_255  
\_neg\_01

vaso\_FSddMS2\_150\_255\_neg\_01 #475 RT: 1.28 AV: 1 SB: 3 1.14-2.19 , 0.22-0.71 NL: 4.88E4  
F: FTMS - p ESI d Full ms2 188.0565@hcd46.67 [42.5165-212.5826]

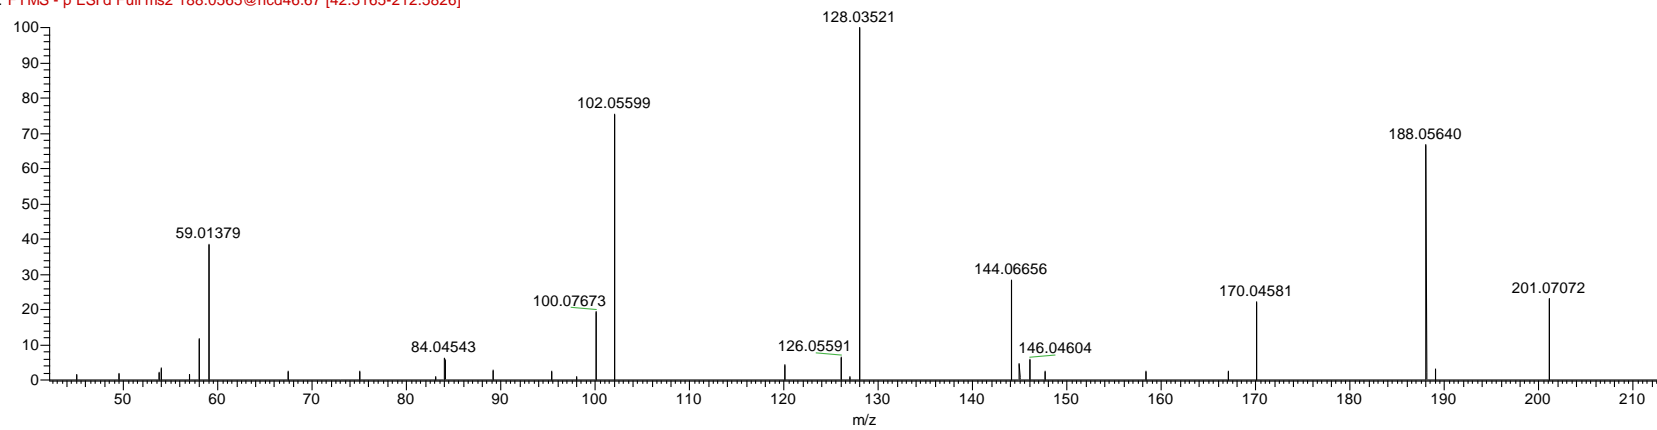

# Tyrosine

vaso\_FSddMS2\_150\_255\_01  
30mg/1ml 70/30 met/acqua

03/14/22 16:42:48

RT: 0.00 - 23.01 SM: 15G

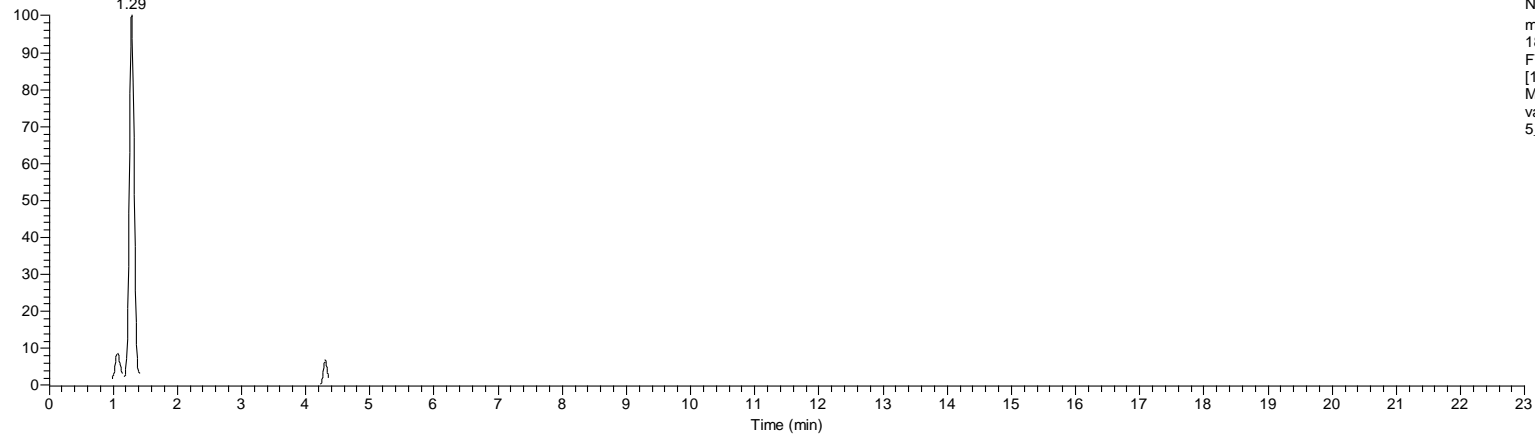

NL: 6.54E5  
m/z=  
182.08038-182.08402 F:  
FTMS + p ESI Full ms  
[150.0000-255.0000]  
MS  
vaso\_FSddMS2\_150\_25  
5\_01

vaso\_FSddMS2\_150\_255\_01 #521-615 RT: 1.28-1.32 AV: 2 SB: 130 2.79-4.24 , 2.47-19.20 NL: 1.71E5  
F: FTMS + p ESI d Full ms2 182.0812@hcd46.67 [41.2976-206.4879]

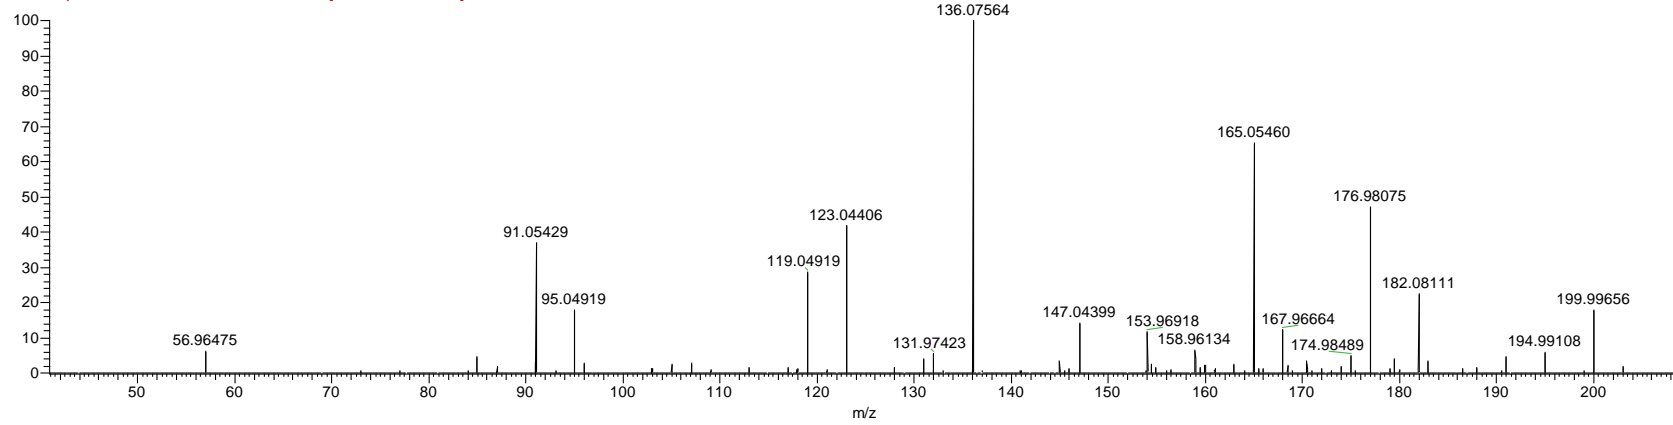

# Histidine

vaso\_FSddMS2\_150\_255\_01  
30mg/1ml 70/30 met/acqua

03/14/22 16:42:48

RT: 0.00 - 23.01 SM: 15G

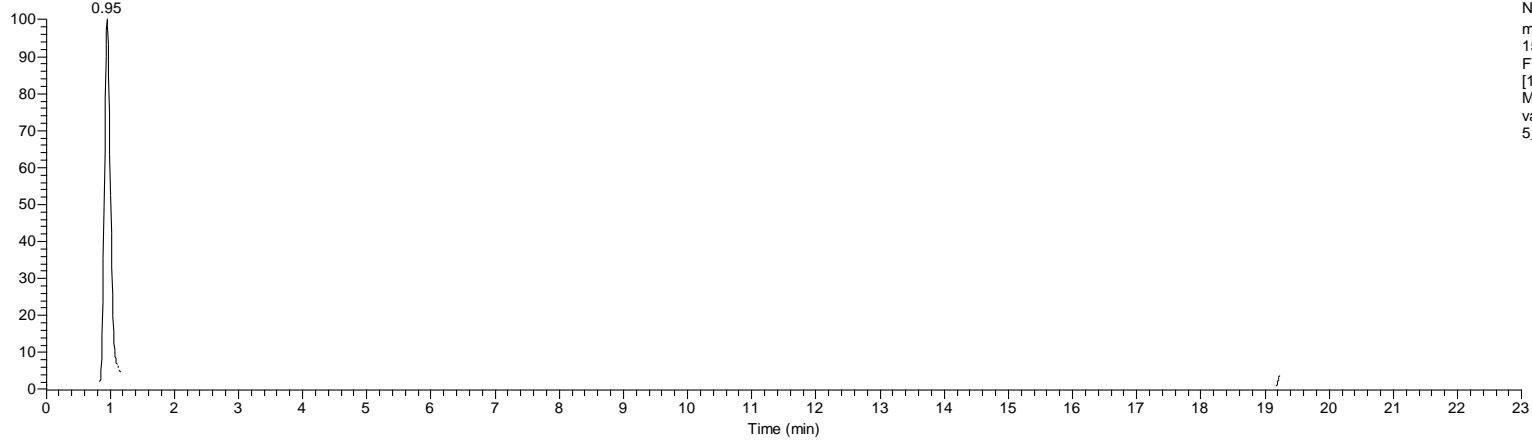

NL: 5.19E5  
m/z=  
156.07644-156.07956 F:  
FTMS + p ESI Full ms  
[150.0000-255.0000]  
MS  
vaso\_FSddMS2\_150\_25  
5\_01

vaso\_FSddMS2\_150\_255\_01 #390 RT: 0.92 AV: 1 SB: 8 1.25-15.92 , 0.00-0.42 NL: 2.51E5  
F: FTMS + p ESI d Full ms2 156.1384@hcd46.67 [40.0000-180.0262]

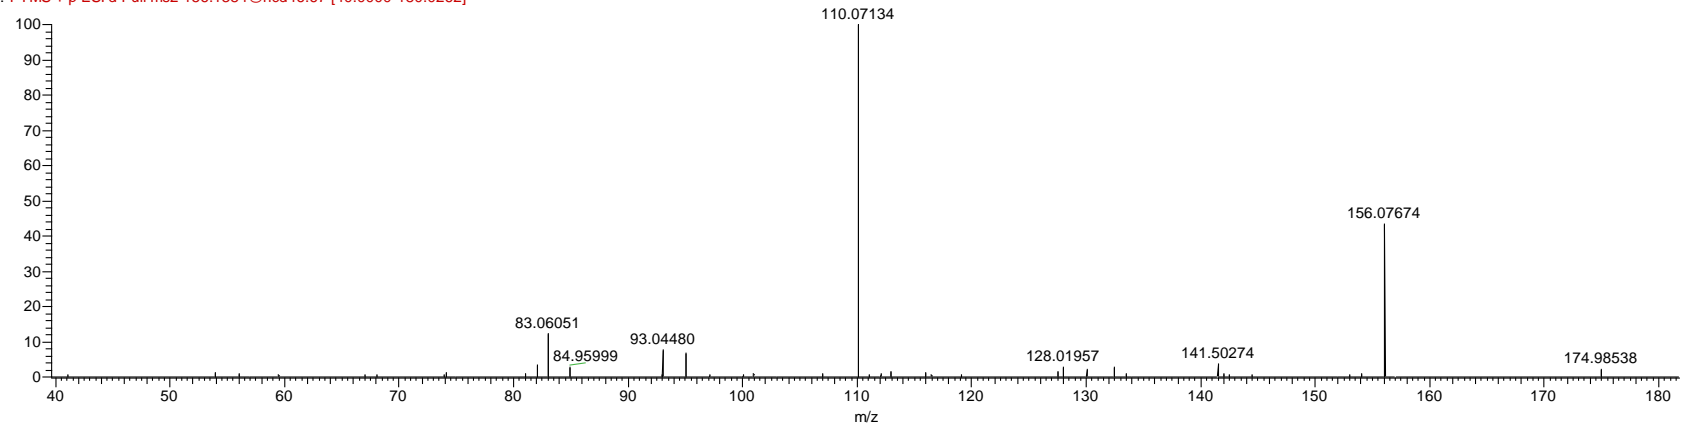

# Citric acid

vaso\_FSddMS2\_150\_255\_neg\_01  
30mg/1ml 70/30 met/acqua

03/15/22 12:21:25

RT: 0.00 - 23.00 SM: 15G

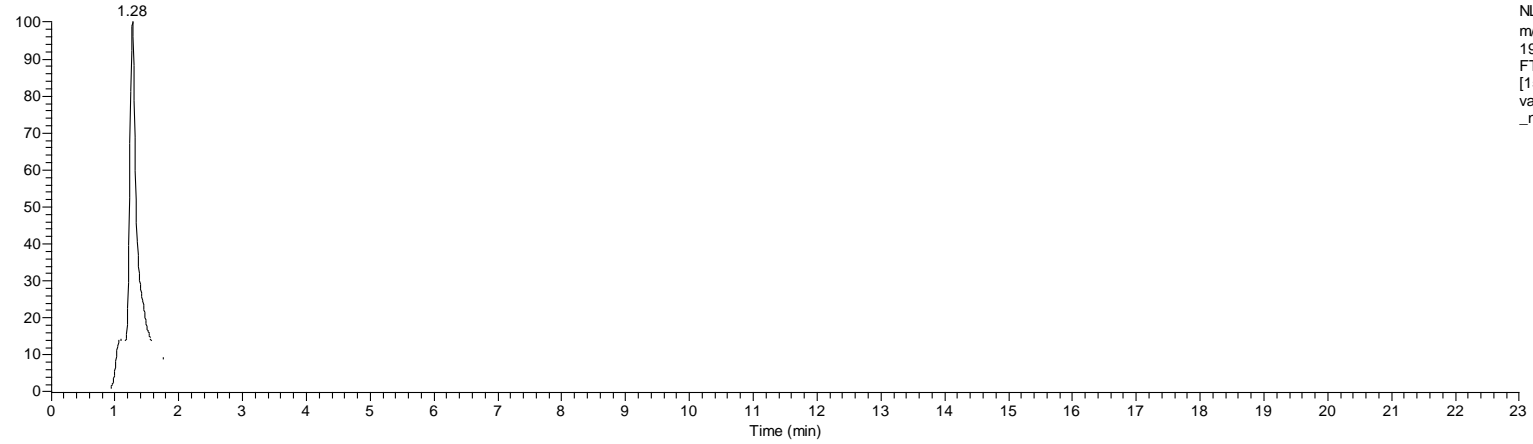

NL: 1.16E6  
m/z=  
191.01783-191.02165 F:  
FTMS - p ESI Full ms  
[150.0000-255.0000] MS  
vaso\_FSddMS2\_150\_255  
\_neg\_01

vaso\_FSddMS2\_150\_255\_neg\_01 #434-507 RT: 1.25-1.33 AV: 3 SB: 18 1.92-3.04 , 0.29-0.83 NL: 2.47E5  
F: FTMS - p ESI d Full ms2 191.0197@hcd46.67 [43.1210-215.6051]

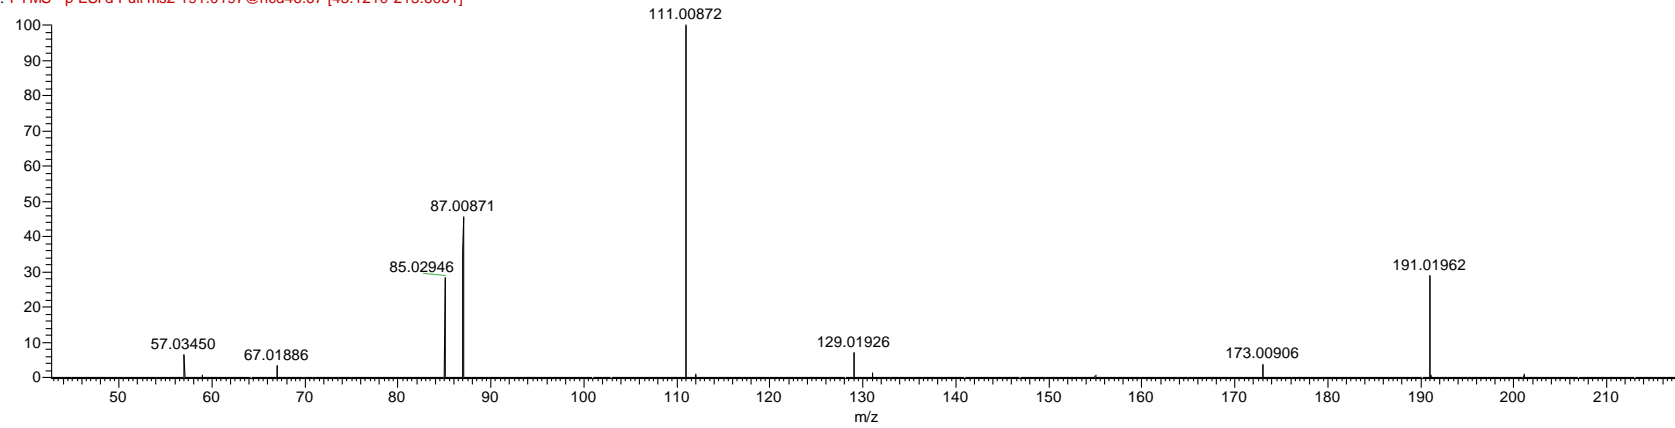

P-coumaric acid

vaso\_FSddMS2\_150\_255\_01  
30mg/1ml 70/30 met/acqua

03/14/22 16:42:48

RT: 0.00 - 23.01 SM: 15G

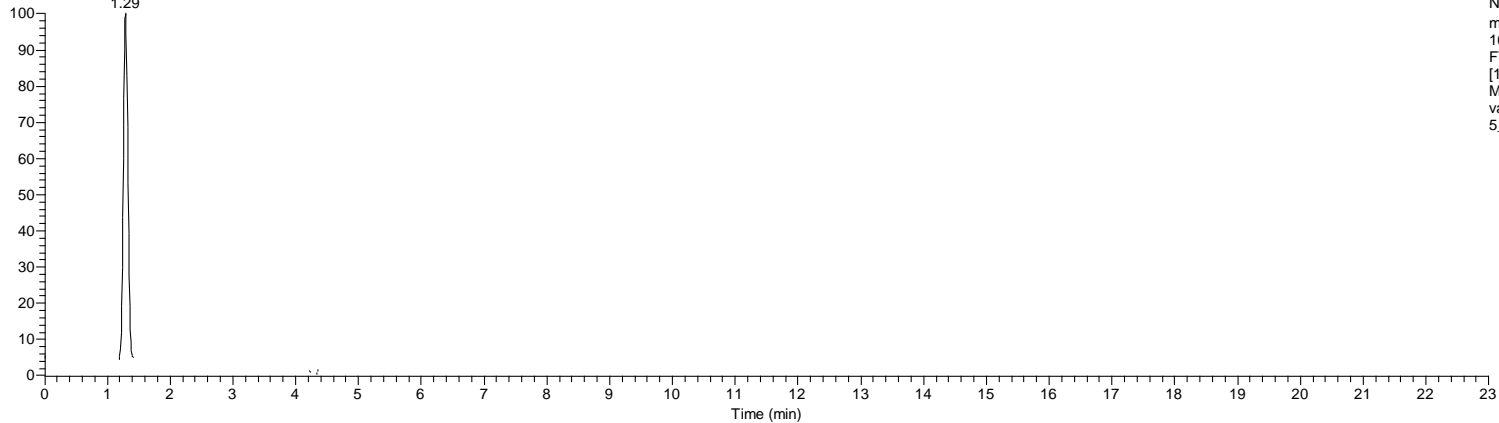

NL: 4.62E5  
m/z=  
165.05302-165.05632 F:  
FTMS + p ESI Full ms  
[150.0000-255.0000]  
MS  
vaso\_FSddMS2\_150\_25  
5\_01

vaso\_FSddMS2\_150\_255\_01 #477-571 RT: 1.28-1.33 AV: 2 SB: 6 2.79-4.24 , 2.47-19.20 NL: 5.69E4  
F: FTMS + p ESI d Full ms2 165.0805@hcd46.67 [40.0000-189.1471]

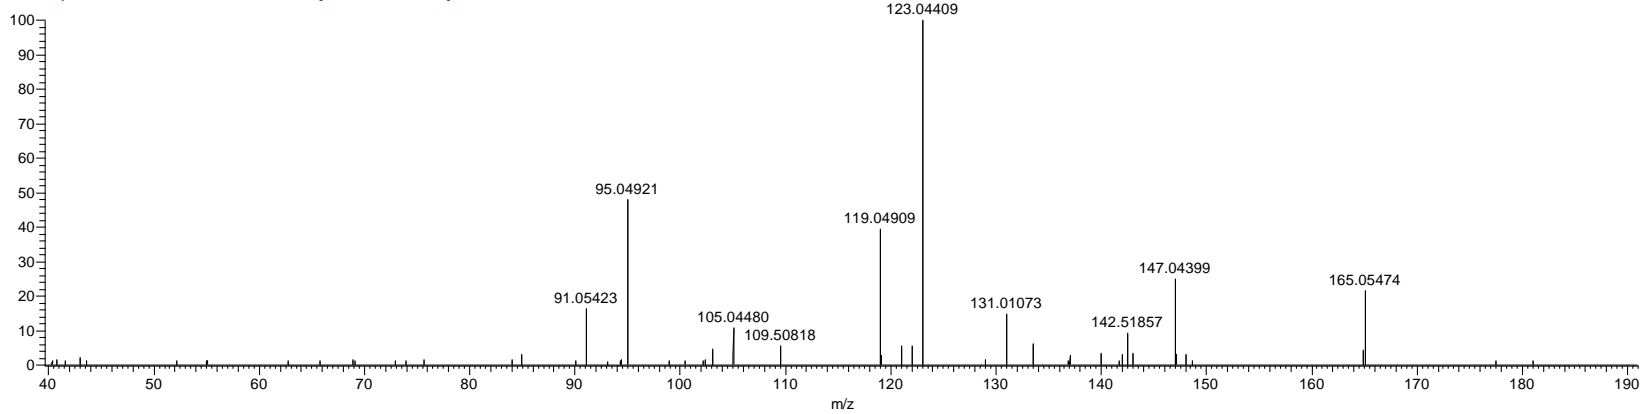

# Gentisic acid

vaso\_FSddMS2\_150\_255\_neg\_01  
30mg/1ml 70/30 met/acqua

03/15/22 12:21:25

RT: 0.00 - 23.00 SM: 15G

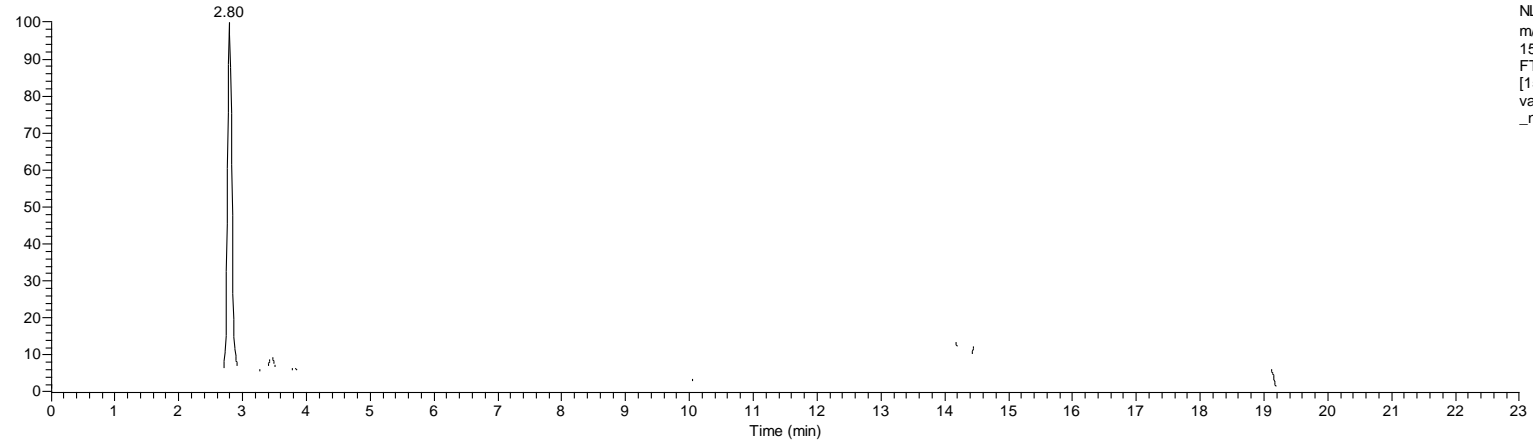

NL: 4.14E5  
m/z=  
153.01747-153.02053 F:  
FTMS - p ESI Full ms  
[150.0000-255.0000] MS  
vaso\_FSddMS2\_150\_255  
\_neg\_01

vaso\_FSddMS2\_150\_255\_neg\_01 #1054 RT: 2.79 AV: 1 SB: 4 1.34-4.93 , 0.25-0.56 NL: 1.03E5  
F: FTMS - p ESI d Full ms2 153.0194@hcd46.67 [40.0000-176.8448]

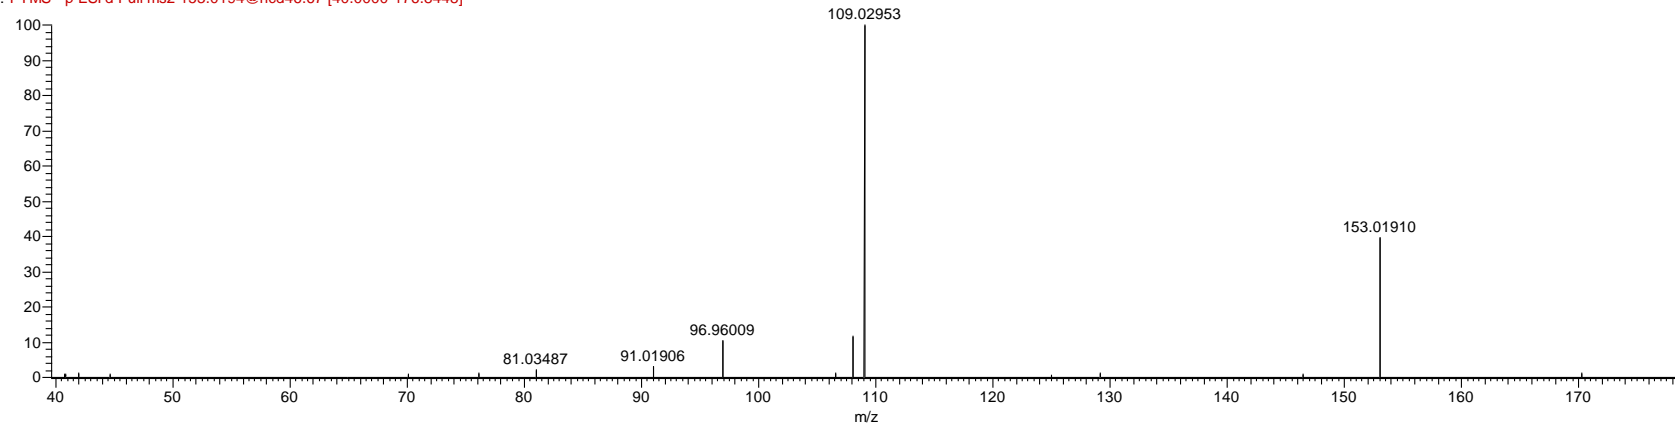



### 3-Anisic acid

vaso\_FSddMS2\_150\_255\_neg\_01  
30mg/1ml 70/30 met/acqua

03/15/22 12:21:25

RT: 0.00 - 23.00 SM: 15G

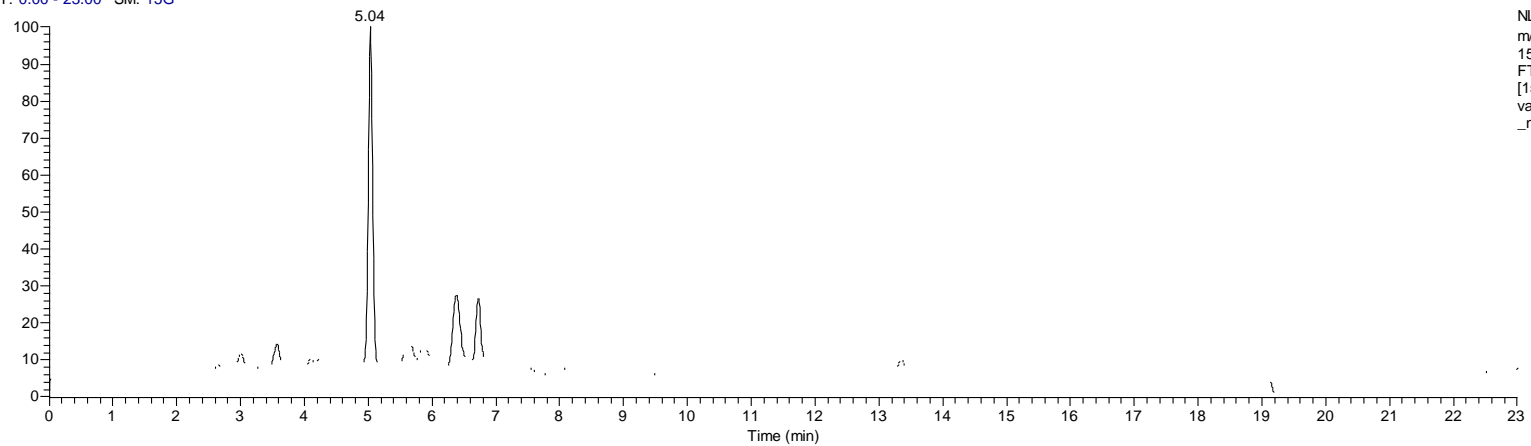

NL: 2.82E5  
m/z=  
151.03944-151.04096 F:  
FTMS - p ESI Full ms  
[150.0000-255.0000] MS  
vaso\_FSddMS2\_150\_255  
\_neg\_01

vaso\_FSddMS2\_150\_255\_neg\_01 #1958 RT: 5.01 AV: 1 SB: 11 5.84-7.14 , 0.26-4.50 NL: 1.94E5  
F: FTMS - p ESI d Full ms2 151.1129@hcd46.67 [40.0000-174.9001]

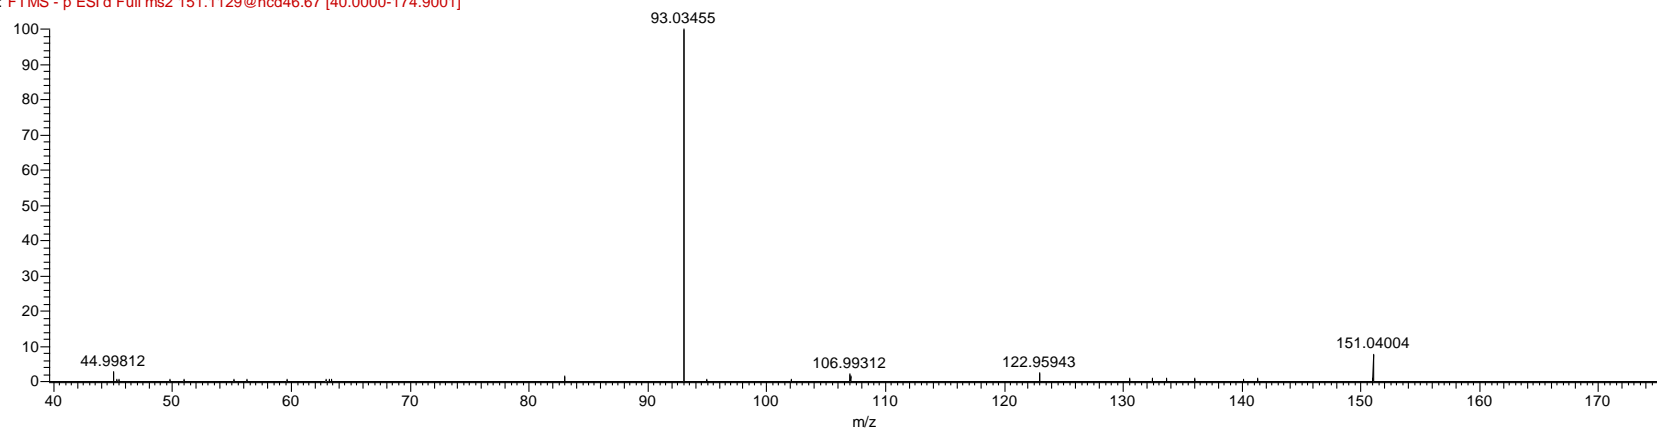

# 4-Hydroxyphenylacetic acid

vaso\_FSddMS2\_150\_255\_neg\_01  
30mg/1ml 70/30 met/acqua

03/15/22 12:21:25

RT: 0.00 - 23.00 SM: 15G

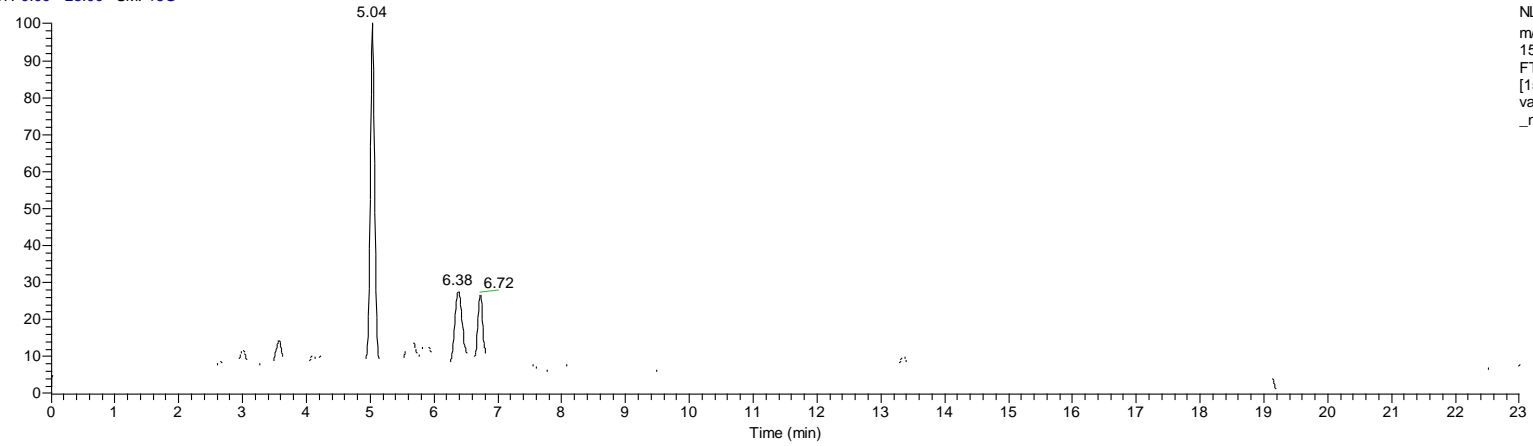

NL: 2.82E5  
m/z=  
151.03944-151.04096 F:  
FTMS - p ESI Full ms  
[150.0000-255.0000] MS  
vaso\_FSddMS2\_150\_255  
\_neg\_01

vaso\_FSddMS2\_150\_255\_neg\_01 #2478-2515 RT: 6.36-6.41 AV: 2 SB: 11 5.84-7.14 , 0.26-4.50 NL: 1.96E4  
F: FTMS - p ESI d Full ms2 151.1129@hcd46.67 [40.0000-174.9001]

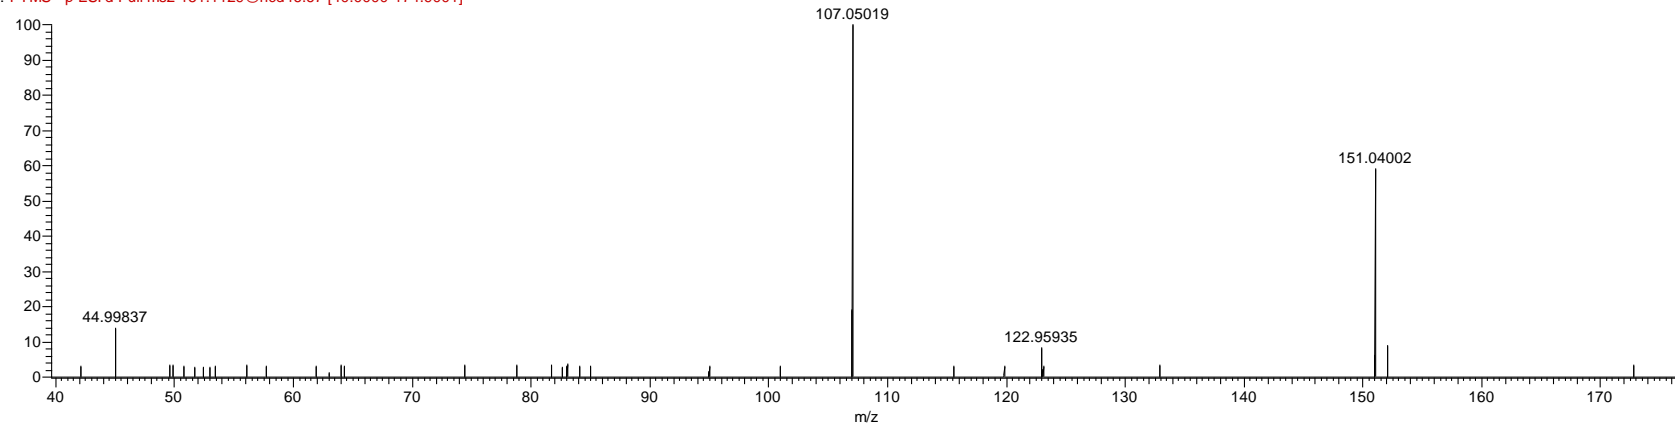

# Ferulic acid

vaso\_FSddMS2\_150\_255\_neg\_01  
30mg/1ml 70/30 met/acqua

03/15/22 12:21:25

RT: 0.00 - 23.00 SM: 15G

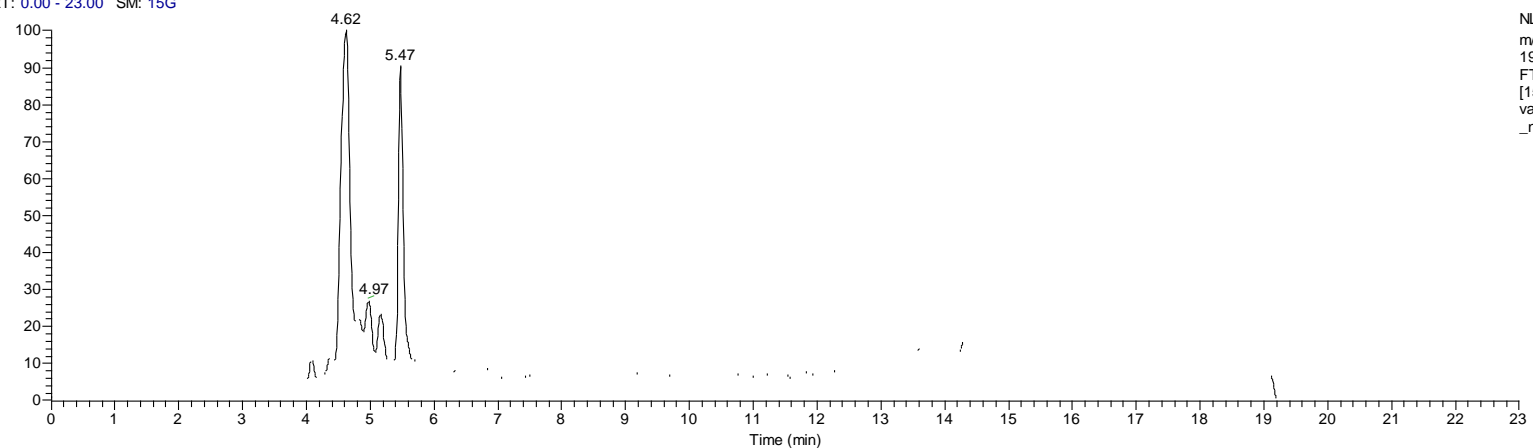

NL: 2.03E5  
m/z=  
193.04903-193.05097 F:  
FTMS - p ESI Full ms  
[150.0000-255.0000] MS  
vaso\_FSddMS2\_150\_255  
\_neg\_01

vaso\_FSddMS2\_150\_255\_neg\_01 #1717-1869 RT: 4.52-4.70 AV: 5 SB: 3 5.84-7.14, 0.26-4.50 NL: 5.73E4  
F: FTMS - p ESI d Full ms2 193.0506@hcd46.67 [43.5353-217.6766]

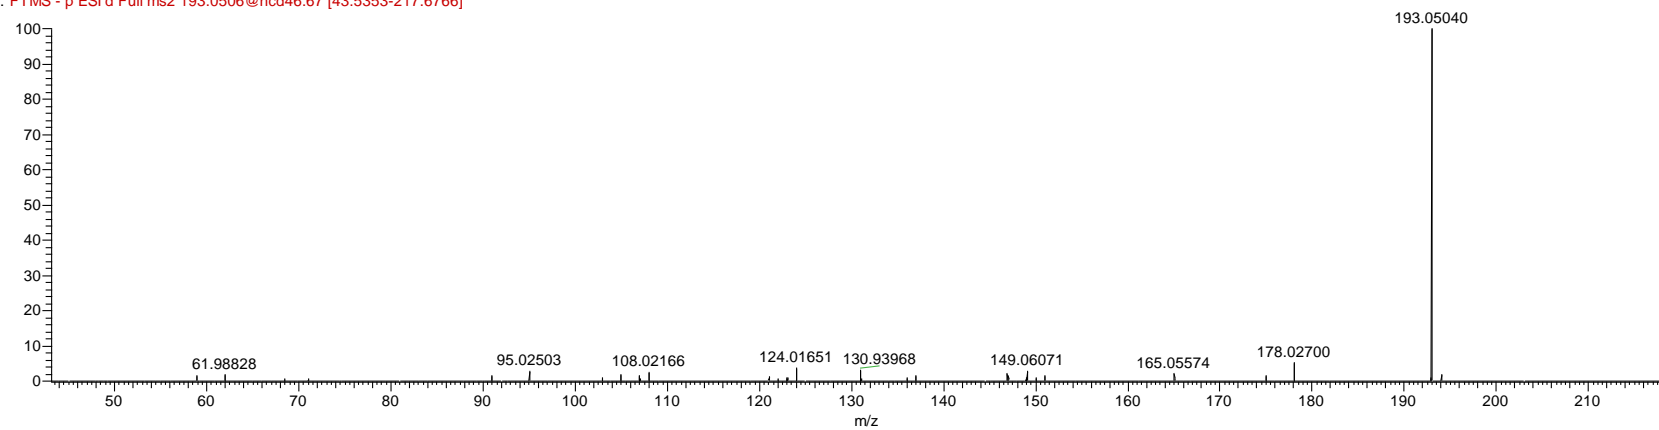

# Isoferulic acid

vaso\_FSddMS2\_150\_255\_neg\_01  
30mg/1ml 70/30 met/acqua

03/15/22 12:21:25

RT: 0.00 - 23.00 SM: 15G

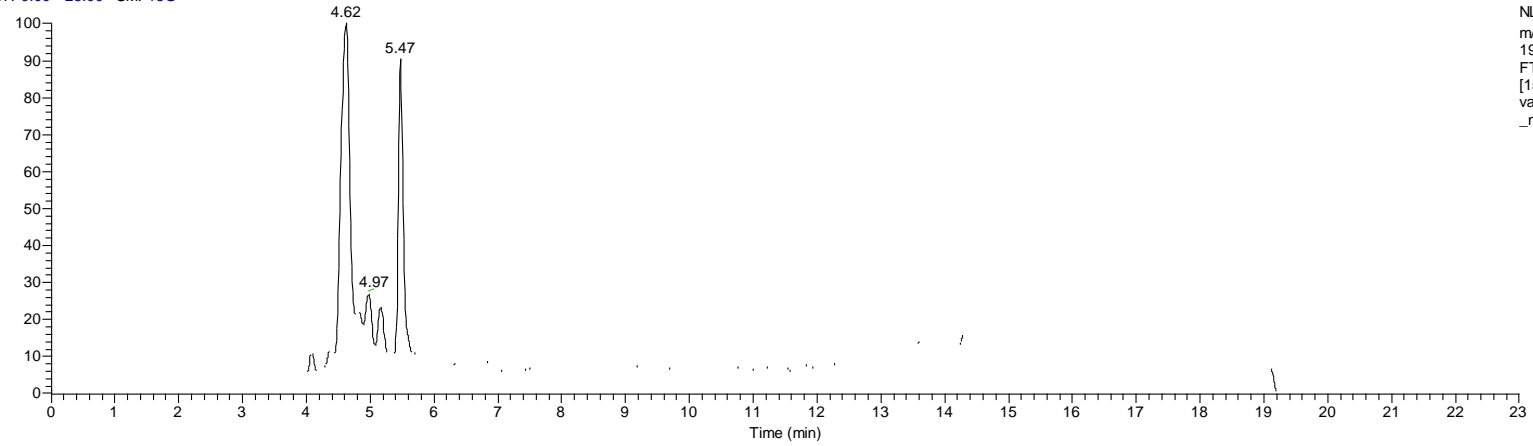

NL: 2.03E5  
m/z=  
193.04903-193.05097 F:  
FTMS - p ESI Full ms  
[150.0000-255.0000] MS  
vaso\_FSddMS2\_150\_255  
\_neg\_01

vaso\_FSddMS2\_150\_255\_neg\_01 #2098-2193 RT: 5.46-5.50 AV: 2 SB: 3 5.84-7.14, 0.26-4.50 NL: 1.23E4  
F: FTMS - p ESI d Full ms2 193.0506@hcd46.67 [43.5353-217.6766]

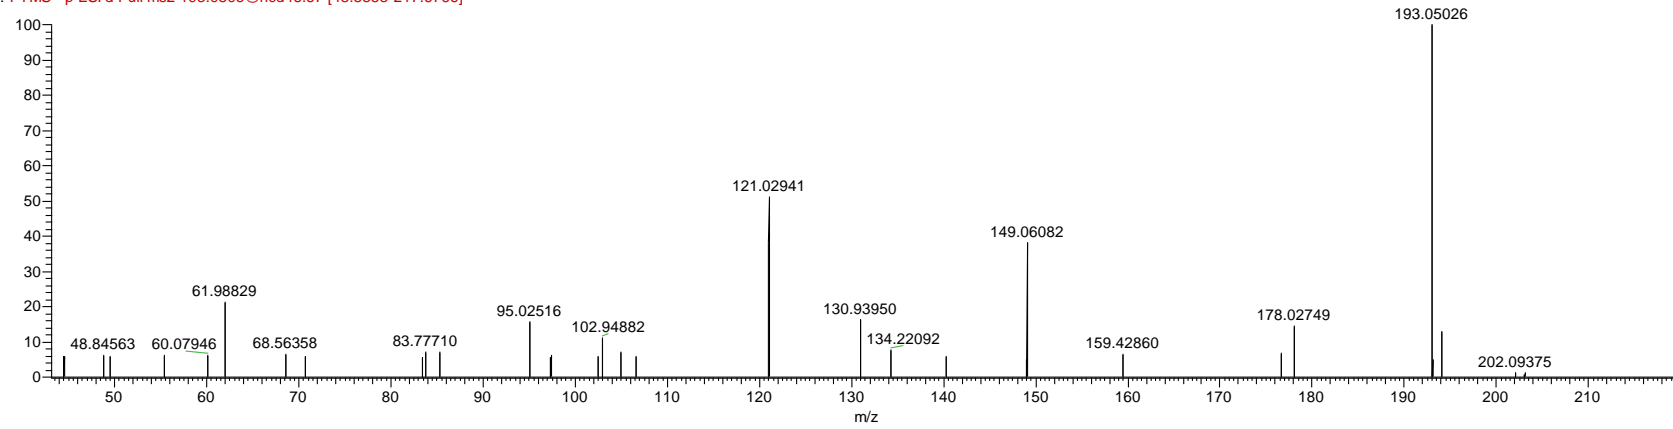

# Quercetin 3-O-acetyl-rhamnoside

vaso\_FSddMS2\_445\_850\_neg\_01  
30mg/1ml 70/30 met/acqua

03/15/22 13:09:26

RT: 0.00 - 23.00 SM: 15G

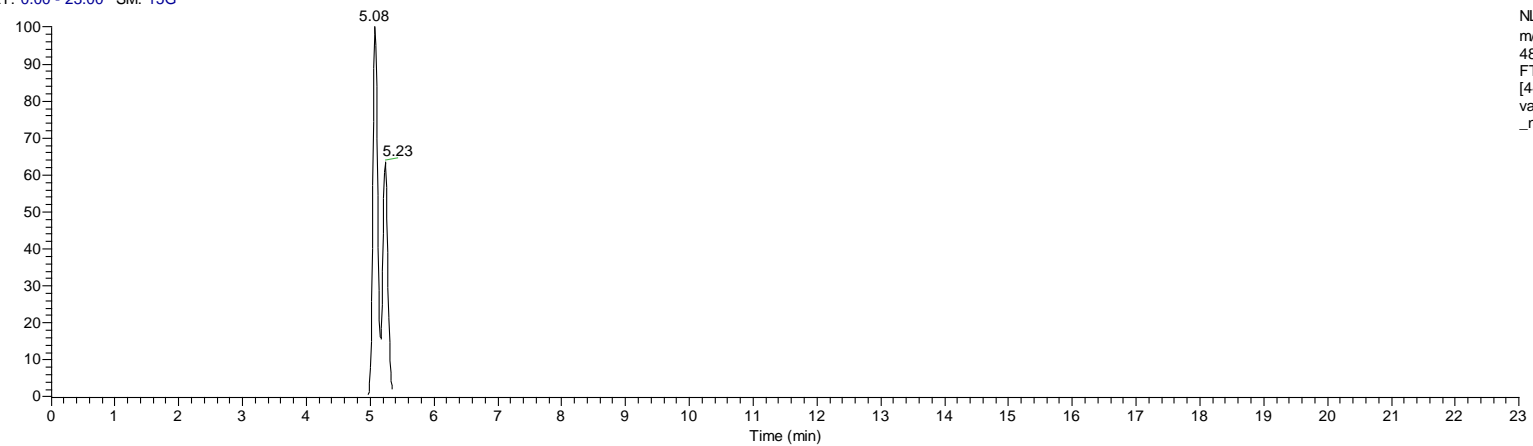

NL: 5.33E6  
m/z=  
489.08300-489.12300 F:  
FTMS - p ESI Full ms  
[445.0000-850.0000] MS  
vaso\_FSddMS2\_445\_850  
\_neg\_01

vaso\_FSddMS2\_445\_850\_neg\_01 #2066 RT: 5.05 AV: 1 NL: 5.96E5  
F: FTMS - p ESI d Full ms2 489.1040@hcd46.67 [51.9651-519.6511]

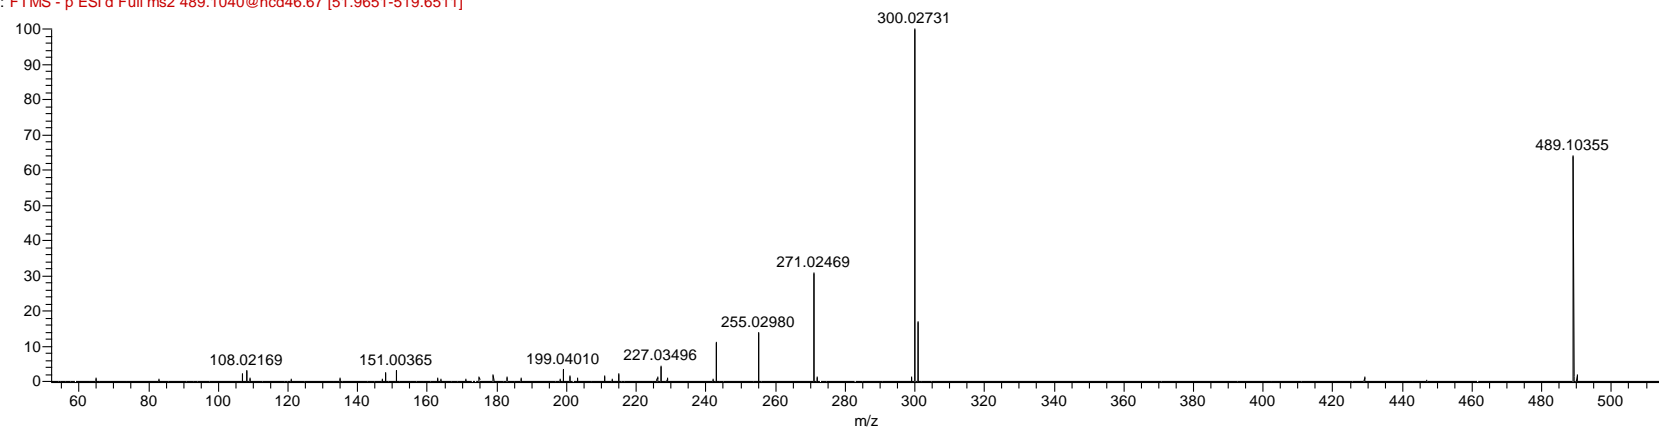

# Quercitrin

vaso\_FSddMS2\_445\_850\_neg\_01  
30mg/1ml 70/30 met/acqua

03/15/22 13:09:26

RT: 0.00 - 23.00 SM: 15G

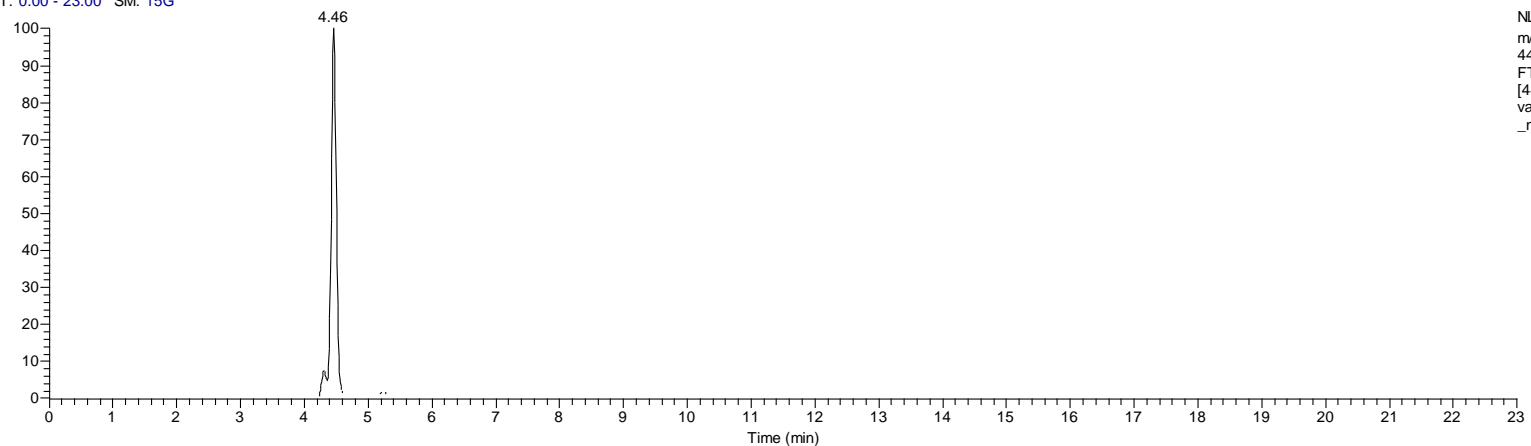

NL: 4.20E6  
m/z=  
447.07300-447.11300 F:  
FTMS - p ESI Full ms  
[445.0000-850.0000] MS  
vaso\_FSddMS2\_445\_850  
\_neg\_01

vaso\_FSddMS2\_445\_850\_neg\_01 #1814 RT: 4.44 AV: 1 NL: 9.60E5  
F: FTMS - p ESI d Full ms2 447.0932@hcd46.67 [50.0000-476.8000]

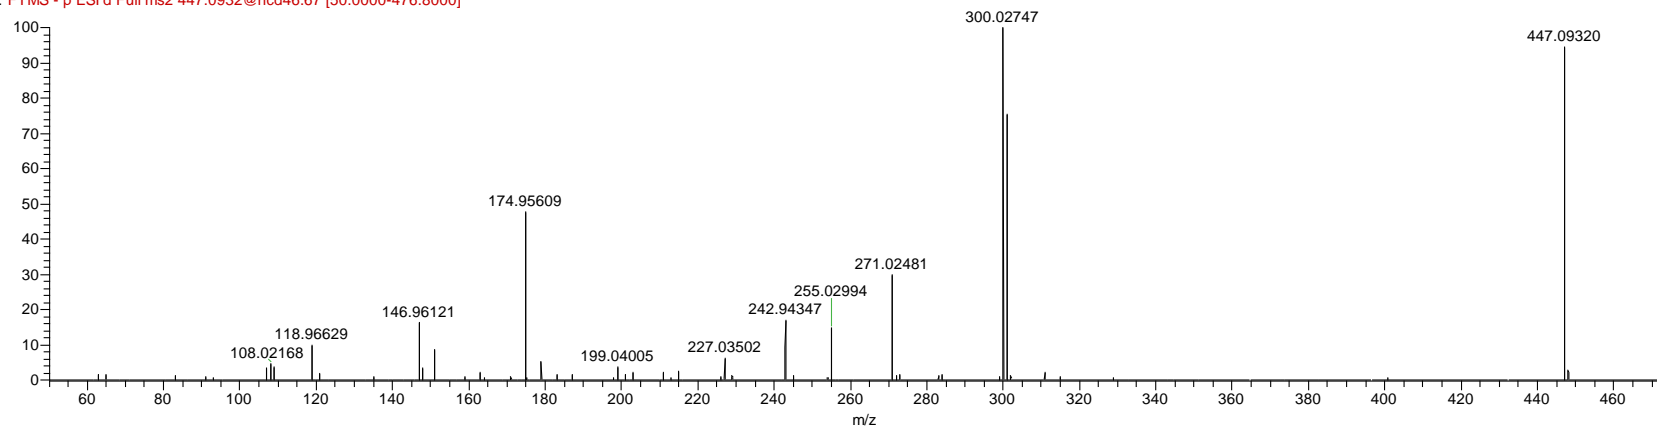

# Myricitrin

vaso\_FSddMS2\_445\_850\_neg\_01  
30mg/1ml 70/30 met/acqua

03/15/22 13:09:26

RT: 0.00 - 23.00 SM: 15G

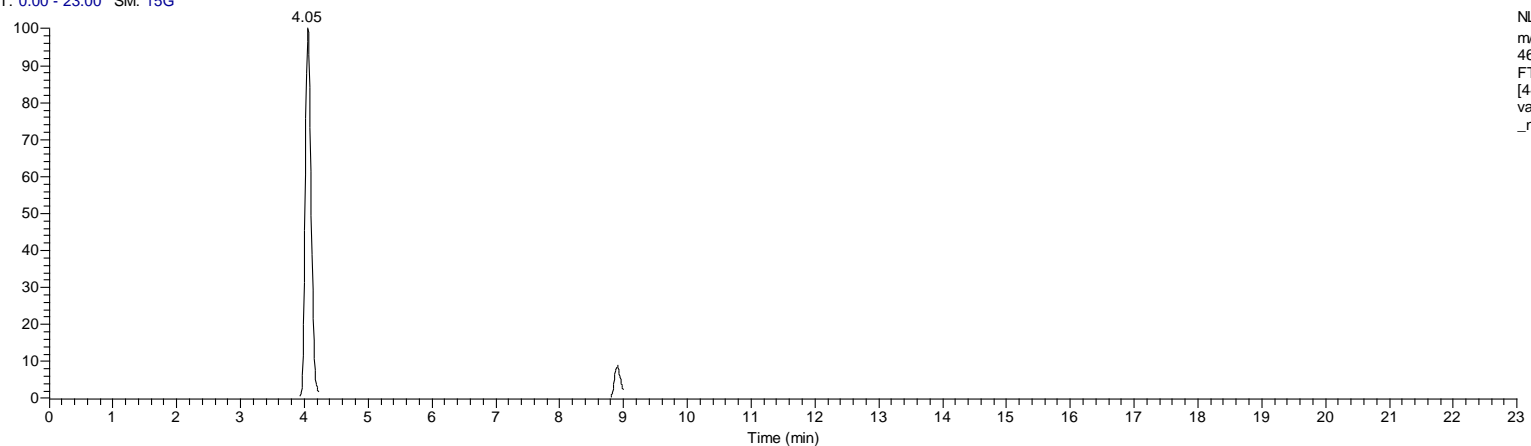

NL: 3.62E6  
m/z=  
463.06828-463.10828 F:  
FTMS - p ESI Full ms  
[445.0000-850.0000] MS  
vaso\_FSddMS2\_445\_850  
\_neg\_01

vaso\_FSddMS2\_445\_850\_neg\_01 #1654 RT: 4.06 AV: 1 NL: 8.47E5  
F: FTMS - p ESI d Full ms2 463.0511@hcd46.67 [50.0000-493.0772]

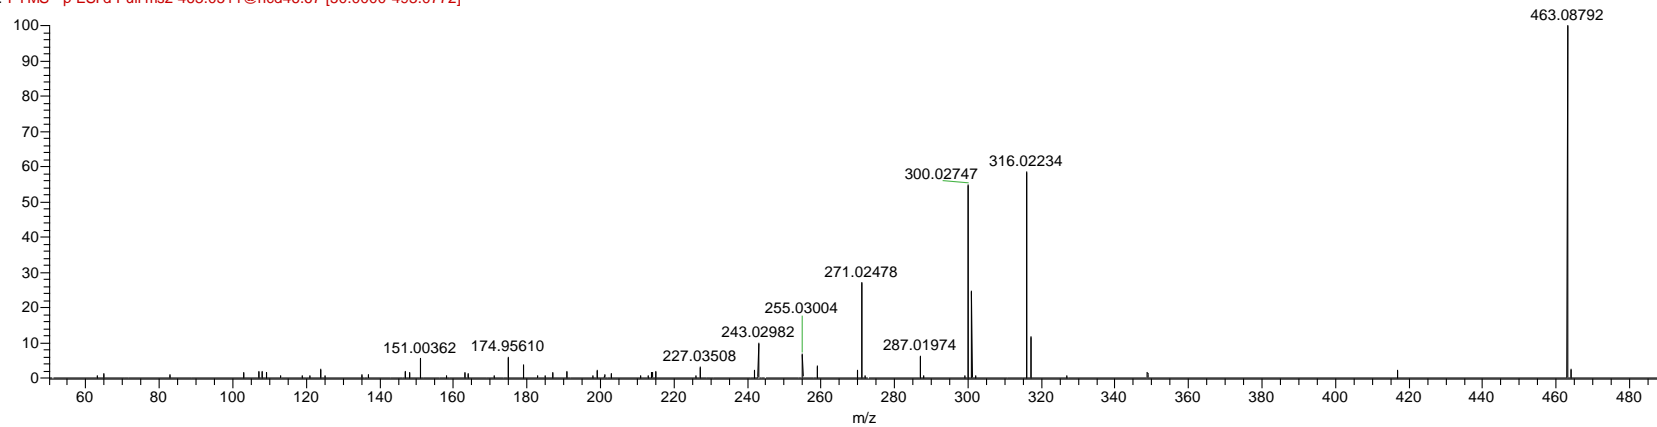

# Myricetin 3-O-galactopyranoside

vaso\_FSddMS2\_445\_850\_neg\_01  
30mg/1ml 70/30 met/acqua

03/15/22 13:09:26

RT: 0.00 - 23.00 SM: 15G

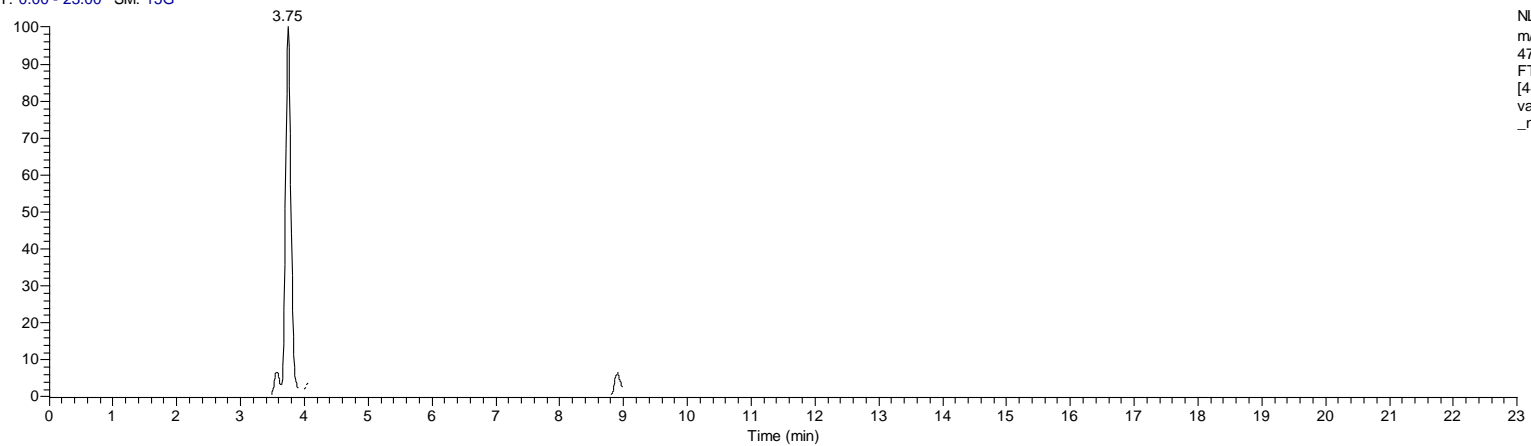

NL: 6.67E5  
m/z=  
479.06301-479.10301 F:  
FTMS - p ESI Full ms  
[445.0000-850.0000] MS  
vaso\_FSddMS2\_445\_850  
\_neg\_01

vaso\_FSddMS2\_445\_850\_neg\_01 #1512 RT: 3.72 AV: 1 SB: 3 12.10-12.57 , 2.38-4.03 NL: 3.98E4  
F: FTMS - p ESI d Full ms2 479.1576@hcd46.67 [50.9506-509.5057]

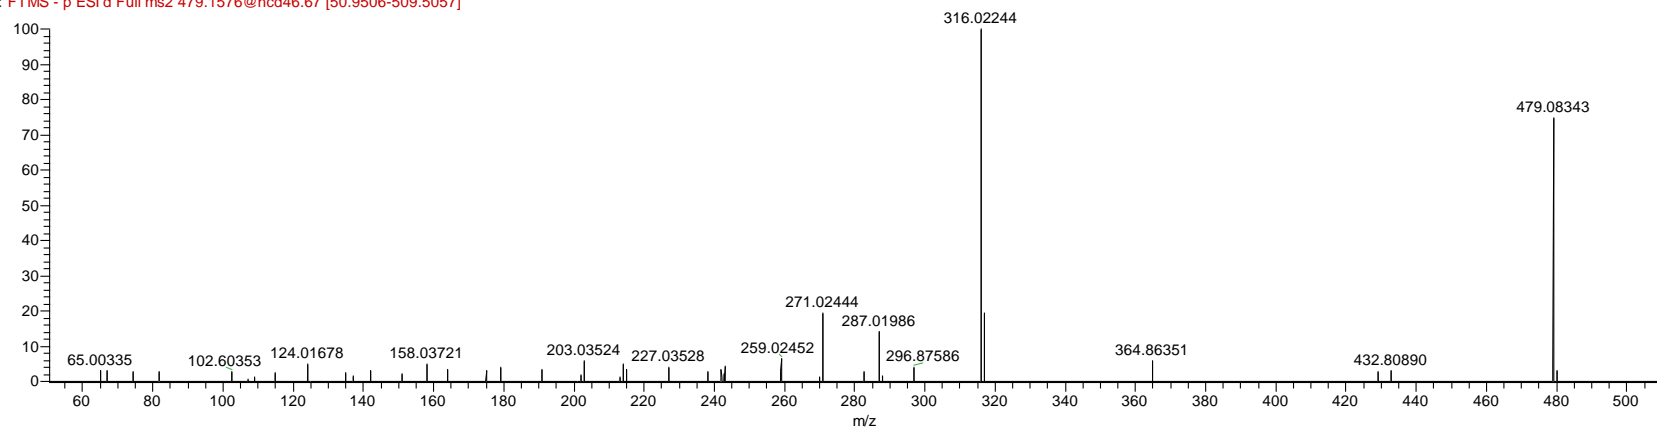



**7-Hydroxy-2-(4-hydroxyphenyl)-4-oxo-3,4-dihydro-2H-chromen-5-yl β-D-glucopyranoside (Salipurposid) o isomero Isosalipurposide**

vaso\_FSddMS2\_245\_455\_neg\_01  
30mg/1ml 70/30 met/acqua

03/15/22 12:45:25

RT: 0.00 - 23.00 SM: 15G

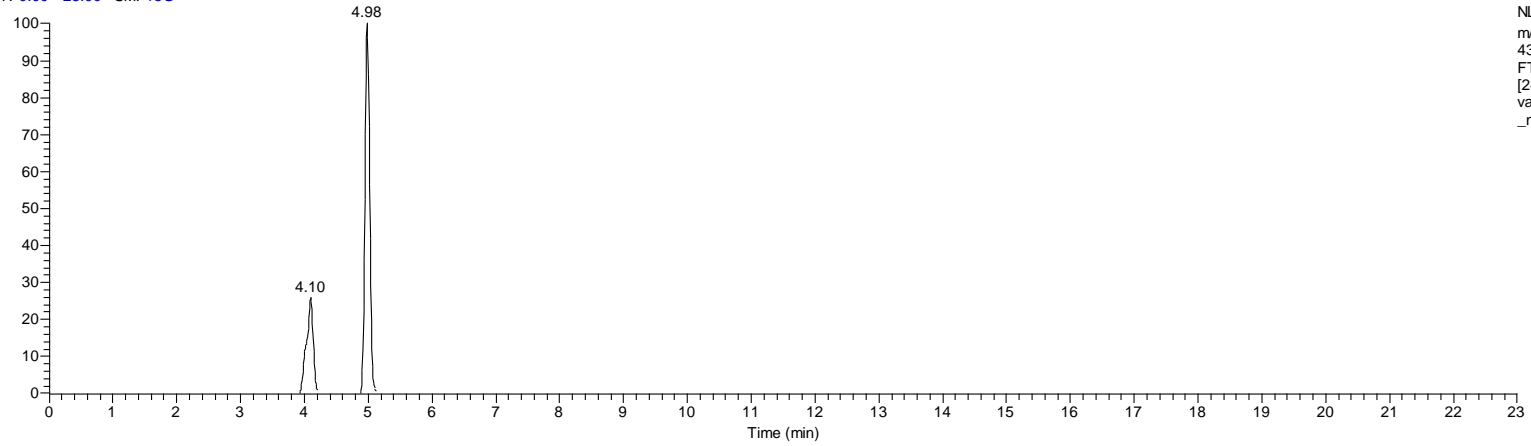

NL: 1.17E6  
m/z=  
433.11267-433.12133 F:  
FTMS - p ESI Full ms  
[245.0000-455.0000] MS  
vaso\_FSddMS2\_245\_455  
\_neg\_01

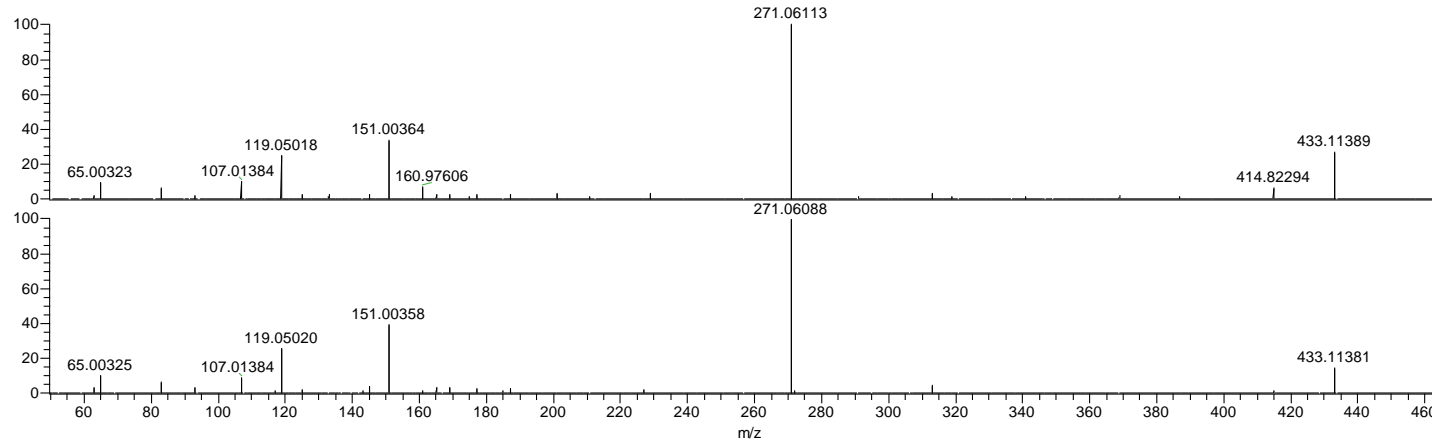

NL: 8.57E4  
vaso\_FSddMS2\_245\_455\_neg\_01#1  
608-1744 RT: 4.01-4.12 AV: 4 F:  
FTMS - p ESI d Full ms2  
433.1138@hcd46.67  
[50.0000-462.5411]

NL: 4.34E5  
vaso\_FSddMS2\_245\_455\_neg\_01#2  
062-2126 RT: 4.96-5.04 AV: 3 F:  
FTMS - p ESI d Full ms2  
433.1138@hcd46.67  
[50.0000-462.5411]

# Kaempferol 3-(2"-acetylramnoside)

vaso\_FSddMS2\_445\_850\_neg\_01  
30mg/1ml 70/30 met/acqua

03/15/22 13:09:26

RT: 0.00 - 23.00 SM: 15G

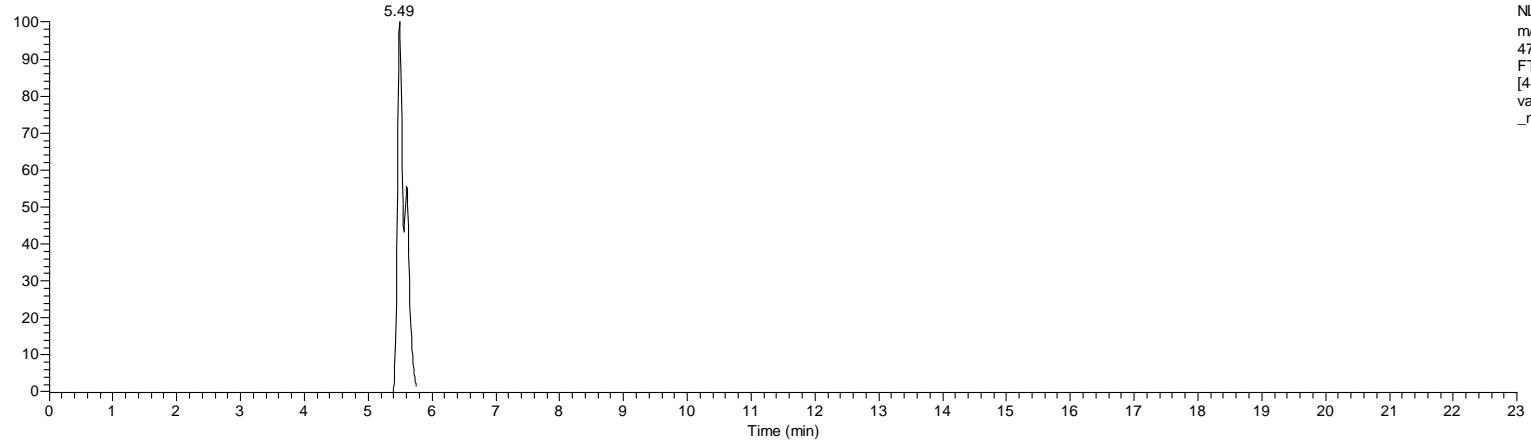

NL: 1.58E6  
m/z=  
473.08896-473.12896 F:  
FTMS - p ESI Full ms  
[445.0000-850.0000] MS  
vaso\_FSddMS2\_445\_850  
\_neg\_01

vaso\_FSddMS2\_445\_850\_neg\_01 #2241-2276 RT: 5.47-5.55 AV: 3 SB: 3 12.10-12.57 , 2.38-4.03 NL: 2.41E5  
F: FTMS - p ESI d Full ms2 473.1090@hcd46.67 [50.3336-503.3362]

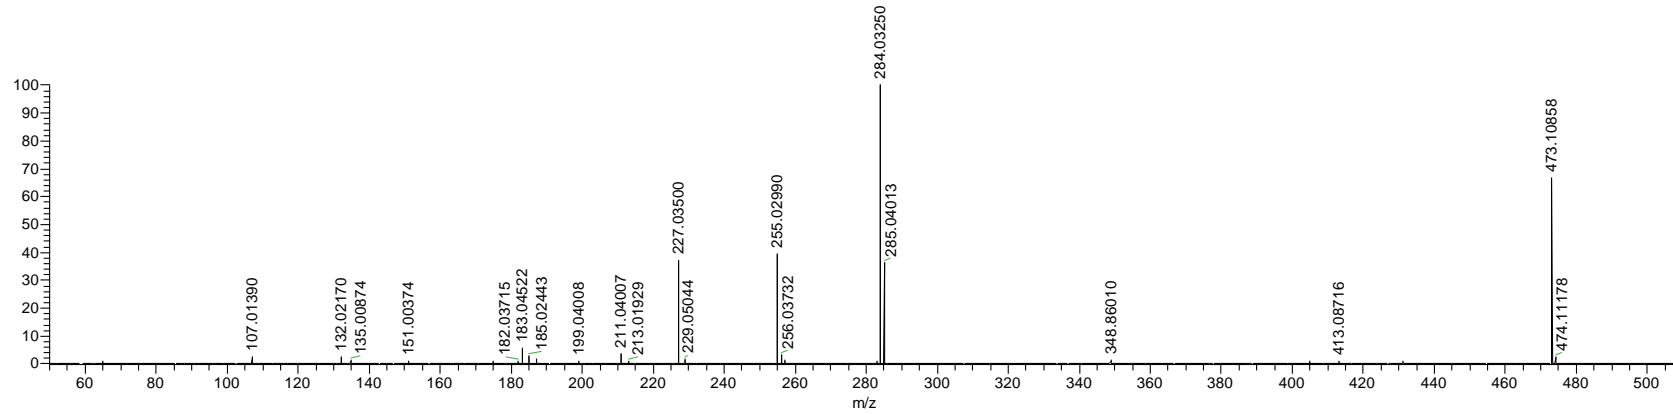

# Afzelin (kaempferol 3-rhamnoside)

vaso\_FSddMS2\_245\_455\_neg\_01  
30mg/1ml 70/30 met/acqua

03/15/22 12:45:25

RT: 0.00 - 23.00 SM: 15G

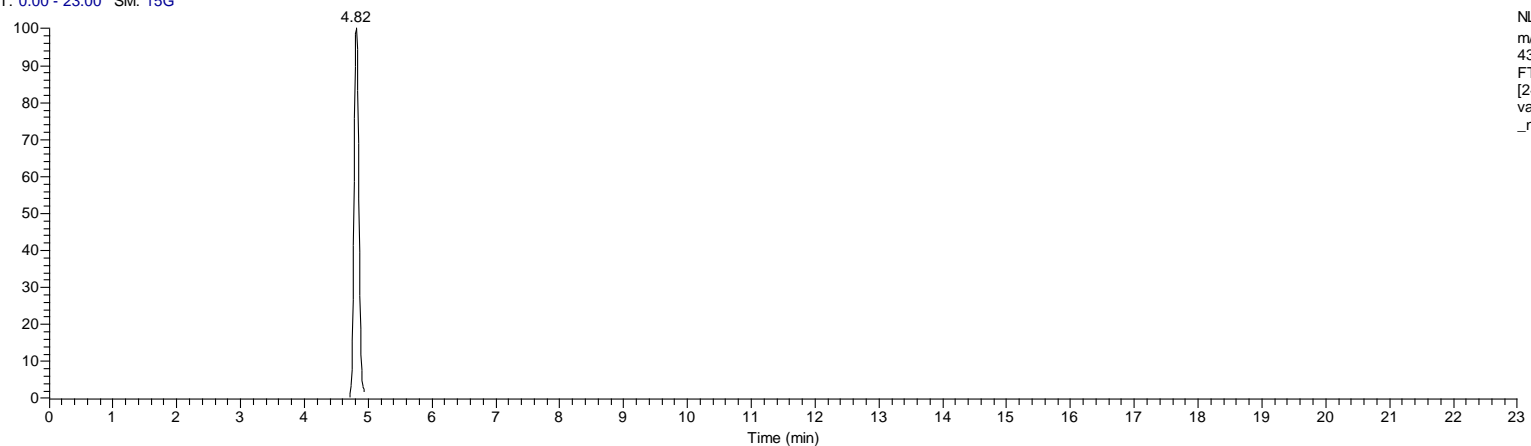

NL: 7.88E5  
m/z=  
431.09369-431.10231 F:  
FTMS - p ESI Full ms  
[245.0000-455.0000] MS  
vaso\_FSddMS2\_245\_455  
\_neg\_01

vaso\_FSddMS2\_245\_455\_neg\_01 #1989-2093 RT: 4.79-4.83 AV: 2 NL: 2.36E5  
F: FTMS - p ESI d Full ms2 431.0984@hcd46.67 [50.0000-460.4853]

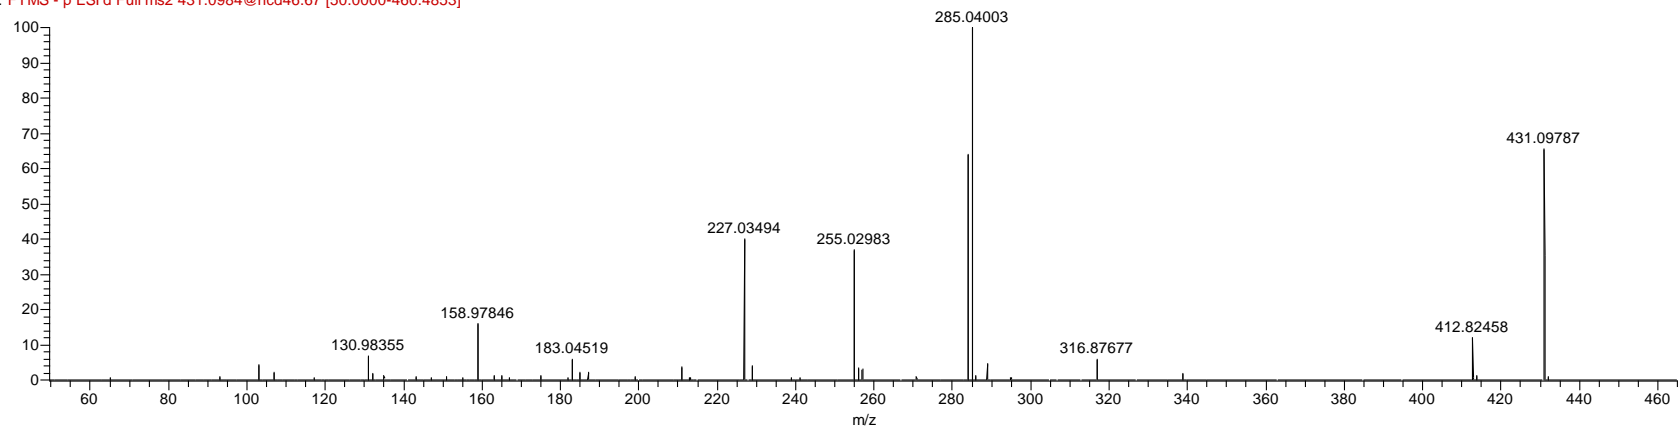

# Naringenin

vaso\_FSddMS2\_245\_455\_01  
30mg/1ml 70/30 met/acqua

03/14/22 17:06:52

RT: 0.00 - 23.00 SM: 15G

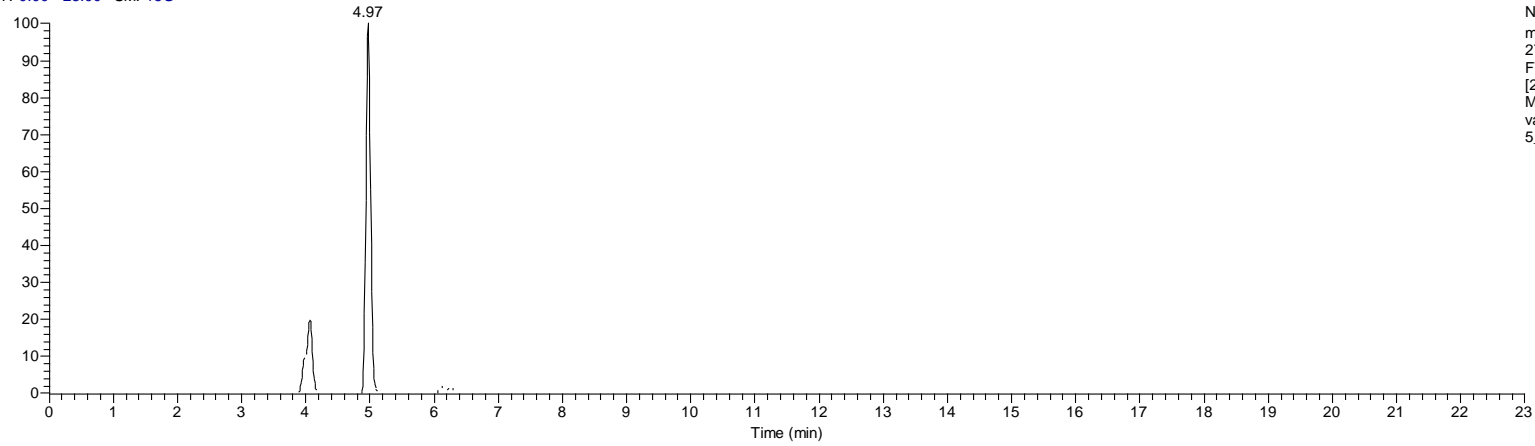

NL: 3.46E5  
m/z=  
273.07438-273.07712 F:  
FTMS + p ESI Full ms  
[245.0000-455.0000]  
MS  
vaso\_FSddMS2\_245\_45  
5\_01

vaso\_FSddMS2\_245\_455\_01 #1905-2022 RT: 4.96-5.04 AV: 2 SB: 35 3.13-3.62, 10.73-18.27 NL: 4.89E4  
F: FTMS + p ESI d Full ms2 273.0645@hcd46.67 [50.0000-299.2908]

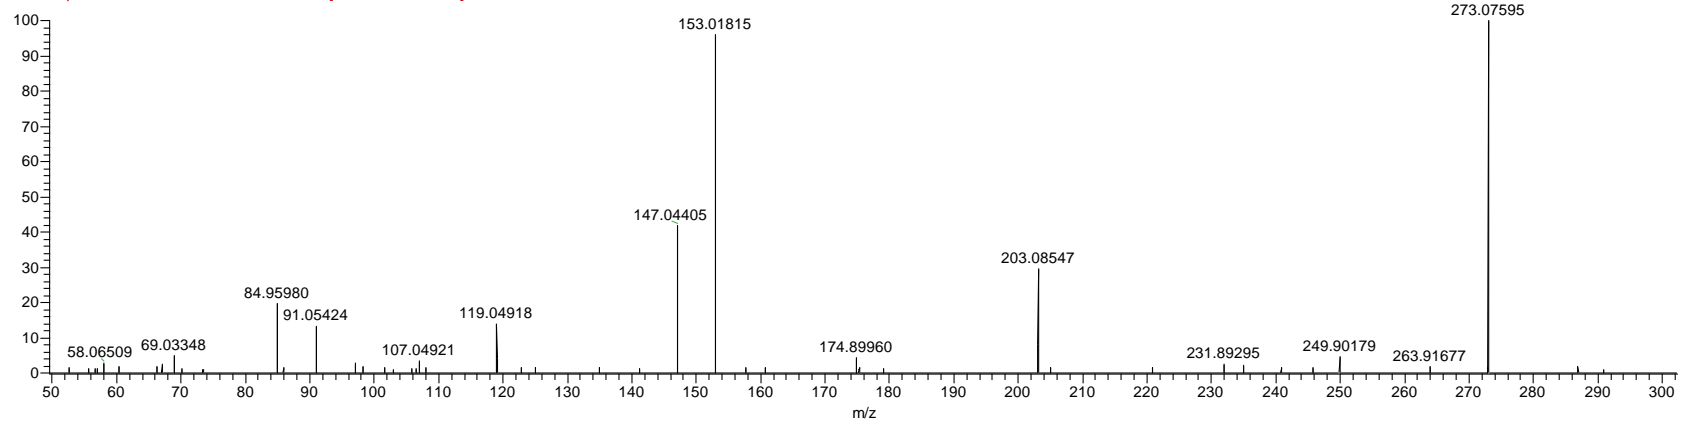

# 18-β-Glycyrrhetic acid

vaso\_FSddMS2\_445\_850\_neg\_01  
30mg/1ml 70/30 met/acqua

03/15/22 13:09:26

RT: 0.00 - 23.00 SM: 15G

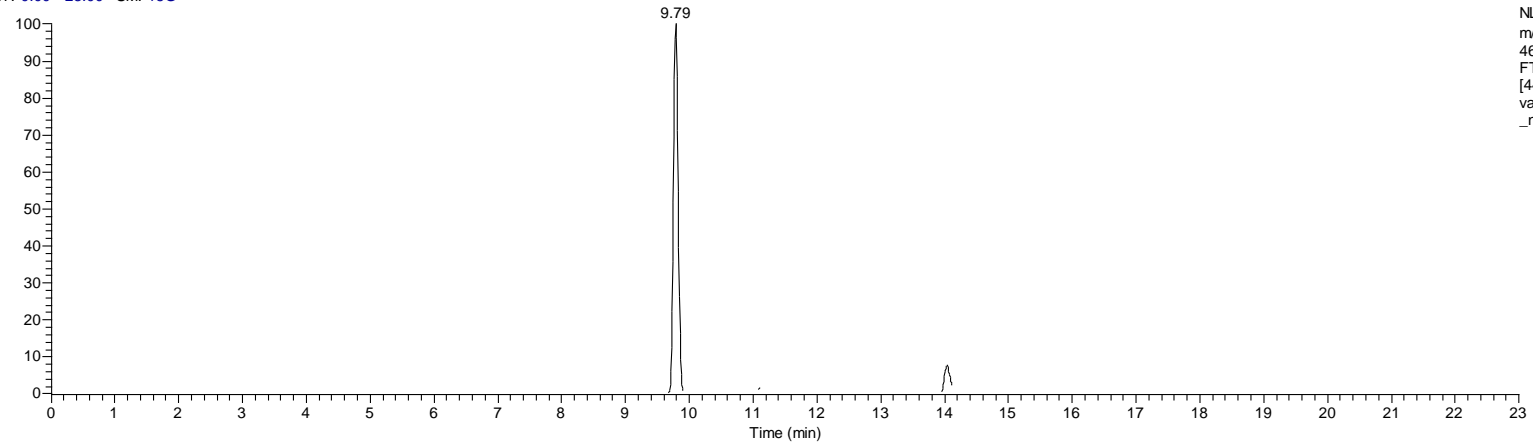

NL: 2.40E5  
m/z=  
469.32700-469.33700 F:  
FTMS - p ESI Full ms  
[445.0000-850.0000] MS  
vaso\_FSddMS2\_445\_850  
\_neg\_01

vaso\_FSddMS2\_445\_850\_neg\_01 #3934-4041 RT: 9.78-9.83 AV: 2 NL: 6.65E4  
F: FTMS - p ESI d Full ms2 469.3323@hcd46.67 [50.0000-499.4840]

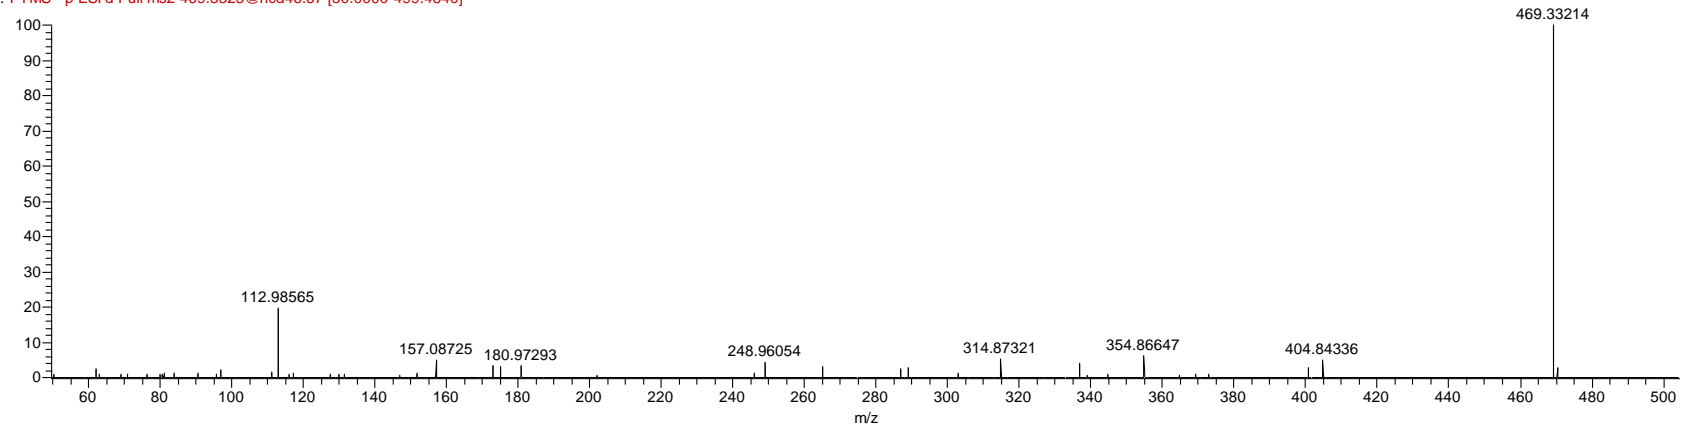

# Neovasipridone E

vaso\_FSddMS2\_245\_455\_01  
30mg/1ml 70/30 met/acqua

03/14/22 17:06:52

RT: 0.00 - 23.00 SM: 15G

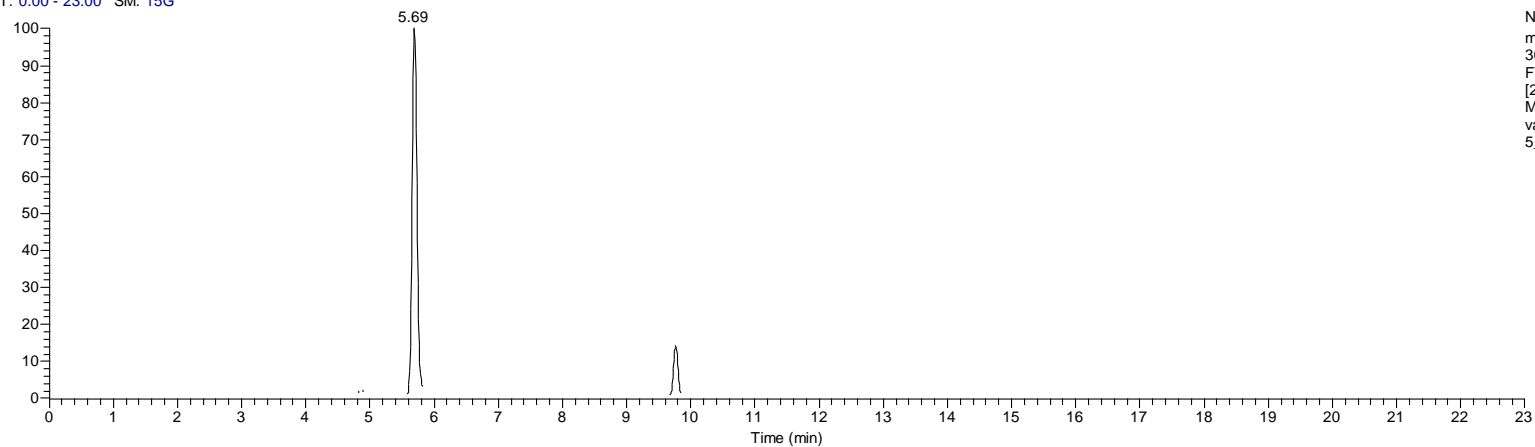

NL: 8.75E5  
m/z=  
308.21892-308.22508 F:  
FTMS + p ESI Full ms  
[245.0000-455.0000]  
MS  
vaso\_FSddMS2\_245\_45  
5\_01

vaso\_FSddMS2\_245\_455\_01 #2252-2329 RT: 5.68-5.73 AV: 2 NL: 3.84E5  
F: FTMS + p ESI d Full ms2 308.2221@hcd46.67 [50.0000-335.1515]

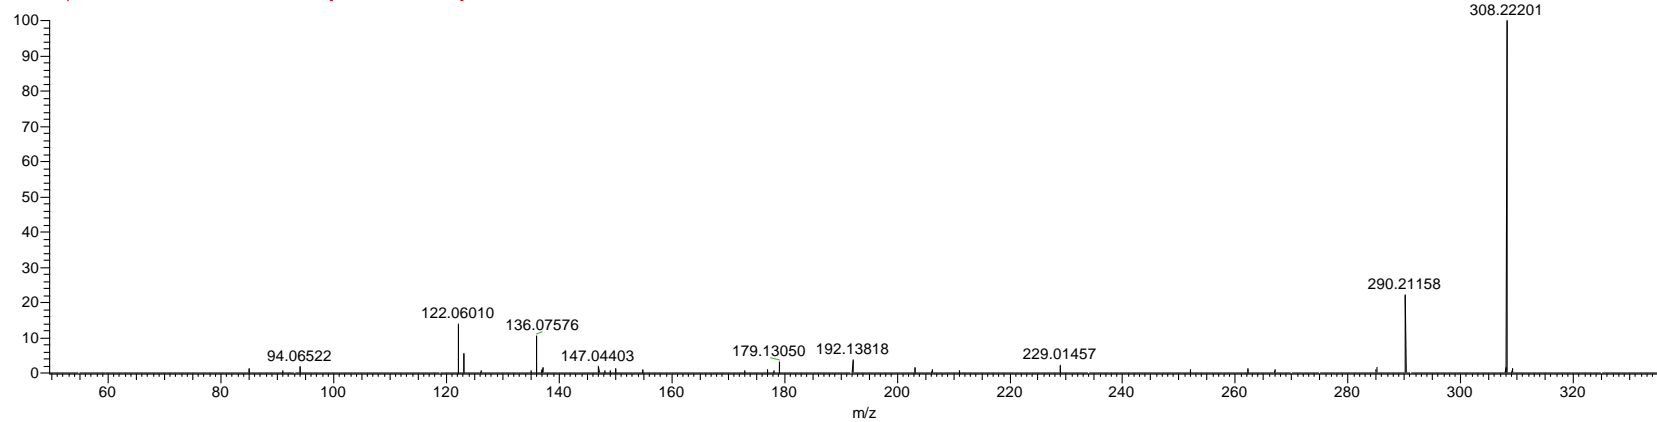

# Aspernigrin A

vaso\_FSddMS2\_150\_255\_01  
30mg/1ml 70/30 met/acqua

03/14/22 16:42:48

RT: 0.00 - 23.01 SM: 3G

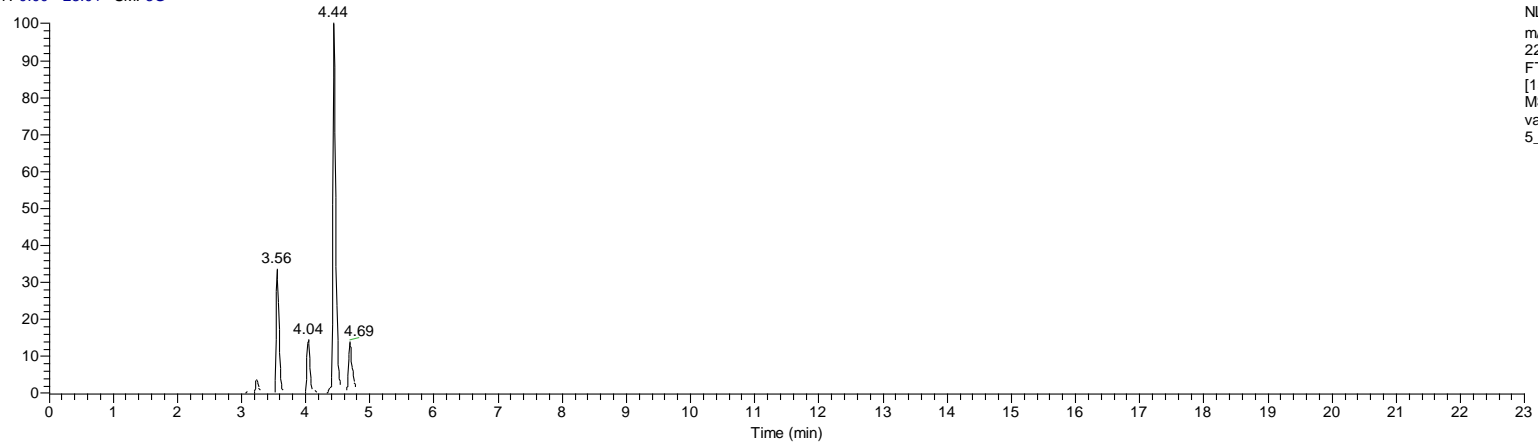

NL: 4.30E6  
m/z=  
229.09471-229.09929 F:  
FTMS + p ESI Full ms  
[150.0000-255.0000]  
MS  
vaso\_FSddMS2\_150\_25  
5\_01

vaso\_FSddMS2\_150\_255\_01 #2018 RT: 4.67 AV: 1 NL: 1.60E5  
F: FTMS + p ESI d Full ms2 229.0682@hcd46.67 [50.0000-254.4146]

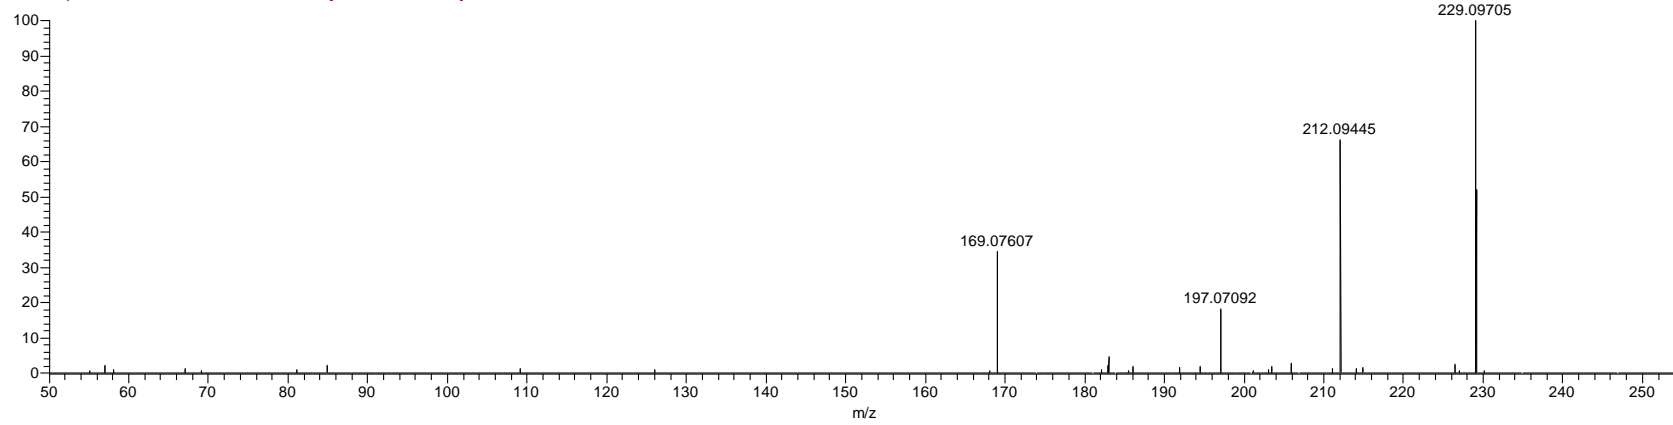

# Libertellenone G

vaso\_FSddMS2\_245\_455\_01  
30mg/1ml 70/30 met/acqua

03/14/22 17:06:52

RT: 0.00 - 23.00 SM: 15G

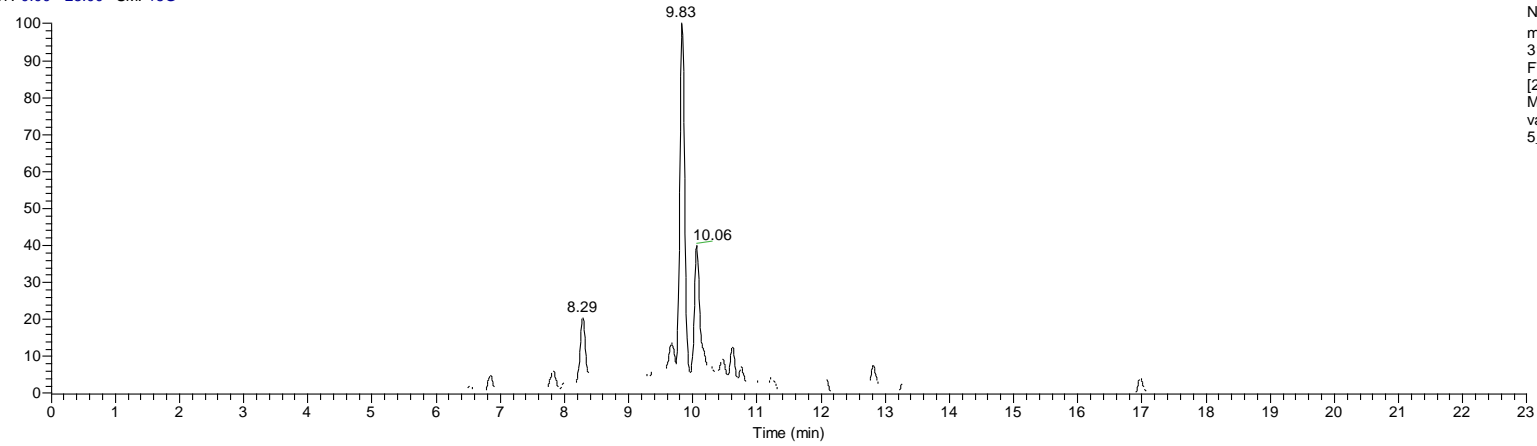

NL: 1.67E5  
m/z=  
315.19185-315.19815 F:  
FTMS + p ESI Full ms  
[245.0000-455.0000]  
MS  
vaso\_FSddMS2\_245\_45  
5\_01

vaso\_FSddMS2\_245\_455\_01 #3970-4008 RT: 9.83-9.87 AV: 2 SB: 2 5.55-8.24 , 1.27-3.73 NL: 4.42E4  
F: FTMS + p ESI d Full ms2 315.2294@hcd46.67 [50.0000-342.2990]

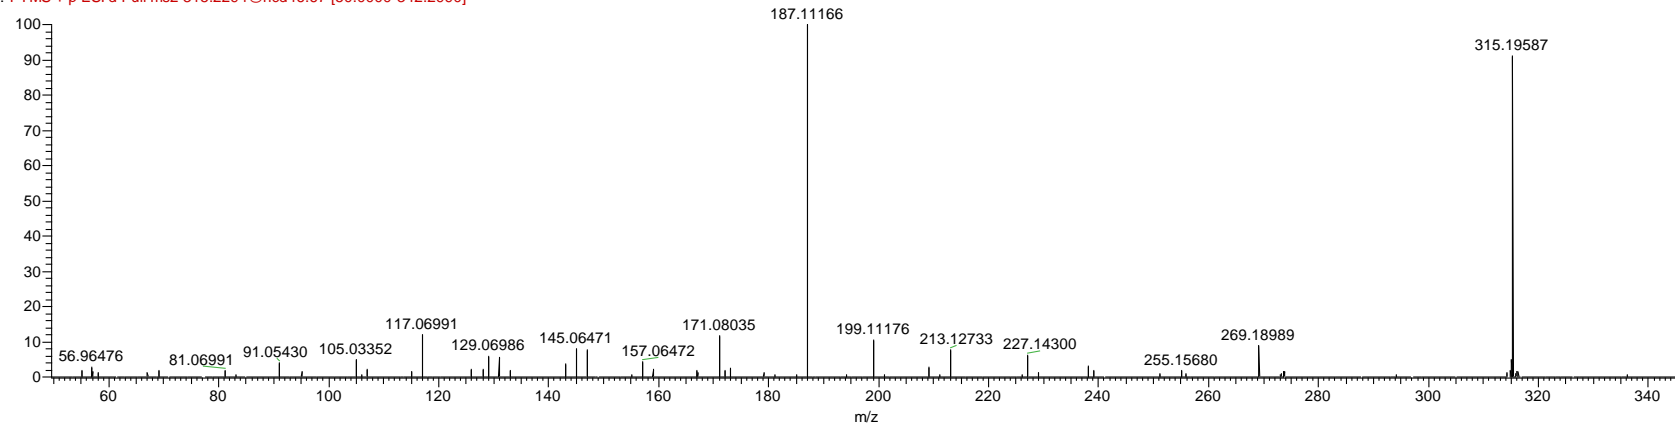



# 2-furoylglycine

vaso\_FSddMS2\_150\_255\_neg\_01  
30mg/1ml 70/30 met/acqua

03/15/22 12:21:25

RT: 0.00 - 23.00 SM: 15G

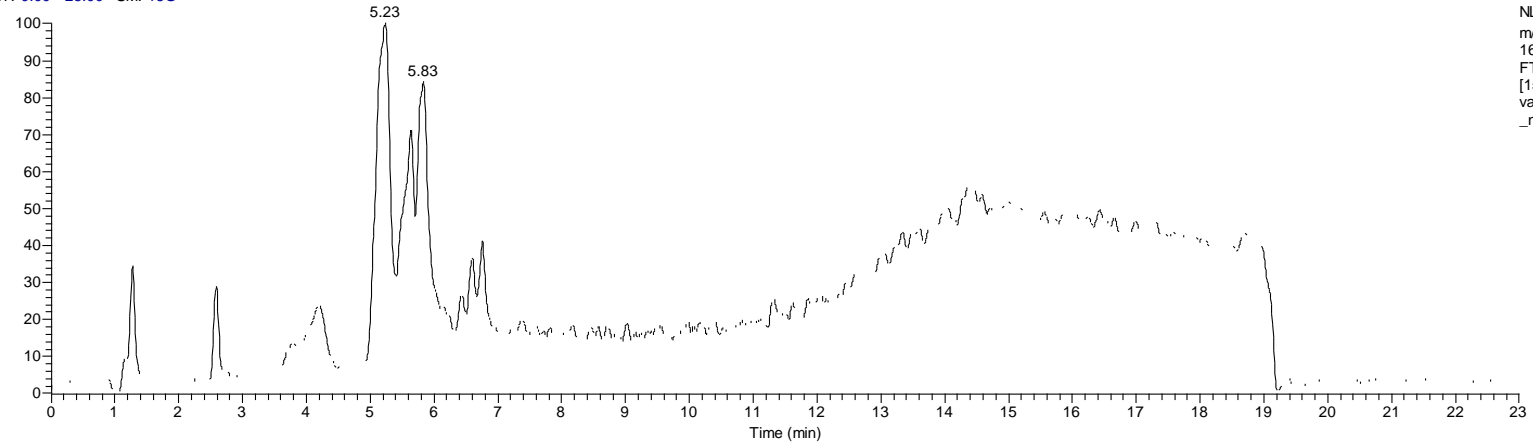

NL: 1.14E5  
m/z=  
168.02936-168.03104 F:  
FTMS - p ESI Full ms  
[150.0000-255.0000] MS  
vaso\_FSddMS2\_150\_255  
\_neg\_01

vaso\_FSddMS2\_150\_255\_neg\_01 #1934-2071 RT: 5.12-5.26 AV: 4 SB: 2 1.34-4.93, 0.25-0.56 NL: 2.18E4  
F: FTMS - p ESI d Full ms2 168.0245@hcd46.67 [40.0000-192.1500]

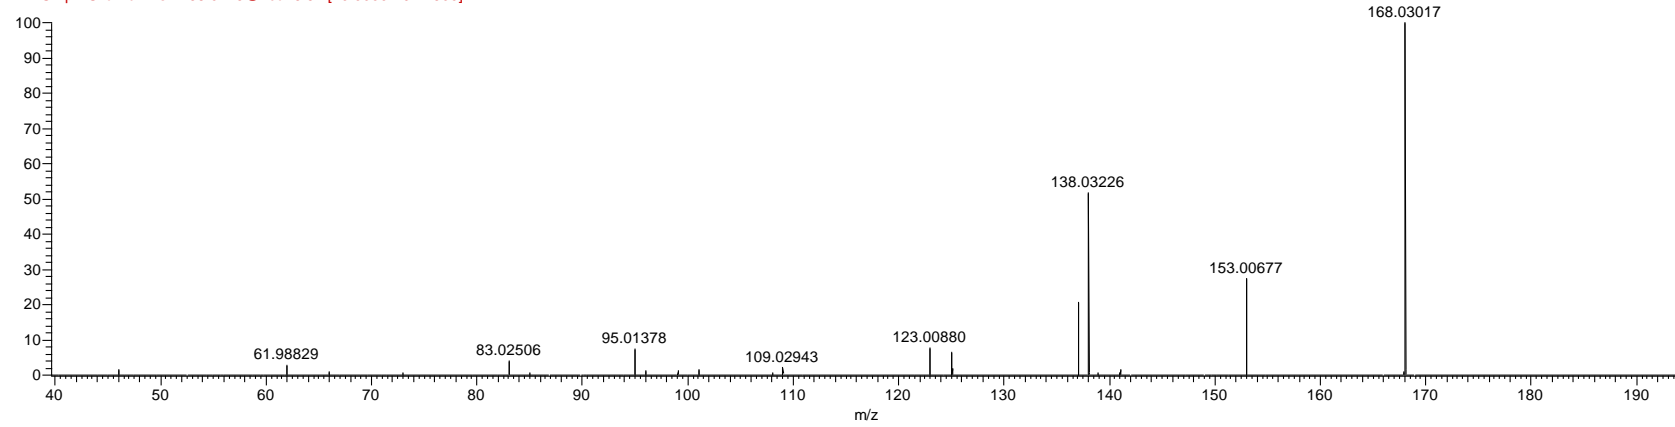

# Unknown I

vaso\_FSddMS2\_245\_455\_01  
30mg/1ml 70/30 met/acqua

03/14/22 17:06:52

RT: 0.00 - 23.00 SM: 15G

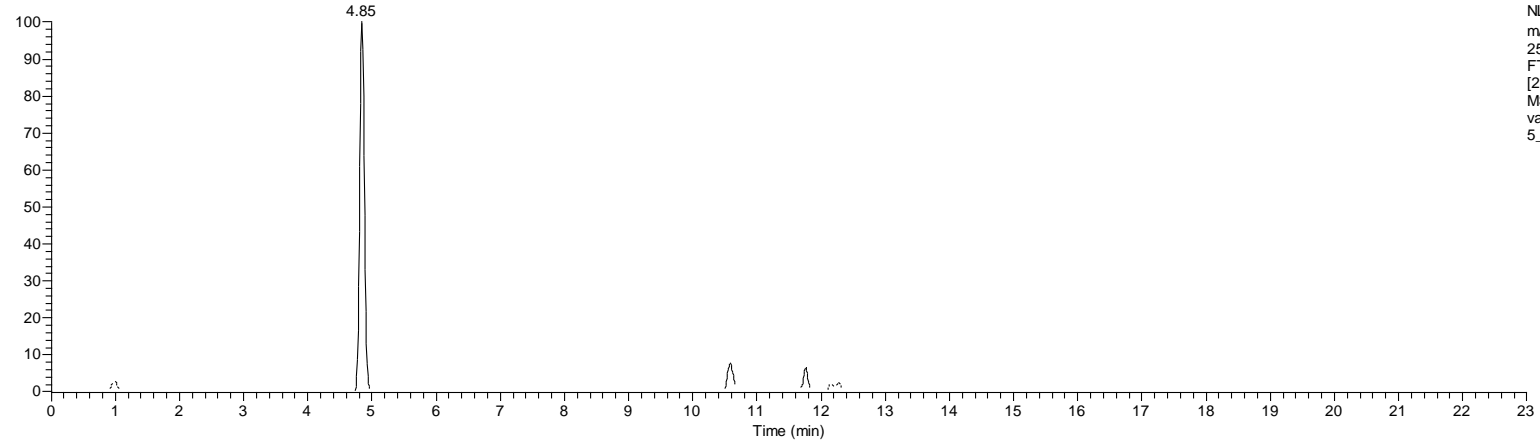

NL: 7.76E5  
m/z=  
252.10548-252.11052 F:  
FTMS + p ESI Full ms  
[245.0000-455.0000]  
MS  
vaso\_FSddMS2\_245\_45  
5\_01

vaso\_FSddMS2\_245\_455\_01 #1848-1985 RT: 4.83-4.88 AV: 2 NL: 1.53E5  
F: FTMS + p ESI d Full ms2 252.0908@hcd46.67 [50.0000-277.8976]

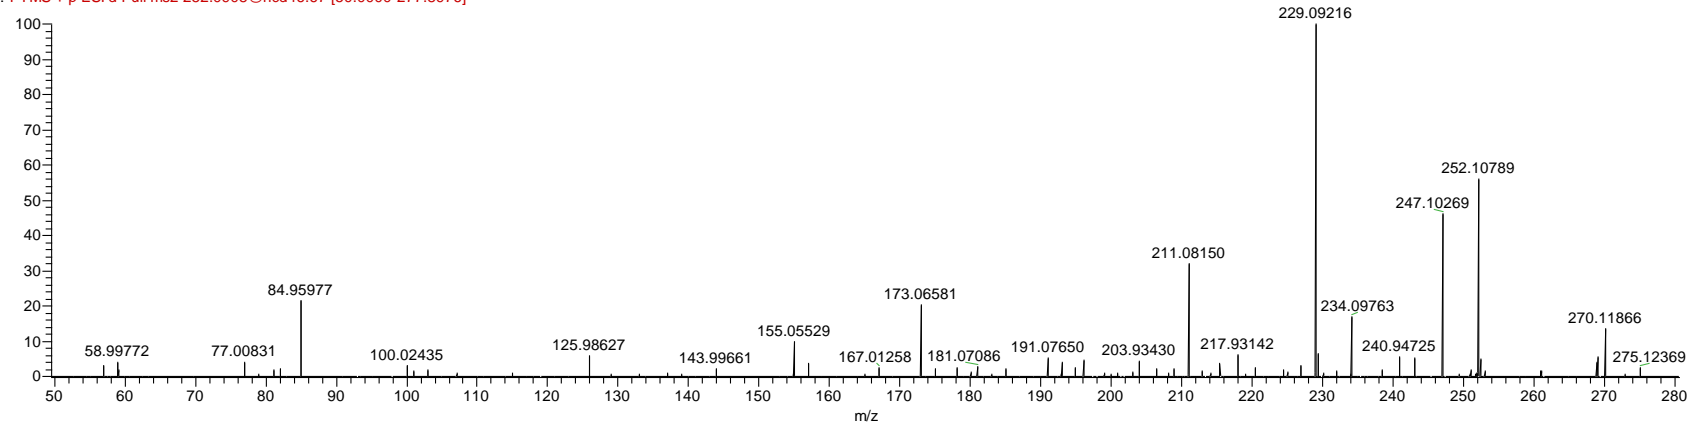

# Unknown II

vaso\_FSddMS2\_245\_455\_01  
30mg/1ml 70/30 met/acqua

03/14/22 17:06:52

RT: 0.00 - 23.00 SM: 15G

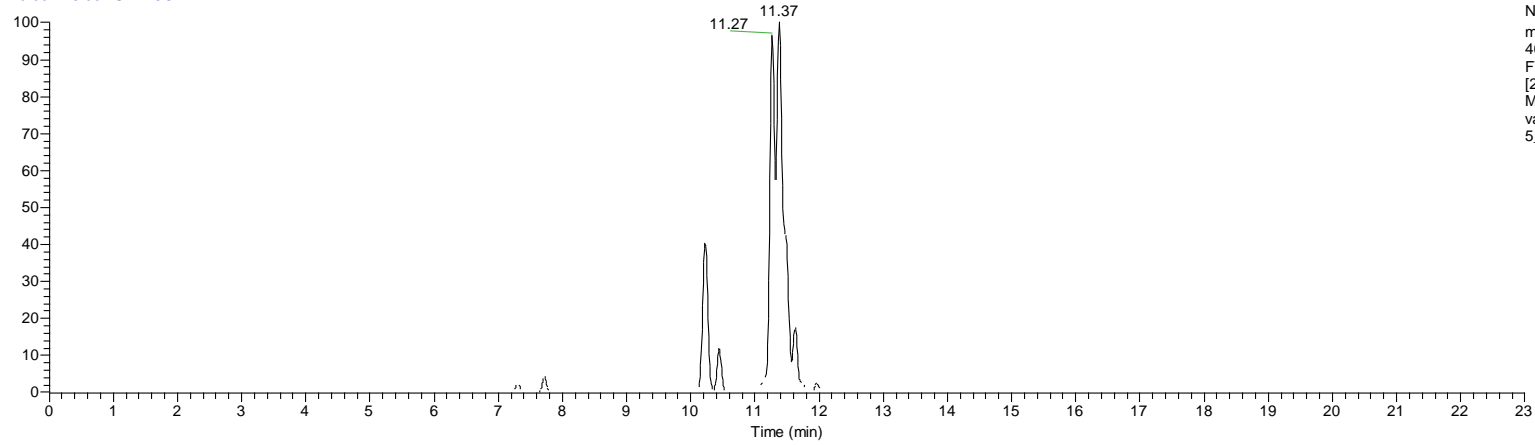

NL: 3.03E5  
m/z=  
403.17197-403.18003 F:  
FTMS + p ESI Full ms  
[245.0000-455.0000]  
MS  
vaso\_FSddMS2\_245\_45  
5\_01

vaso\_FSddMS2\_245\_455\_01 #4588-4841 RT: 11.29-11.73 AV: 5 SB: 2 5.55-8.24 , 1.27-3.73 NL: 4.62E4  
F: FTMS + p ESI d Full ms2 403.2326@hcd46.67 [50.0000-432.0623]

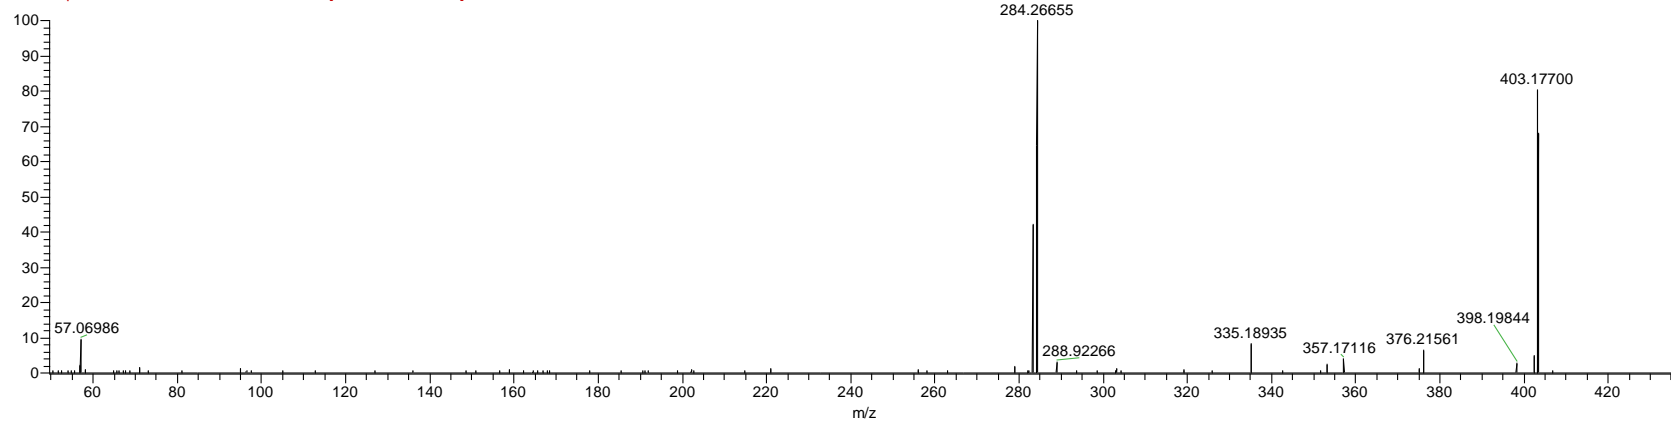

# Unknown III

vaso\_FSddMS2\_150\_255\_01  
30mg/1ml 70/30 met/acqua

03/14/22 16:42:48

RT: 0.00 - 23.01 SM: 15G

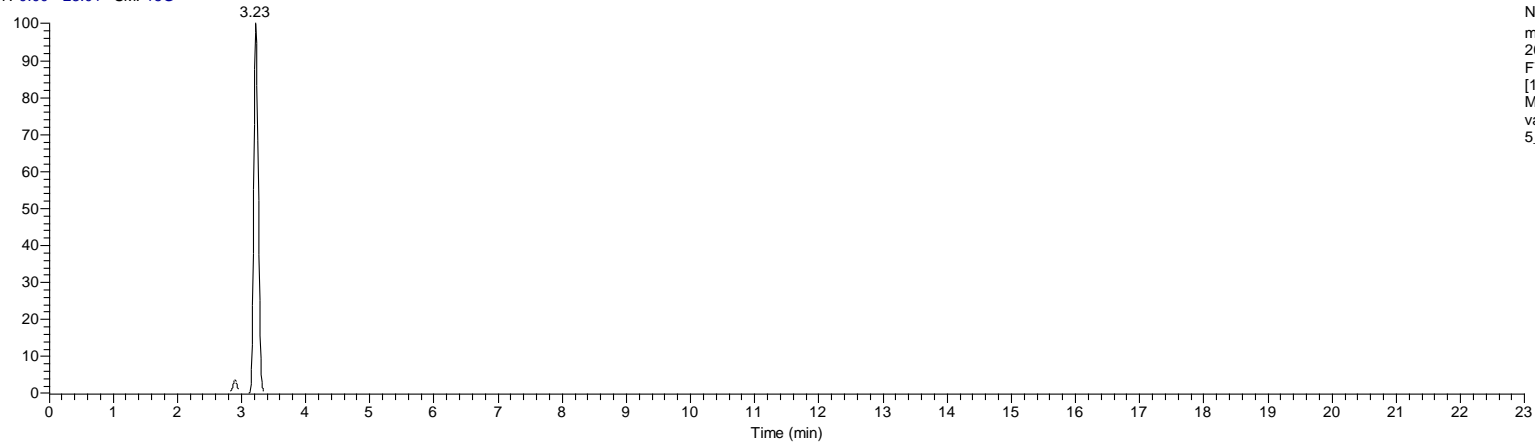

NL: 4.57E7  
m/z=  
201.10029-201.10431 F:  
FTMS + p ESI Full ms  
[150.0000-255.0000]  
MS  
vaso\_FSddMS2\_150\_25  
5\_01

vaso\_FSddMS2\_150\_255\_01 #1257-1389 RT: 2.94-3.20 AV: 2 SB: 17 1.25-15.92 , 0.00-0.42 NL: 3.61E6  
F: FTMS + p ESI d Full ms2 201.1361@hcd46.67 [45.1848-225.9238]

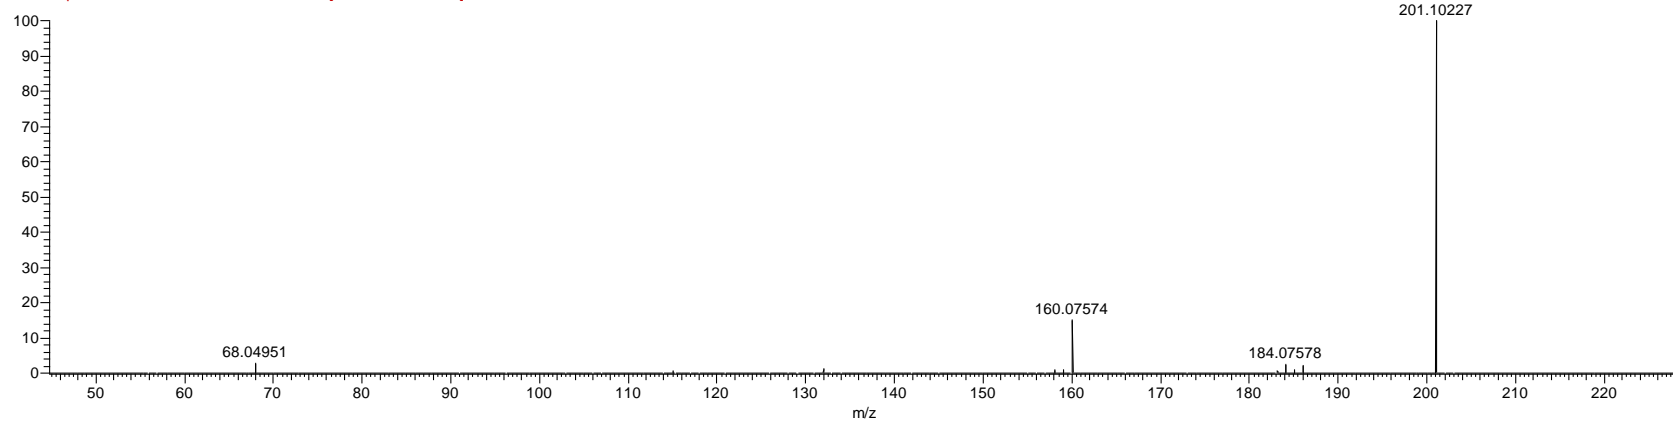

Supplement: 41598_2024_78721_MOESM1_ESM.pdf [file 41598_2024_78721_MOESM1_ESM.pdf]
